# Supplementary material for: Spectroscopic characterization of (diiodomethyl)zinc iodide: application to the stereoselective synthesis and functionalization of iodocyclopropanes
Source: Royal Society of Chemistry journal article supplement (doi:10.1039/c7cc04348a), 2017-01-01

## Supporting Information for:

# Spectroscopic Characterization of Diiodomethylzinc Iodide: Application to the Stereoselective Synthesis and Functionalization of Iodocyclopropanes.

Emmanuelle M. D. Allouche,<sup>‡</sup> Sylvain Taillemaud<sup>‡</sup> and André B. Charette\*

Centre in Green Chemistry and Catalysis, Department of Chemistry, Université de Montréal, P.O.  
Box 6128, Station Downtown, Montréal, Québec, Canada H3C 3J7.

### Table of contents

|                                              |            |
|----------------------------------------------|------------|
| <b>General Experimental Conditions .....</b> | <b>S2</b>  |
| <b>Carbenoid Experiments .....</b>           | <b>S3</b>  |
| <b>Optimizations .....</b>                   | <b>S6</b>  |
| Iodocyclopropanation .....                   | S6         |
| Suzuki-Miyaura Cross-Coupling.....           | S8         |
| <b>Synthetic Procedures.....</b>             | <b>S11</b> |
| <b>Compounds characterizations.....</b>      | <b>S13</b> |
| <b>X-Ray Data .....</b>                      | <b>S33</b> |
| <b>NMR Spectra.....</b>                      | <b>S35</b> |

## General Experimental Conditions

**General:** Unless stated otherwise, all reactions were run under an argon atmosphere with thoroughly flame-dried glassware using standard techniques for manipulating air-sensitive compounds.<sup>i</sup> CH<sub>2</sub>Cl<sub>2</sub> and Et<sub>2</sub>O were obtained by filtration through drying columns (packed with alumina), *tert*-amyl alcohol was distilled over calcium hydride under argon prior to use. Flash column chromatography was performed using an automatic purification system (Teledyne Isco Combiflash® Rf or Sq16x). Prepacked normal phase silica gel columns were used for separation of products using Teledyne Isco RediSep® Rf High Performance Gold or Silicycle SiliaSep™ High Performance columns (12 g, 24 g, 40 g, or 80 g). Analytical thin-layer chromatography (TLC) was performed on precoated, glass-backed silica gel plates. Visualization of the developed chromatogram was performed by UV absorbance (254 nm), or using potassium permanganate and/or cerium ammonium molybdate stains.

Melting points were obtained on a Buchi melting point apparatus and are uncorrected. Nuclear magnetic resonance spectra were recorded on either a 400 or 500 MHz spectrometers (Bruker Ultrashield 400 or Bruker Ultrashield 500 plus) at 293 K. The corresponding chemical shifts for <sup>1</sup>H NMR and <sup>13</sup>C NMR spectra are reported in parts per million relative to the chemical shift of tetramethylsilane and recorded in CDCl<sub>3</sub>, using the residual CHCl<sub>3</sub> as reference (<sup>1</sup>H: δ 7.26 ppm, <sup>13</sup>C: δ 77.16 ppm). The corresponding chemical shifts of <sup>19</sup>F NMR spectra are recorded in parts per million relative to the chemical shift of CFCl<sub>3</sub> and recorded in CDCl<sub>3</sub>, using α,α,α-trifluorotoluene (<sup>19</sup>F: -63.72 ppm) as reference. The data is reported as follows: chemical shift (ppm), multiplicity (s = singlet, br = broad singlet, d = doublet, dd = doublet of doublets, dt = doublet of triplets, td = triplet of doublets, ddd = doublet of doublet of doublets, dtd = doublet of triplet of doublets, t = triplet, app. t = apparent triplet, q = quadruplet, quin = quintet, sext = sextet and m = multiplet), coupling constant in Hz, integration. For new compounds, DEPT135 experiments were conducted to assign the substitution pattern for each carbon (Cq, CH, CH<sub>2</sub>, CH<sub>3</sub>). Infrared spectra were recorded on a Bruker Vertex Series FTIR and are reported in reciprocal centimeters (cm<sup>-1</sup>). High resolution mass spectra and SFC chromatography experiments were performed by the Centre regional de spectroscopie de masse de l'Université de Montréal. Optical rotation values were recorded on a Anton Parr MCP200 apparatus using a 0.5 dm quartz cell at a 589 nm wavelength and 20 °C.

**Reagents:** Commercially available reagents were used as supplied or purified by standard techniques where necessary. Non-commercial starting materials were synthesized according to literature procedures. The chiral (R,R)-dioxaborolane was synthesized as previously reported in the literature.<sup>ii</sup>

**Compound Handling/Storage:** During all handling, exposure of the iodocyclopropanes to light should be minimized. The iodocyclopropanes products may be stored for prolonged periods below 0 °C in the dark without noticeable decomposition.

<sup>i</sup> Shriver, D. F. & Drezzdon, M. A. *The Manipulation of Air-Sensitive Compounds*; 2nd Edition; Wiley: New York, 1986.

<sup>ii</sup> Charette, A.B.; Lebel, H. *Org. Synth.* **1999**, 76, 86.

### Carbenoid Experiments

In a round-bottomed flask, iodoform (307.5 mg, 0.78 mmol, 1.0 equiv) was suspended in  $\text{CD}_2\text{Cl}_2$  (0.7 mL) under strong stirring. In a glovebox, another round-bottomed flask was charged with zinc iodide (124.7 mg, 0.39 mmol, 0.5 equiv), equipped with a septum and removed. To this was then added triphenylmethane (44.3 mg, 0.18 mmol, 0.23 equiv),  $\text{Et}_2\text{O}$  (165  $\mu\text{L}$ , 1.59 mmol, 2.0 equiv) and  $\text{CD}_2\text{Cl}_2$  (0.7 mL). Diethylzinc (40  $\mu\text{L}$ , 0.39 mmol, 0.5 equiv) was added neat under strong stirring. Upon dissolution (partial, about 30 minutes), this mixture was cannulated over the vial containing the iodoform suspension at 0 °C. After 20 minutes, an aliquot was cannulated into a flame-dried NMR tube under argon, and the spectra were recorded immediately (given below). It is worthy to note that the solution is heterogeneous.

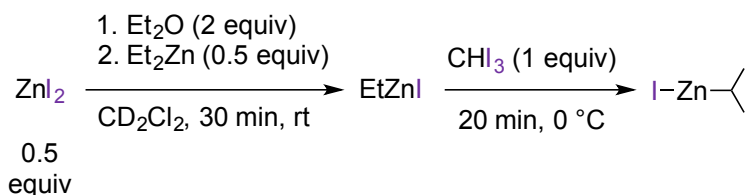

### $^1\text{H}$ NMR Spectra

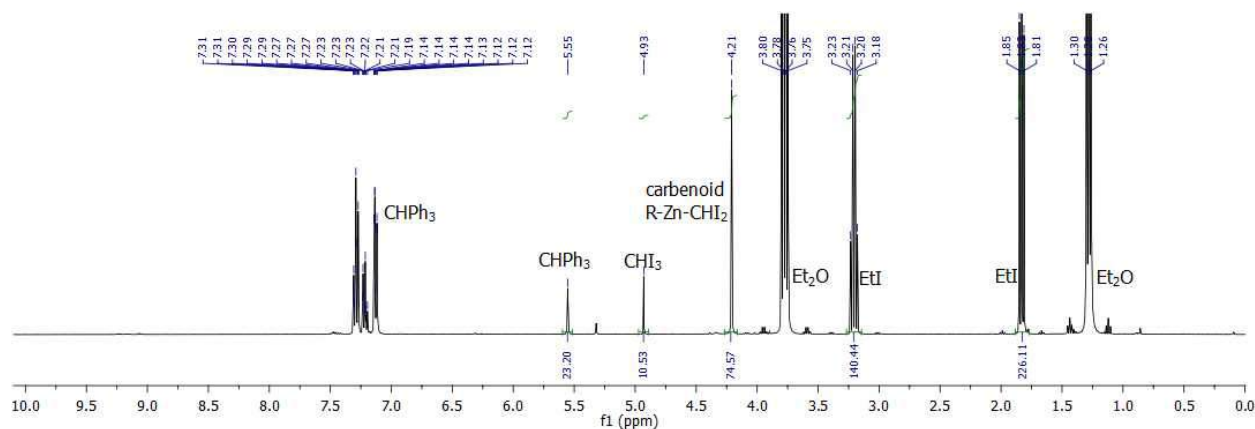

### $^{13}\text{C}$ NMR Spectra

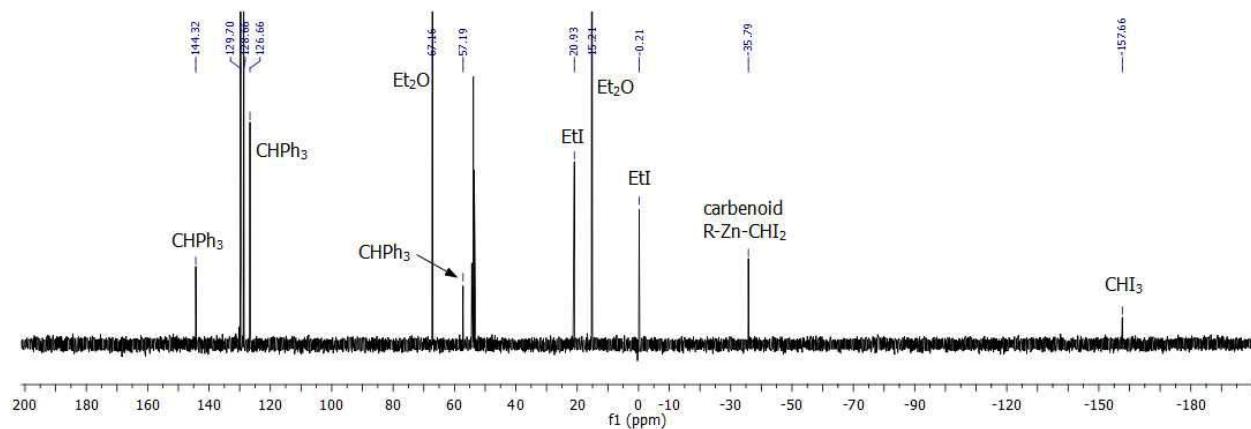

**$^1\text{H}$ - $^{13}\text{C}$  correlation HSQC Spectra**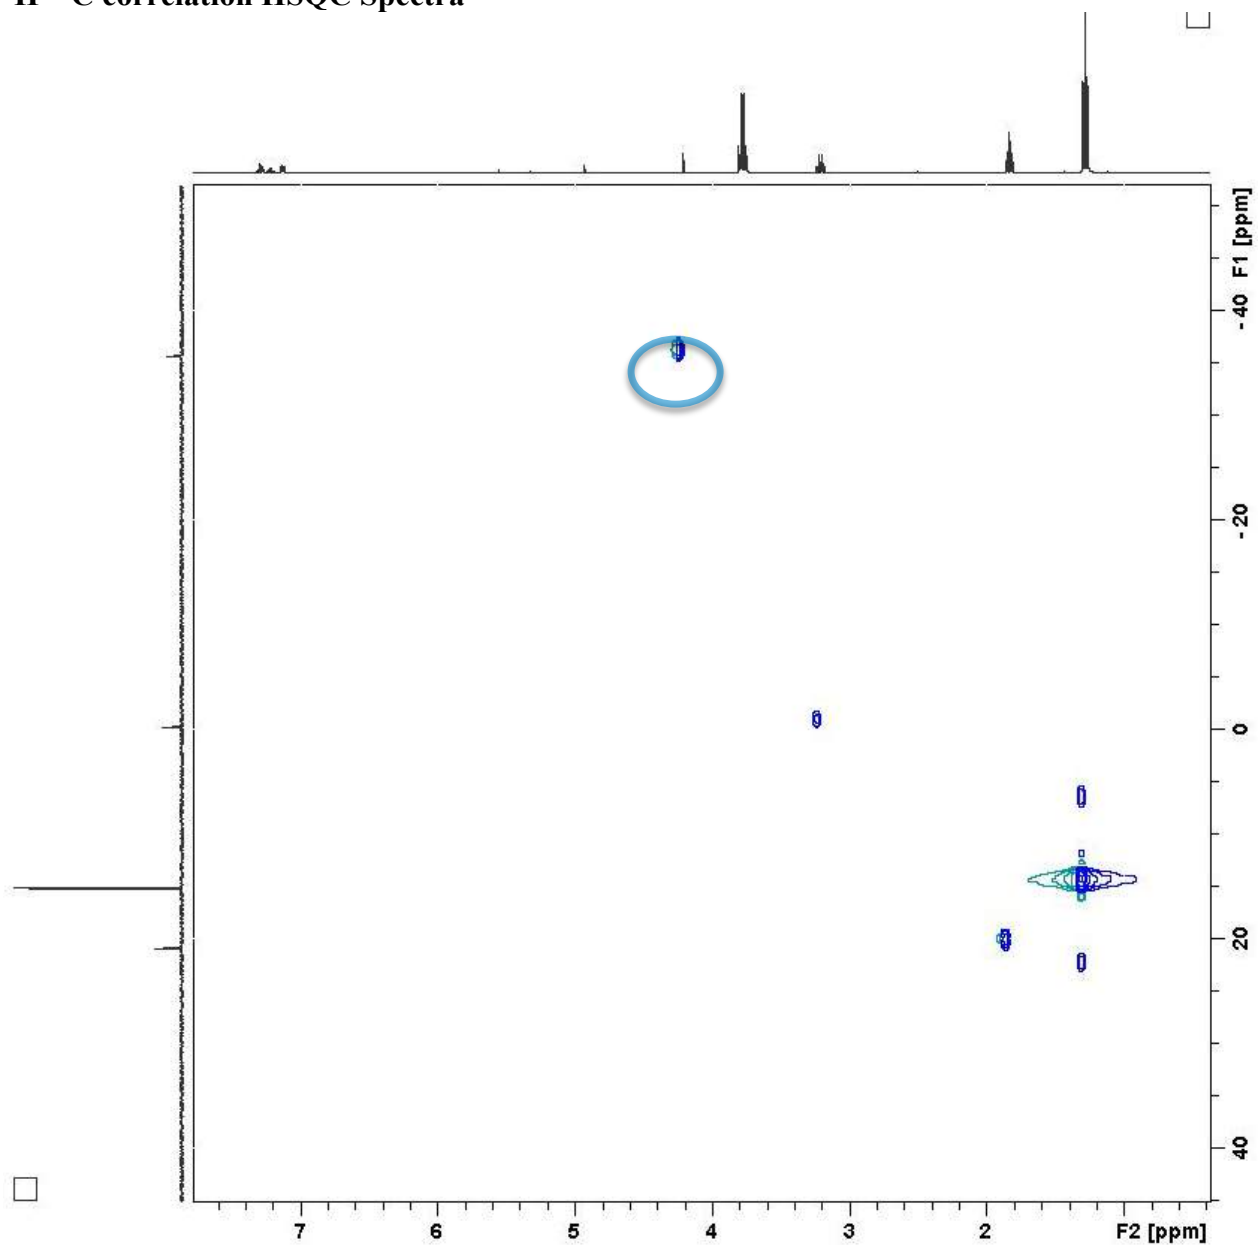

The remaining of the solution was then quenched with HCl 1M and the layers were allowed to separate. The organic one was passed through an anhydrous  $\text{MgSO}_4$  pad and directly introduced into a NMR tube. Spectra were recorded immediately, given below.

### $^1\text{H}$ NMR Spectra

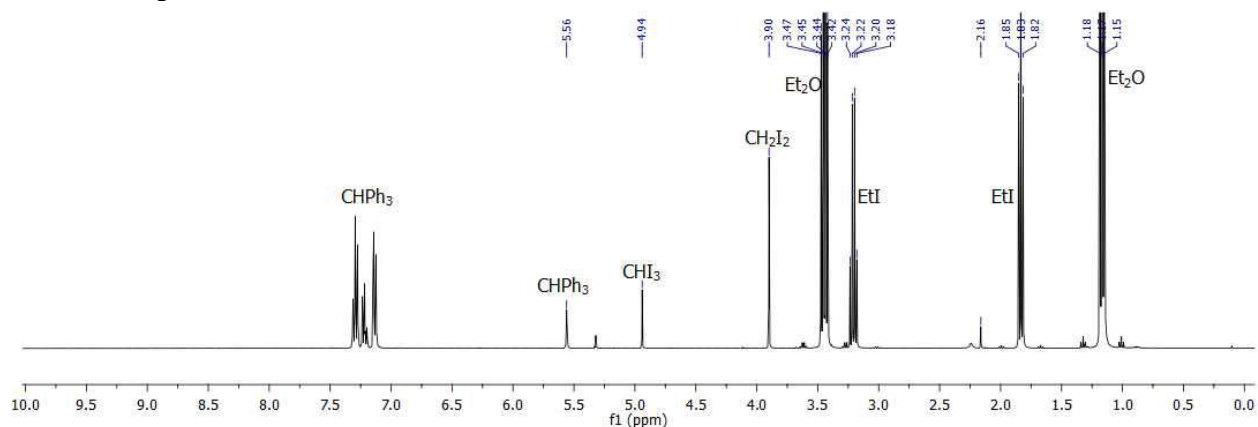

Signal at 2.16 corresponds to iodomethane, signaling the formation of traces of a gem-dizinc carbenoid.

### $^{13}\text{C}$ NMR Spectra

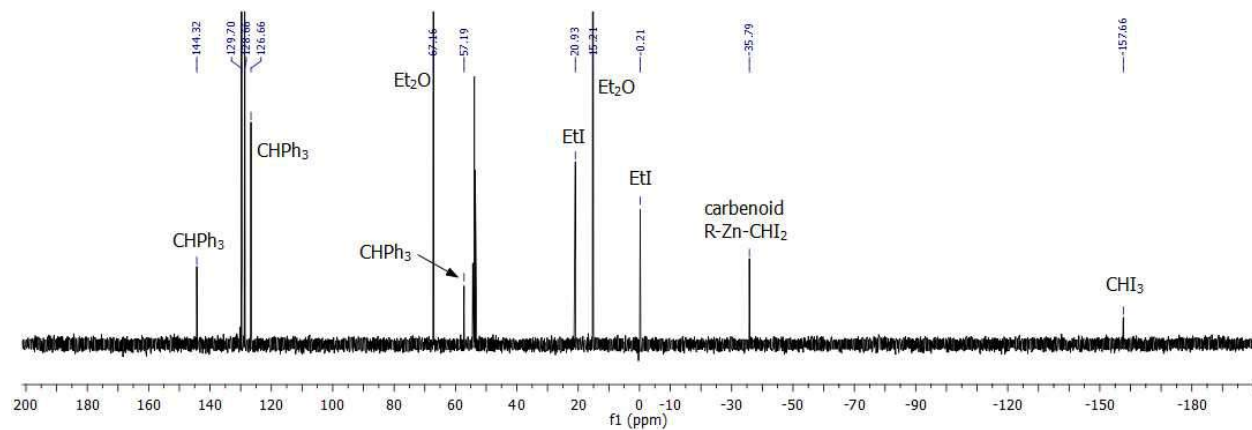

## Optimizations

### Iodocyclopropanation

Reaction Conditions: Addition of the EtZnI•2Et<sub>2</sub>O Solution Over the CHI<sub>3</sub> Suspension.

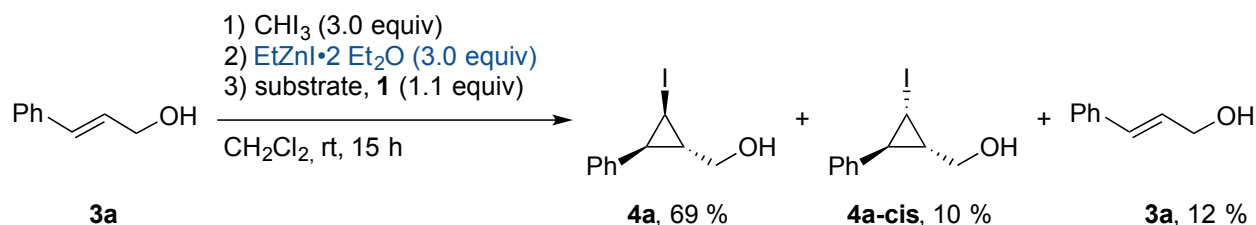

Remaining EtZnI•2 Et<sub>2</sub>O was observed on the vial after cannulation, meaning a loss of reagent. To overcome this, we decided to do a reverse addition procedure where the iodoform would be added as a solid to the EtZnI solution.

Reaction Conditions: Addition of the CHI<sub>3</sub> as a Solid Over the EtZnI•2Et<sub>2</sub>O Solution.

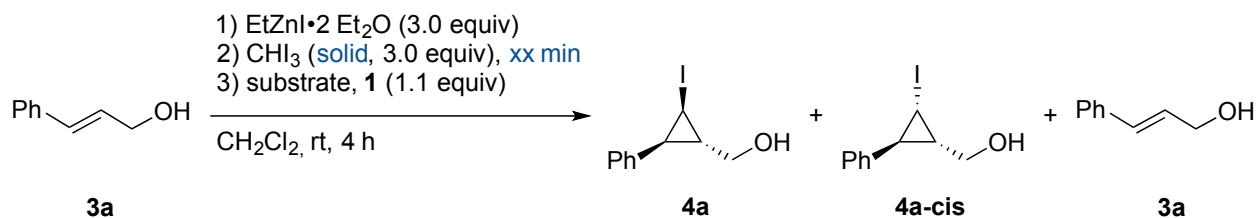

| Entry | xx (min) | Color of the carbenoid sln <sup>a</sup> | 3a (%) <sup>b</sup> | 4a + 4a-cis (%) <sup>b</sup> | d.r. <sup>b</sup> |
|-------|----------|-----------------------------------------|---------------------|------------------------------|-------------------|
| 1     | 10       | Cream Brown                             | 6                   | 82                           | 7 : 1             |
| 2     | 30       | Dark Green                              | 47                  | 44                           | 7 : 1             |

<sup>a</sup> Color observed just before the addition of the substrate and 1. <sup>b</sup> Determined by <sup>1</sup>H NMR using Ph<sub>3</sub>CH as internal standard.

Those results indicate that the carbenoid is not stable over time at room temperature. We decided to do this step at 0 °C instead in order to allow the formation of the carbenoid but prevent its degradation

## Timerange of the Reaction

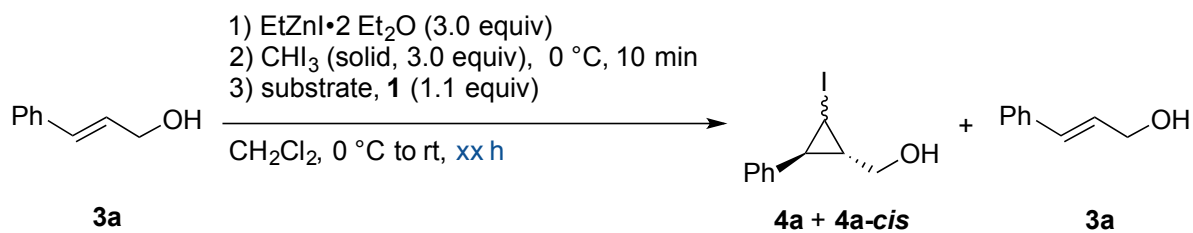

| Time (h)  | Remaining <b>3a</b> (%) <sup>a</sup> | <b>4a + 4a-cis</b> (%) <sup>b</sup> |
|-----------|--------------------------------------|-------------------------------------|
| <b>1</b>  | 19                                   | 67                                  |
| <b>4</b>  | 3                                    | 87                                  |
| <b>6</b>  | 0                                    | 88                                  |
| <b>14</b> | 0                                    | 87                                  |
| <b>21</b> | 0                                    | 85                                  |

<sup>a</sup> <sup>1</sup>H NMR yields using Ph<sub>3</sub>CH as internal standard.<sup>b</sup> Combined <sup>1</sup>H NMR yields of both diastereoisomers

## Composition of the Reaction Mixture over Time

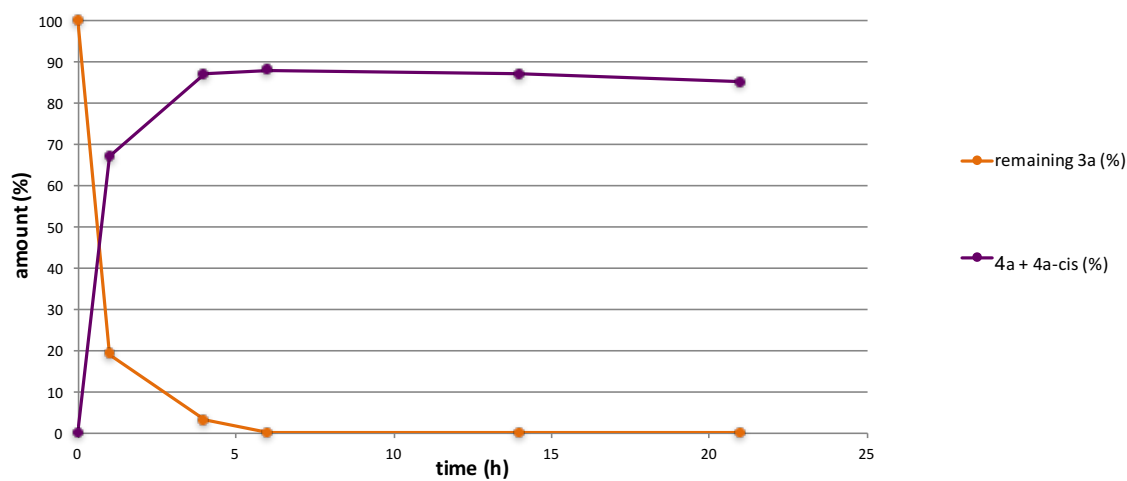

## Suzuki-Miyaura Cross-Coupling

## Temperature Screening

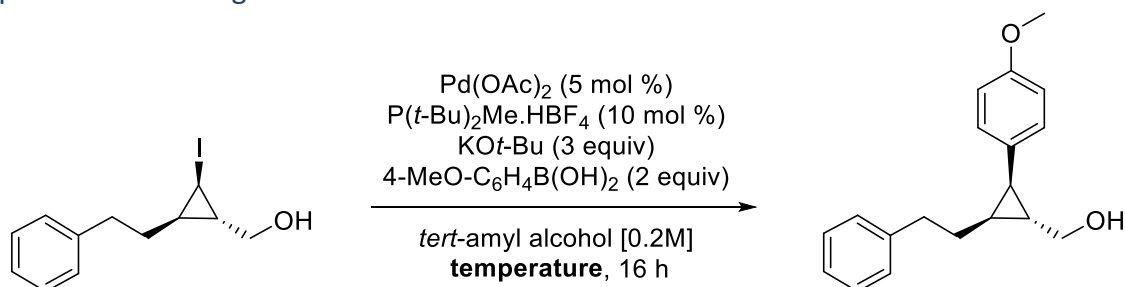

| Entry | Temperature (°C) | Yield (%) <sup>a</sup> | SM (%) <sup>a</sup> |
|-------|------------------|------------------------|---------------------|
| 1     | rt               | 0                      | 100                 |
| 2     | 45 °C            | 0                      | 100                 |
| 3     | 60 °C            | 85                     | 0                   |

<sup>a</sup>Average of two runs. Determined by <sup>1</sup>H NMR ( $\text{Ph}_3\text{CH}$  used as internal standard).

## Base Screening

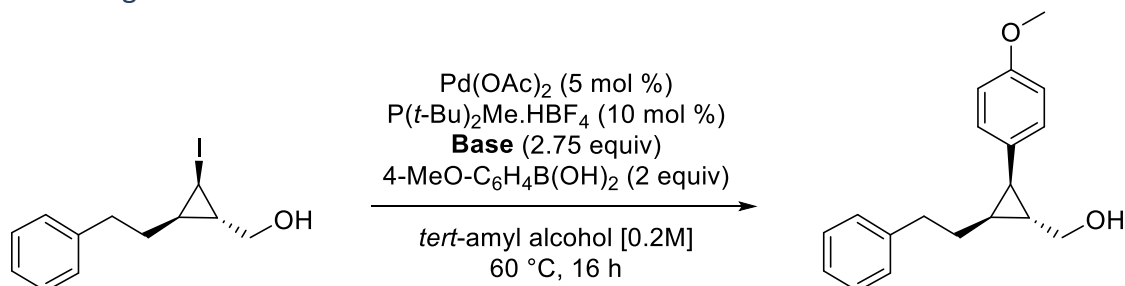

| Entry | Base                     | Yield (%) <sup>a</sup> | SM (%) <sup>a</sup> |
|-------|--------------------------|------------------------|---------------------|
| 1     | <b>KOt-Bu</b>            | 90                     | 0                   |
| 2     | KOH                      | 52                     | 30                  |
| 3     | $\text{Cs}_2\text{CO}_3$ | 0                      | 100                 |
| 4     | $\text{K}_3\text{PO}_4$  | 0                      | 100                 |

<sup>a</sup>Average of two runs. Determined by <sup>1</sup>H NMR ( $\text{Ph}_3\text{CH}$  used as internal standard).

## Ligand Screening

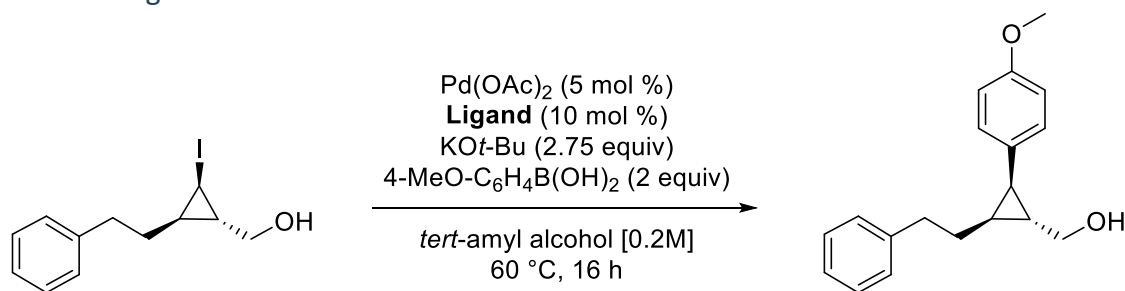



| Entry | Ligand                                              | Yield (%) <sup>a</sup> | SM (%) <sup>a</sup> |
|-------|-----------------------------------------------------|------------------------|---------------------|
| 1     | <b>P(<i>t</i>-Bu)<sub>2</sub>Me.HBF<sub>4</sub></b> | <b>90</b>              | <b>0</b>            |
| 2     | P( <i>t</i> -Bu) <sub>3</sub> .HBF <sub>4</sub>     | 0                      | 54                  |
| 3     | PCy <sub>3</sub>                                    | 66                     | 0                   |
| 4     | PPh <sub>3</sub>                                    | 20                     | 10                  |
| 5     | XPhos                                               | 80                     | 0                   |
| 6     | SPhos                                               | 76                     | 0                   |
| 7     | PhDavePhos                                          | 62                     | 0                   |

<sup>a</sup> Average of two runs. Determined by <sup>1</sup>H NMR (Ph<sub>3</sub>CH used as internal standard).

| Entry | Pd/L ratio | Yield (%) <sup>a</sup> | SM (%) <sup>a</sup> |
|-------|------------|------------------------|---------------------|
| 1     | <b>1:2</b> | <b>90</b>              | <b>0</b>            |
| 2     | 1:1        | 78                     | 0                   |
| 3     | 1:3        | 67                     | 14                  |

<sup>a</sup> Average of two runs. Determined by <sup>1</sup>H NMR (Ph<sub>3</sub>CH used as internal standard).

### Solvent Screening

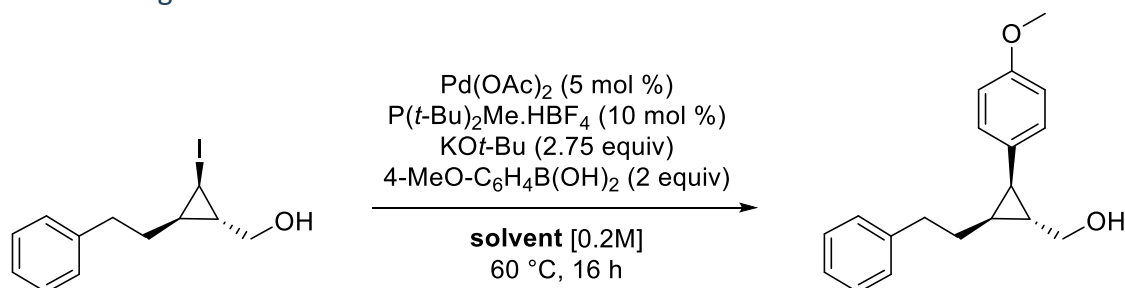

| Entry | Solvent                         | Yield (%) <sup>a</sup> | SM (%) <sup>a</sup> |
|-------|---------------------------------|------------------------|---------------------|
| 1     | <b><i>tert</i>-amyl-alcohol</b> | <b>90</b>              | <b>0</b>            |
| 2     | <i>tert</i> -butanol            | 88                     | 0                   |
| 3     | <i>n</i> -butanol               | 44                     | 44                  |
| 4     | methanol                        | 0                      | 90                  |

<sup>a</sup> Average of two runs. Determined by <sup>1</sup>H NMR (Ph<sub>3</sub>CH used as internal standard).

### Use of the 3<sup>rd</sup> Generation of Buchwald Precatalyst as the Palladium Source

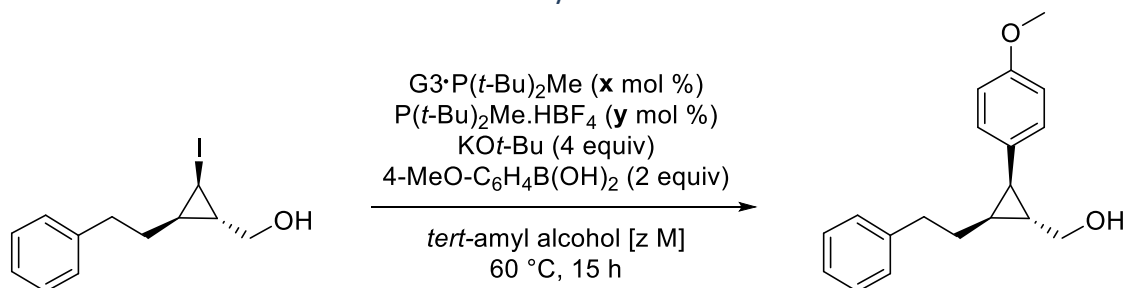

| Entry | x (mol %)      | y (mol %) | Pd/L ratio | z [M]       | Yield (%) <sup>a</sup> | SM (%) <sup>a</sup> |
|-------|----------------|-----------|------------|-------------|------------------------|---------------------|
| 1     | 5 mol %        | -         | 1:1        | 0.2M        | 72                     | 0                   |
| 2     | 5 mol %        | 5 mol %   | 1:2        | 0.2M        | 78                     | 0                   |
| 3     | 5 mol %        | 10 mol %  | 1:3        | 0.2M        | 67                     | 0                   |
| 4     | 10 mol %       | 10 mol %  | 1:2        | 0.2M        | 74                     | 0                   |
| 5     | 5 mol %        | 5 mol %   | 1:2        | 0.1M        | 84                     | 0                   |
| 6     | 5 mol %        | 5 mol %   | 1:2        | 0.05M       | 83                     | 0                   |
| 7     | <b>5 mol %</b> | -         | <b>1:1</b> | <b>0.1M</b> | <b>82</b>              | <b>0</b>            |

<sup>a</sup>Average of two runs. Determined by <sup>1</sup>H NMR (Ph<sub>3</sub>CH used as internal standard).

### Final optimization

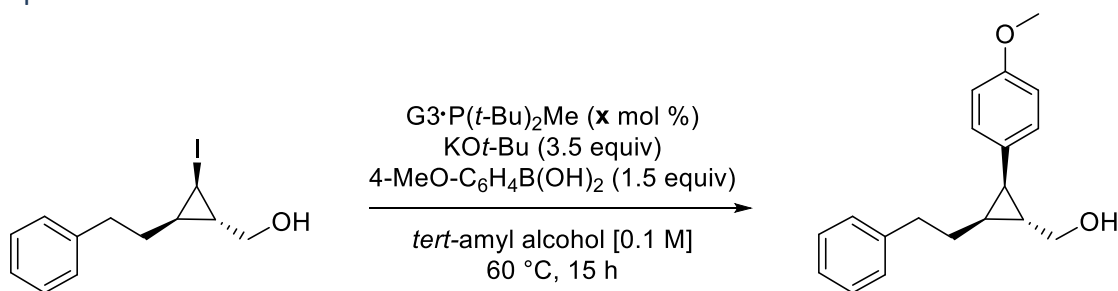

| Entry | x (mol %) | Yield (%) <sup>a</sup> | SM (%) <sup>a</sup> |
|-------|-----------|------------------------|---------------------|
| 1     | 5 mol %   | 80                     | 0                   |
| 2     | 2.5 mol % | 80                     | 0                   |

<sup>a</sup>Average of two runs. Determined by <sup>1</sup>H NMR (Ph<sub>3</sub>CH used as internal standard).

## Synthetic Procedures

### Procedure A: Enantioselective Iodocyclopropanation

In a round-bottomed flask was added the chosen substrate (1.0 mmol, 1.0 equiv), dioxaborolane (298 mg, 1.1 mmol, 1.1 equiv), and anhydrous  $\text{CH}_2\text{Cl}_2$  (2 mL). In a glovebox, a round-bottomed flask was charged with zinc iodide (479 mg, 1.5 mmol, 1.5 equiv), sealed and removed, and to this was added  $\text{Et}_2\text{O}$  (0.63 mL, 6.1 mmol, 6.1 equiv) and  $\text{CH}_2\text{Cl}_2$  (6 mL). Diethylzinc (154  $\mu\text{L}$ , 1.5 mmol, 1.5 equiv) was then added neat. Upon observation of full dissolution of the reaction mixture (about 1 hour), the flask was cooled down to 0 °C with a water/ice bath, briefly opened and iodoform (1.18 g, 3.0 mmol, 3.0 equiv) was added in one portion. The mixture was stirred at this temperature for 10 minutes and the content of the first flask (mixture of the substrate and dioxaborolane in  $\text{CH}_2\text{Cl}_2$ ) was then added via cannula. After 5 minutes, the bath was removed and the reaction mixture was allowed to warm up to room temperature and stirred for 14 hours. Upon reaction completion, it was quenched with 10% aqueous HCl, and diluted with  $\text{Et}_2\text{O}$ . The layers were separated, and the aqueous one was extracted with  $\text{Et}_2\text{O}$  (2 x 20 mL). The organic layers were combined and a solution of 6 mL of hydrogen peroxide (30% in water) and 18 mL of NaOH 2M was added. The mixture was stirred for 5 minutes and the organic layer was separated and washed successively with 10% aqueous HCl, saturated  $\text{NaHCO}_3$  and brine, dried over anhydrous  $\text{MgSO}_4$ , filtered and concentrated under vacuum. The crude product was then purified by dihydroxylation (to destroy the starting alkene, if needed) and silica-gel chromatography.

### Procedure B: Racemic Iodocyclopropanation

Racemic compounds for all products except product **4h** were synthesized following procedure **A**, omitting the dioxaborolane auxiliary. Racemic compound for product **4h** was synthesized following procedure **A** using racemic dioxaborolane.

### Procedure C: Dihydroxylation

The crude reaction mixture was dissolved in acetone (2 mL) and water (2 mL). To this stirred solution was added potassium osmate dihydrate (0.005 mmol), followed by a solution of NMO (N-methyl morpholine oxide) in water (0.1 mL, 0.4 mmol, 50 wt%). The reaction mixture was stirred overnight, and upon completion was quenched with saturated  $\text{Na}_2\text{SO}_3$  (aq., 5 mL) and extracted with  $\text{Et}_2\text{O}$  (2 x 30 mL). The organic layers were combined and washed with 10% aqueous HCl and brine, dried over anhydrous  $\text{MgSO}_4$ , and the solvent removed under vacuum. The product was purified by silica-gel chromatography.

### General procedure D: Suzuki-Miyaura Cross-Coupling

In a 10 mL round-bottomed flask was weighted the chosen substrate (0.4 mmol, 1.0 equiv), the chosen boronic acid (0.6 mmol, 1.5 equiv), the pre-catalyst (0.01 mmol, 0.025 equiv) and the KOt-Bu (1.4 mmol, 3.5 equiv). The flask was then flushed with argon during 20 minutes and then freshly distilled and degassed *tert*-amyl alcohol (4 mL) was added. The resulting heterogeneous

mixture was stirred under an argon atmosphere at 60 °C for 15 hours. Upon completion, the reaction mixture was quenched with a saturated aqueous solution of NH<sub>4</sub>Cl and diluted with Et<sub>2</sub>O. The layers were separated, and the aqueous one extracted twice with Et<sub>2</sub>O. The organic layers were combined and a solution of 5 mL of hydrogen peroxide (30% in water) and 15 mL of NaOH 2M was added in one portion. The bi-phasic mixture was vigorously stirred for 5 minutes and the organic layer was separated and washed successively with HCl 2M, saturated NaHCO<sub>3</sub> and brine. The organic layer was dried over anhydrous MgSO<sub>4</sub>, filtered over a short pad of a mixture celite/silica with copious washing (Et<sub>2</sub>O or EtOAc) and concentrated under vacuum. The crude product was then purified by silica-gel chromatography.

#### Procedure E: Synthesis of Pre-catalyst **2**

The compound **2** was synthesized according to a modified procedure described by Buchwald *et al.*<sup>1</sup> In a glove-box, a 10 mL round-bottomed flask equipped with a magnetic stir bar was charged with the  $\mu$ -OMs dimer – 2-ammoniumbiphenyl mesylate (1.0 equiv) and P(*t*-Bu)<sub>2</sub>Me (1.0 equiv). The flask was removed from the glovebox, freshly distilled THF was added and the reaction mixture was stirred overnight at room temperature. The solvent was then removed under vacuum until ~10% remained. The residue was then triturated with pentane and the resulting solid was isolated *via* filtration and dried under vacuum overnight.

## Compounds characterizations

## Iodocyclopropanes

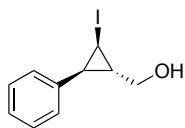

**((1S,2R,3S)-2-iodo-3-phenylcyclopropyl)methanol (4a):** Synthesized according to general procedure A using (*E*)-cinnamyl alcohol (134.7 mg, 1.0 mmol) as starting material. Purified by flash column chromatography using a gradient from 15:5 CH<sub>2</sub>Cl<sub>2</sub>/Hexanes to 15:4:1 CH<sub>2</sub>Cl<sub>2</sub>/Hexanes/Et<sub>2</sub>O as eluent. The product was isolated as an orange oil in 75% yield (206.0 mg, 0.75 mmol). The diastereomeric ratio (8:1) was determined by <sup>1</sup>H NMR on the crude mixture. The enantiomeric excess (98% *ee*) was determined by chiral SFC (Chiralpak AD-H 25 cm, 10% MeOH, 30 °C, 150 bar): t.r.<sub>min</sub> 5.0 min; t.r.<sub>maj</sub> 5.7 min. The characterization data match the literature.<sup>2</sup>

<sup>1</sup>H NMR (500 MHz, CDCl<sub>3</sub>) δ 7.38 – 7.27 (m, 3H), 7.22 – 7.14 (m, 2H), 3.82 (dd, *J* = 11.4, 6.0 Hz, 1H), 3.77 (dd, *J* = 11.4, 6.1 Hz, 1H), 2.92 (dd, *J* = 8.3, 4.7 Hz, 1H), 2.08 – 1.99 (m, 1H), 1.92 (qd, *J* = 6.1, 4.8 Hz, 1H), 1.55 (s, 1H). <sup>13</sup>C NMR (126 MHz, CDCl<sub>3</sub>) δ 138.5, 129.0, 128.2, 127.2, 64.7, 30.5, 26.1, -2.6.

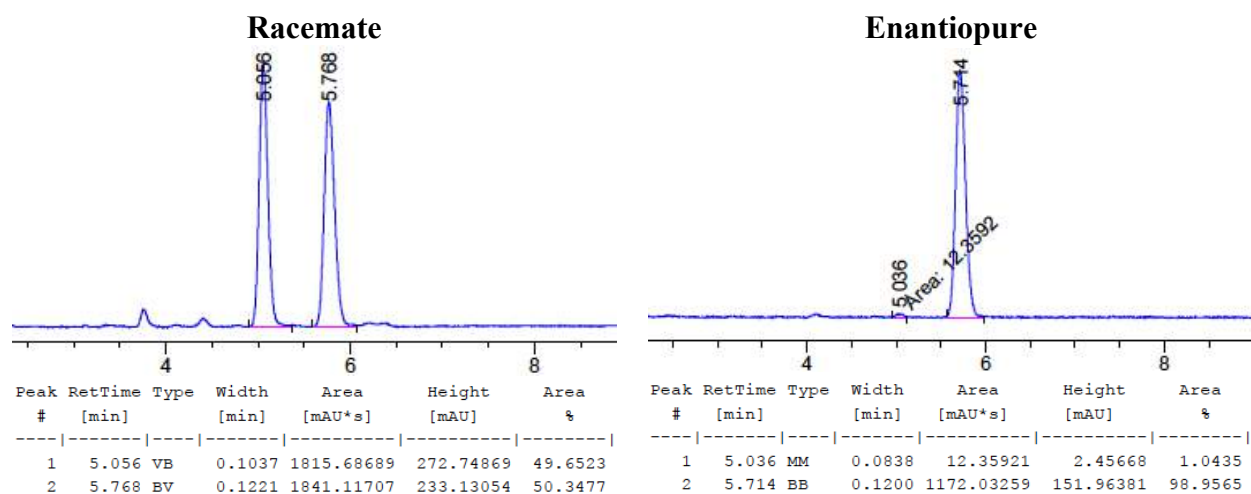

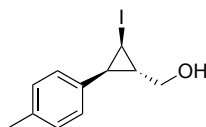

**((1S,2R,3S)-2-iodo-3-(*p*-tolyl)cyclopropyl)methanol (4b):** Synthesized according to general procedure **A** using (*E*)-3-(*p*-tolyl)prop-2-en-1-ol<sup>3</sup> (147.9 mg, 1.0 mmol) as starting material. Purified by flash column chromatography using a gradient from 15:5 CH<sub>2</sub>Cl<sub>2</sub>/Hexanes to 15:4:1 CH<sub>2</sub>Cl<sub>2</sub>/Hexanes/ Et<sub>2</sub>O as eluent. The product was isolated in 73% (210.4 mg, 0.73 mmol) yield as an off-white solid. The diastereomeric ratio (9:1) was determined by <sup>1</sup>H NMR on the crude mixture. The enantiomeric excess (96% *ee*) was determined by chiral SFC (Chiralpak AD-H 25 cm, 10% MeOH, 30 °C, 150 bar): t.r.<sub>min</sub> 6.0 min; t.r.<sub>maj</sub> 7.7 min. The characterization data match the literature.<sup>2</sup>

<sup>1</sup>H NMR (400 MHz, CDCl<sub>3</sub>) δ 7.15 (d, *J* = 7.9 Hz, 2H), 7.08 (d, *J* = 8.1 Hz, 2H), 3.80 (dd, *J* = 11.4, 6.0 Hz, 1H), 3.74 (dd, *J* = 11.4, 6.2 Hz, 1H), 2.89 (dd, *J* = 8.2, 4.7 Hz, 1H), 2.35 (s, 3H), 2.04 – 1.94 (m, 1H), 1.92 – 1.82 (m, 1H), 1.65 (s, 1H). <sup>13</sup>C NMR (101 MHz, CDCl<sub>3</sub>) δ 136.7, 135.4, 128.9, 128.8, 64.7, 30.4, 25.8, 21.3, -2.2.

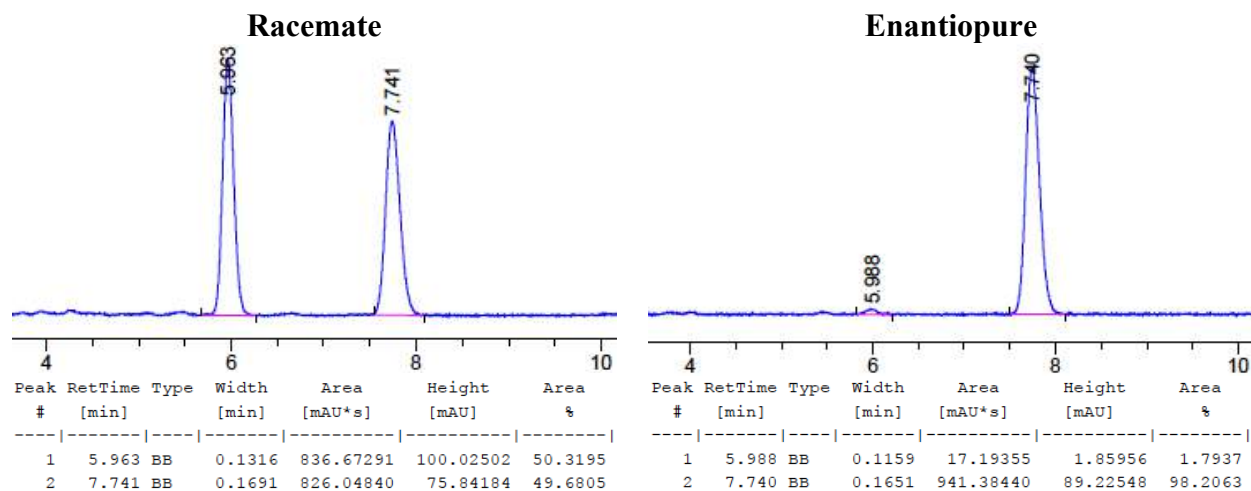

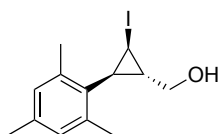

**((1S,2R,3S)-2-iodo-3-mesitylcyclopropyl)methanol (4c)** : Synthesized according to general procedure A using (*E*)-3-mesitylprop-2-en-1-ol<sup>4</sup> (177.4 mg, 1.0 mmol) as starting material. Purified by flash column chromatography using a gradient from 15:5 CH<sub>2</sub>Cl<sub>2</sub>/Hexanes to 15:4:1 CH<sub>2</sub>Cl<sub>2</sub>/Hexanes/Et<sub>2</sub>O as eluent. The product was isolated in 82% yield (262 mg, 0.83 mmol) as an off-white solid. The diastereomeric ratio (>20:1) was determined by <sup>1</sup>H NMR on the crude mixture. The enantiomeric excess (99% *ee*) was determined by chiral SFC (Chiralpak OJ-H 25 cm, 4% MeOH, 35 °C, 150 bar): t.r.<sub>min</sub> 6.5 min; t.r.<sub>maj</sub> 7.1 min. The characterization data match the literature.<sup>2</sup>

<sup>1</sup>H NMR (500 MHz, CDCl<sub>3</sub>) δ 6.87 (s, 2H), 3.99 (dd, *J* = 11.5, 5.4 Hz, 1H), 3.74 (dd, *J* = 11.5, 6.5 Hz, 1H), 2.92 (dd, *J* = 7.7, 4.3 Hz, 1H), 2.33 (s, 6H), 2.27 (s, 3H), 1.99 – 1.89 (m, 1H), 1.73 (app. t, *J* = 7.5 Hz, 1H), 1.54 (br s, 1H). <sup>13</sup>C NMR (126 MHz, CDCl<sub>3</sub>) δ 136.5, 132.8, 129.5, 65.0, 34.6, 23.3, 21.2, 21.1, -3.0.

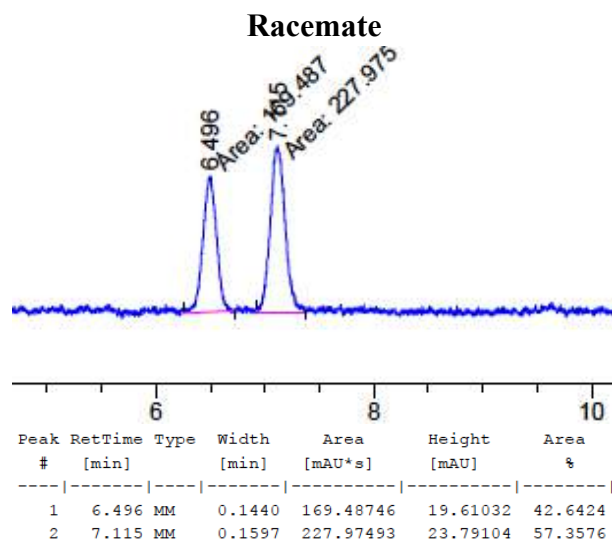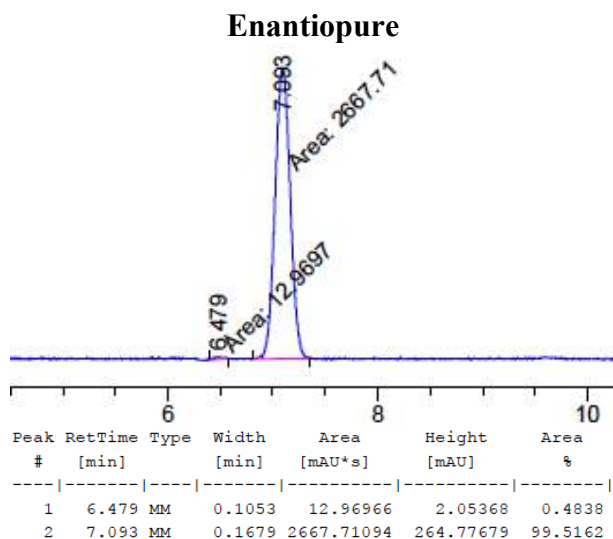

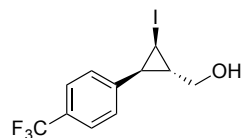

**((1*S*,2*R*,3*S*)-2-iodo-3-(4-(trifluoromethyl)phenyl)cyclopropyl)methanol (4d)**: Synthesized according to general procedure A using (*E*)-3-(4-(trifluoromethyl)phenyl)prop-2-en-1-ol<sup>5</sup> (200.9 mg, 1.0 mmol) as starting material. Purified by dihydroxylation (general procedure C) and flash column chromatography using a gradient from 15:5 CH<sub>2</sub>Cl<sub>2</sub>/Hexanes to 15:4:1 CH<sub>2</sub>Cl<sub>2</sub>/Hexanes/Et<sub>2</sub>O as eluent. The product was isolated in 64% yield (217.5 mg, 0.64 mmol) as a clear yellow oil. The diastereomeric ratio (11:1) was determined by <sup>1</sup>H NMR on the crude mixture. The enantiomeric excess (98% *ee*) was determined by chiral SFC (Chiralpak AD-H 25cm, 5% MeOH, 30 °C, 150 bar): *tr*<sub>min</sub>: 5.4 min; *tr*<sub>maj</sub>: 5.8 min.

<sup>1</sup>H NMR (500 MHz, CDCl<sub>3</sub>) δ 7.58 (d, *J* = 8.1 Hz, 2H), 7.29 (d, *J* = 8.5 Hz, 2H), 3.84 (dd, *J* = 9.9, 4.3 Hz, 1H), 3.81 (dd, *J* = 9.9, 4.3 Hz, 1H), 2.96 (dd, *J* = 8.3, 4.8 Hz, 1H), 2.14 – 2.06 (m, 1H), 1.98 – 1.86 (m, 1H), 1.82 (s, 1H). <sup>13</sup>C NMR (101 MHz, CDCl<sub>3</sub>) δ 142.7 (Cq), 129.3 (CH), 126.2 (Cq), 125.1 (q, CH, *J* = 3.7 Hz), 122.6 (Cq), 64.1 (CH<sub>2</sub>), 30.9 (CH), 25.7 (CH), -3.6 (CH). <sup>19</sup>F NMR (376 MHz, CDCl<sub>3</sub>) δ -62.48. FTIR (cm<sup>-1</sup>) (neat): 3311, 2928, 2874, 1617, 1322, 1111, 844, 596. HRMS (ESI, Pos) calculated for C<sub>11</sub>H<sub>10</sub>F<sub>3</sub>IONa [M+Na]<sup>+</sup>: 364.96206 *m/z*, found 364.96111 *m/z*. [α]<sub>D</sub><sup>20</sup> = +42.8 (c 0.73, CHCl<sub>3</sub>). *R*<sub>f</sub> = 0.24 (30% AcOEt in Hexanes).

Racemate

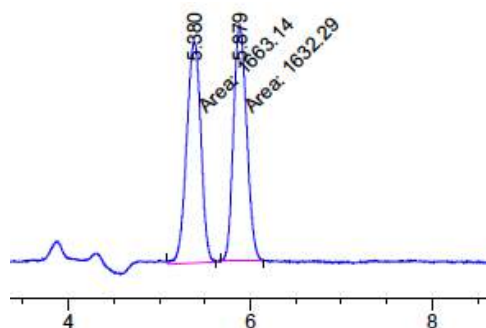

| Peak # | RetTime [min] | Type | Width [min] | Area [mAU*s] | Height [mAU] | Area %  |
|--------|---------------|------|-------------|--------------|--------------|---------|
| 1      | 5.380         | MM   | 0.1816      | 1663.14441   | 152.63048    | 50.4681 |
| 2      | 5.879         | MM   | 0.1672      | 1632.28931   | 162.67099    | 49.5319 |

Enantiopure

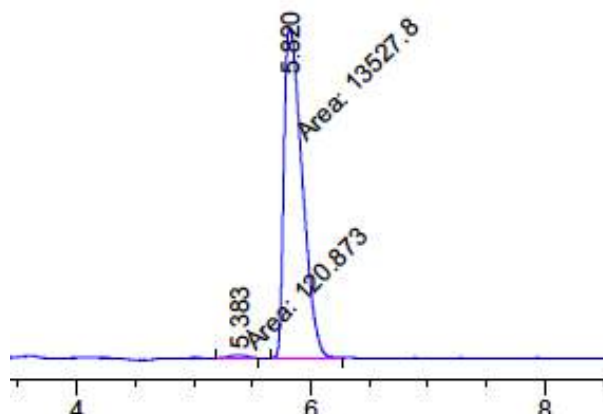

| Peak # | RetTime [min] | Type | Width [min] | Area [mAU*s] | Height [mAU] | Area %  |
|--------|---------------|------|-------------|--------------|--------------|---------|
| 1      | 5.383         | MM   | 0.1624      | 120.87253    | 12.40739     | 0.8856  |
| 2      | 5.820         | MM   | 0.1807      | 1.35278e4    | 1247.82654   | 99.1144 |



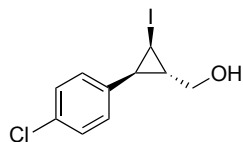

**((1S,2R,3S)-2-iodo-3-(4-chlorophenyl)cyclopropyl)methanol (4e):** Synthesized according to general procedure A using (*E*)-3-(4-chlorophenyl)prop-2-en-1-ol<sup>6</sup> (167.2 mg, 1.0 mmol) as starting material. Purified by flash column chromatography using a gradient from 15:5 CH<sub>2</sub>Cl<sub>2</sub>/Hexanes to 15:4:1 CH<sub>2</sub>Cl<sub>2</sub>/Hexanes/Et<sub>2</sub>O as eluent. The product was isolated as a clear oil in 78% yield (239.3 mg, 0.78 mmol). The diastereomeric ratio (11:1) was determined by <sup>1</sup>H NMR on the crude mixture. The enantiomeric excess (98% *ee*) was determined by chiral SFC (Chiralpak AD-H 25 cm, 15% MeOH, 30 °C, 150 bar): t.r.<sub>min</sub> 4.8 min; t.r.<sub>maj</sub> 4.2 min. The characterization data match the literature.<sup>2</sup>

<sup>1</sup>H NMR (400 MHz, CDCl<sub>3</sub>) δ 7.32 – 7.29 (m, 2H), 7.11 (d, *J* = 8.4 Hz, 2H), 3.82 – 3.72 (m, 2H), 2.90 (dd, *J* = 8.2, 4.8 Hz, 1H), 2.07 – 1.93 (m, 1H), 1.84 (dt, *J* = 12.1, 6.0 Hz, 1H), 1.77 (s, 1H). <sup>13</sup>C NMR (101 MHz, CDCl<sub>3</sub>) δ 137.1, 132.9, 130.33, 128.35, 64.3, 30.7, 25.4, -3.0.

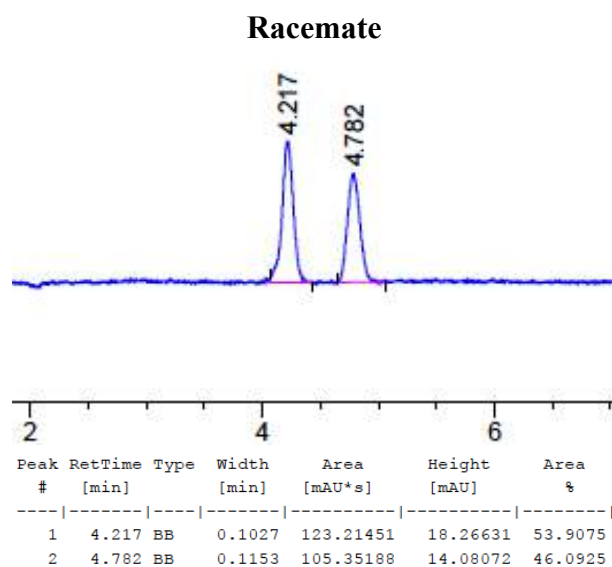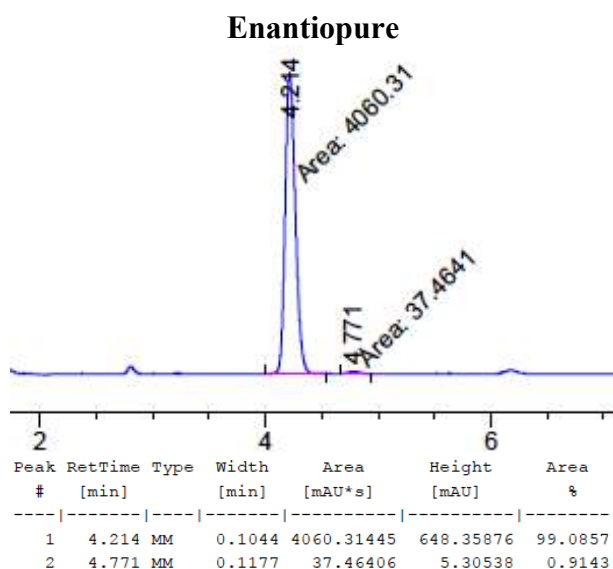

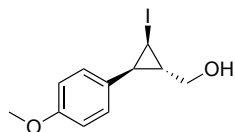

**((1S,2R,3S)-2-iodo-3-(4-methoxyphenyl)cyclopropyl)methanol (4f):** Synthesized according to general procedure **A** using (*E*)-3-(4-methoxyphenyl)prop-2-en-1-ol<sup>6</sup> (166.2 mg, 1.0 mmol) as starting material. Purified by flash column chromatography using a gradient from 15:5 CH<sub>2</sub>Cl<sub>2</sub>/Hexanes to 15:4:1 CH<sub>2</sub>Cl<sub>2</sub>/Hexanes/Et<sub>2</sub>O as eluent. The product was isolated in 67% yield (204.8 mg, 0.67 mmol) as a dark-green oil. The diastereomeric ratio (9:1) was determined by <sup>1</sup>H NMR on the crude mixture. The enantiomeric excess (>99% *ee*) was determined by chiral SFC (Chiralpak AD-H 25 cm, 10% MeOH, 30 °C, 150 bar): t.r.<sub>min</sub> 11.3 min ; t.r.<sub>maj</sub> 7.3 min. The characterization data match the literature.<sup>2</sup>

<sup>1</sup>H NMR (400 MHz, CDCl<sub>3</sub>) δ 7.11 (d, *J* = 8.4 Hz, 2H), 6.87 (d, *J* = 8.8 Hz, 2H), 3.85 – 3.77 (m, 4H), 3.74 (dd, *J* = 11.4, 6.1 Hz, 1H), 2.88 (dd, *J* = 8.1, 4.7 Hz, 1H), 1.99 – 1.91 (m, 1H), 1.84 (qd, *J* = 6.2, 4.7 Hz, 1H), 1.61 (s, 1H). <sup>13</sup>C NMR (101 MHz, CDCl<sub>3</sub>) δ 158.7, 130.7, 130.1, 113.6, 64.8, 55.4, 30.6, 25.4, -1.9.

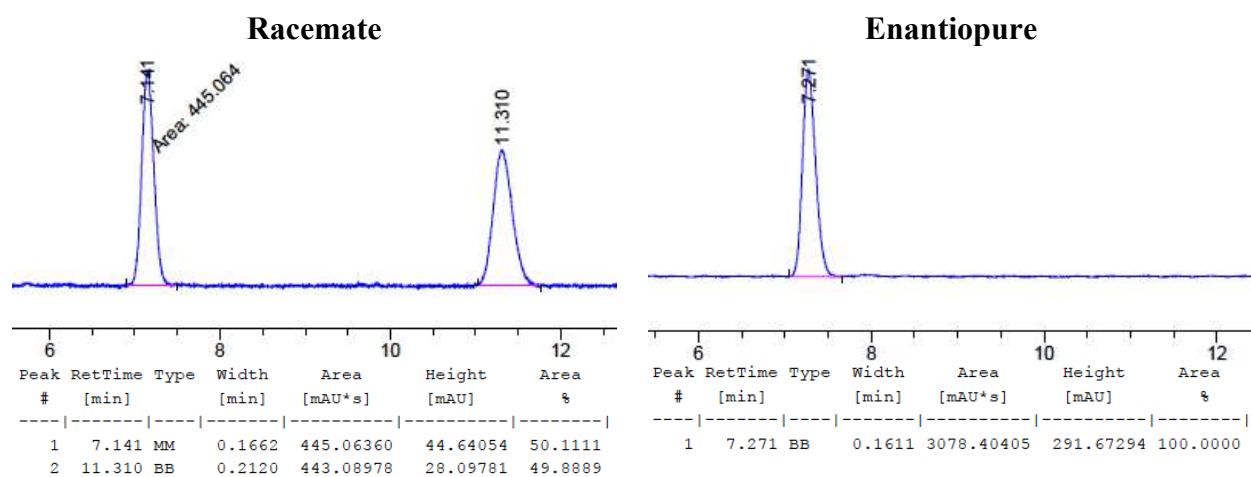

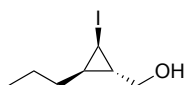

**((1S,2R,3R)-2-iodo-3-propylcyclopropyl)methanol (4g):** Synthesized according to general procedure **A** using (*E*)-2-Hexen-1-ol (0.12 mL, 1.0 mmol) as starting material. Purified by flash column chromatography using a gradient from 15:5 CH<sub>2</sub>Cl<sub>2</sub>/Hexanes to 15:4:1 CH<sub>2</sub>Cl<sub>2</sub>/Hexanes/Et<sub>2</sub>O as eluent. The product was isolated in 65 % yield (157.1 mg, 0.65 mmol) as a yellow oil. The diastereomeric ratio (6:1) was determined by <sup>1</sup>H NMR on the crude mixture. The enantiomeric excess (94% *ee*) was determined by chiral SFC (Chiralpak AD-H 25 cm, 8% iPrOH, 30 °C, 150 bar): t.r.<sub>min</sub> 3.1 min ; t.r.<sub>maj</sub> 3.6 min. The characterization data match the literature.<sup>2</sup>

<sup>1</sup>H NMR (400 MHz, CDCl<sub>3</sub>) δ 3.59 (dd, *J* = 11.4, 6.4 Hz, 1H), 3.54 (dd, *J* = 11.4, 6.6 Hz, 1H), 2.54 (dd, *J* = 7.8, 4.3 Hz, 1H), 1.63 – 1.33 (m, 5H), 1.13 (qd, *J* = 6.3, 4.4 Hz, 1H), 0.97 (t, *J* = 7.0 Hz, 3H), 0.54 – 0.41 (m, 1H). <sup>13</sup>C NMR (101 MHz, CDCl<sub>3</sub>) δ 65.3, 36.5, 31.7, 21.9, 20.9, 14.0, -4.0.

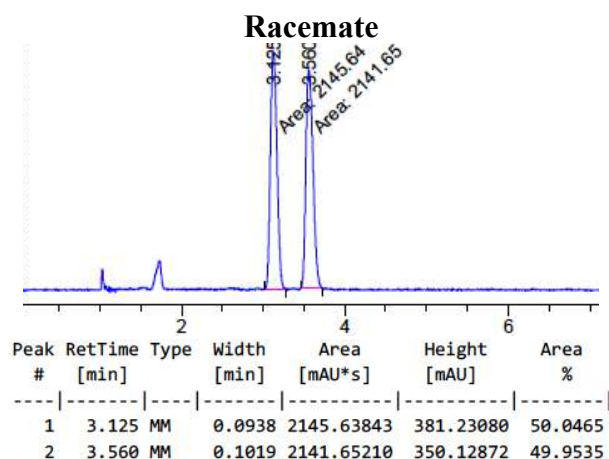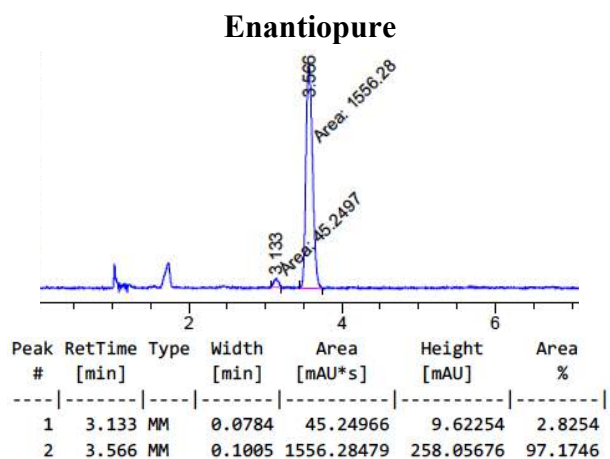

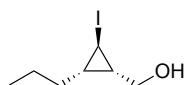

**((1*S*,2*R*,3*S*)-2-iodo-3-propylcyclopropyl)methanol (4h):** Synthesized according to general procedure **A** using (*Z*)-Hex-2-en-1-ol (0.12 mL, 1.0 mmol) as starting material. Purified by flash column chromatography using a gradient from 0 to 30% Et<sub>2</sub>O in Hexanes as eluent. The product was isolated in 50% yield (121.3 mg, 0.50 mmol) as an orange oil. The diastereomeric ratio (3:1) was determined by <sup>1</sup>H NMR on the crude mixture. The enantiomeric excess (>99% *ee*) was determined by SFC (Chiralpak AD-H 25 cm, 5% iPrOH, 30 °C, 150 bar): t.r.<sub>min</sub> 6.1 min; t.r.<sub>maj</sub> 4.5 min. The characterization data match the literature.<sup>2</sup>

<sup>1</sup>H NMR (400 MHz, CDCl<sub>3</sub>) δ 3.72 (dd, *J* = 11.6, 6.9 Hz, 1H), 3.62 (dd, *J* = 11.6, 7.8 Hz, 1H), 2.05 (app. t, *J* = 4.1 Hz, 1H), 1.59 – 1.19 (m, 8H), 0.96 (dd, *J* = 9.5, 4.9 Hz, 3H). <sup>13</sup>C NMR (101 MHz, CDCl<sub>3</sub>) δ 61.5, 30.2, 29.8, 28.4, 22.6, 14.1, -11.9.

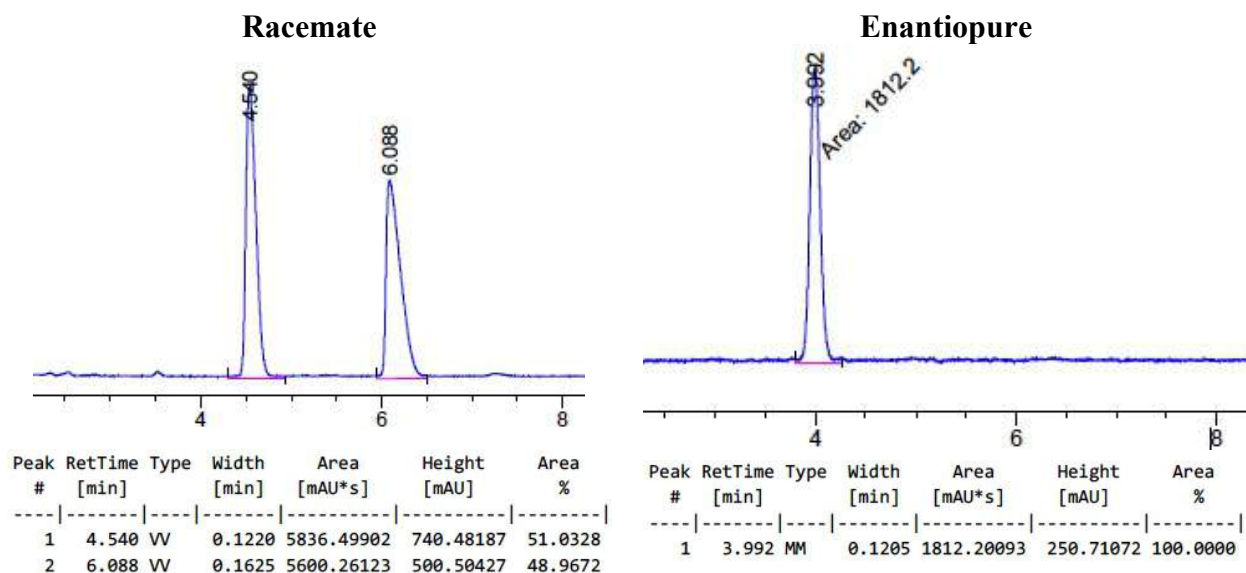

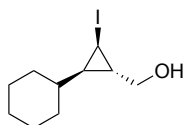

**((1S,2R,3R)-2-iodo-3-cyclohexylcyclopropyl)methanol (4i):** Synthesized according to general procedure A using (*E*)-3-cyclohexylprop-2-en-1-ol<sup>6</sup> (145.6 mg, 1.0 mmol) as starting material. Purified by flash column chromatography using a gradient from 15:5 CH<sub>2</sub>Cl<sub>2</sub>/Hexanes to 15:4:1 CH<sub>2</sub>Cl<sub>2</sub>/Hexanes/Et<sub>2</sub>O as eluent. The product was isolated in 56% yield (163.8 mg, 0.58 mmol) as an orange oil. The diastereomeric ratio (5:1) was determined by <sup>1</sup>H NMR on the crude mixture. The enantiomeric excess (95% *ee*) was determined by chiral SFC-MS (Chiralpak AD-H 25 cm, 15% MeOH, 30 °C, 150 bar): t.r.<sub>min</sub> 4.0 min ; t.r.<sub>maj</sub> 2.4 min. The characterization data match the literature.<sup>2</sup>

<sup>1</sup>H NMR (400 MHz, CDCl<sub>3</sub>) δ 3.61 – 3.46 (m, 2H), 2.52 (dd, *J* = 7.7, 4.3 Hz, 1H), 2.02 – 1.88 (m, 1H), 1.85 – 1.60 (m, 4H), 1.38 (s, 1H), 1.34 – 1.10 (m, 5H), 1.05 – 0.89 (m, 2H), 0.21 (ddd, *J* = 9.2, 7.8, 6.2 Hz, 1H). <sup>13</sup>C NMR (101 MHz, CDCl<sub>3</sub>) δ 65.5, 42.9, 32.6, 31.8, 30.8, 27.1, 26.5, 26.3, 25.8, -5.1.

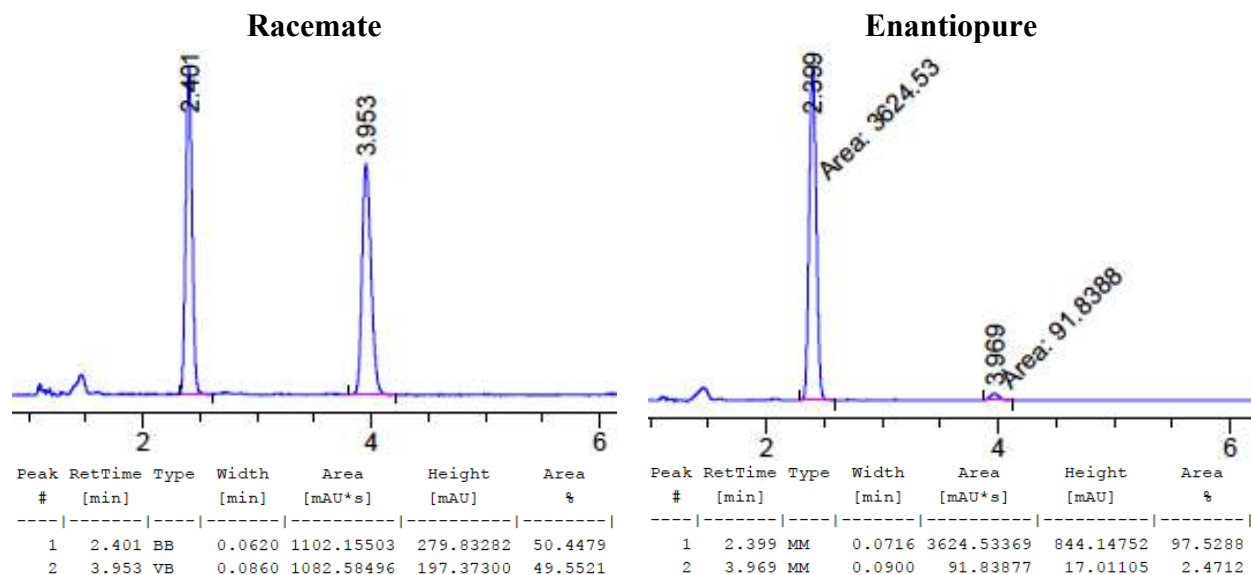

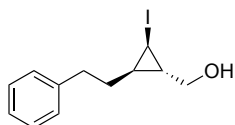

**((1S,2R,3S)-2-iodo-3-phenethylcyclopropyl)methanol (4j):** Synthesized according to general procedure **A** using (*E*)-5-phenylpent-2-en-1-ol<sup>6</sup> (161.0 mg, 1.0 mmol) as starting material. Purified by flash column chromatography using a gradient from 15:5 CH<sub>2</sub>Cl<sub>2</sub>/Hexanes to 15:4:1 CH<sub>2</sub>Cl<sub>2</sub>/Hexanes/Et<sub>2</sub>O as eluent. The product was isolated in 61% yield (184.0 mg, 0.61 mmol) as a yellow oil. The diastereomeric ratio (4:1) was determined by <sup>1</sup>H NMR on the crude mixture. The enantiomeric excess (96% *ee*) was determined by chiral SFC (Chiralpak AD-H 25cm, 15% MeOH, 30 °C, 150 bar): *tr*<sub>min</sub>: 6.3 min; *tr*<sub>maj</sub>: 4.1 min.

**<sup>1</sup>H NMR (500 MHz, CDCl<sub>3</sub>)** δ 7.30 (t, *J* = 7.5 Hz, 2H), 7.21 (dd, *J* = 15.8, 7.3 Hz, 3H), 3.52 (dd, *J* = 11.4, 6.4 Hz, 1H), 3.48 (dd, *J* = 11.4, 6.5 Hz, 1H), 2.86 (dt, *J* = 14.2, 7.3 Hz, 1H), 2.71 (dt, *J* = 13.7, 8.0 Hz, 1H), 2.54 (dd, *J* = 7.8, 4.3 Hz, 1H), 1.79 (dd, *J* = 14.9, 7.3 Hz, 2H), 1.35 (br s, 1H), 1.11 (qd, *J* = 6.3, 4.4 Hz, 1H), 0.49 (dt, *J* = 13.8, 6.9 Hz, 1H). **<sup>13</sup>C NMR (126 MHz, CDCl<sub>3</sub>)** δ 141.7 (Cq), 128.7 (CH), 128.5 (CH), 126.1 (CH), 65.0 (CH<sub>2</sub>), 36.3 (CH<sub>2</sub>), 34.7 (CH<sub>2</sub>), 31.8 (CH), 20.55 (CH), -4.6 (CH). **FTIR (cm<sup>-1</sup>) (neat):** 3318, 2921, 2855, 1601, 1450, 1232, 1021, 745, 698. **HRMS (ESI, Pos)** calculated for C<sub>12</sub>H<sub>15</sub>IO<sub>2</sub>Na [M+Na]<sup>+</sup>: 325.00598 *m/z*, found 325.00522 *m/z*. [*a*]<sub>D</sub><sup>20</sup> = -9.9 (c 0.97, CHCl<sub>3</sub>). **R<sub>f</sub>** = 0.31 (30% AcOEt in Hexanes).

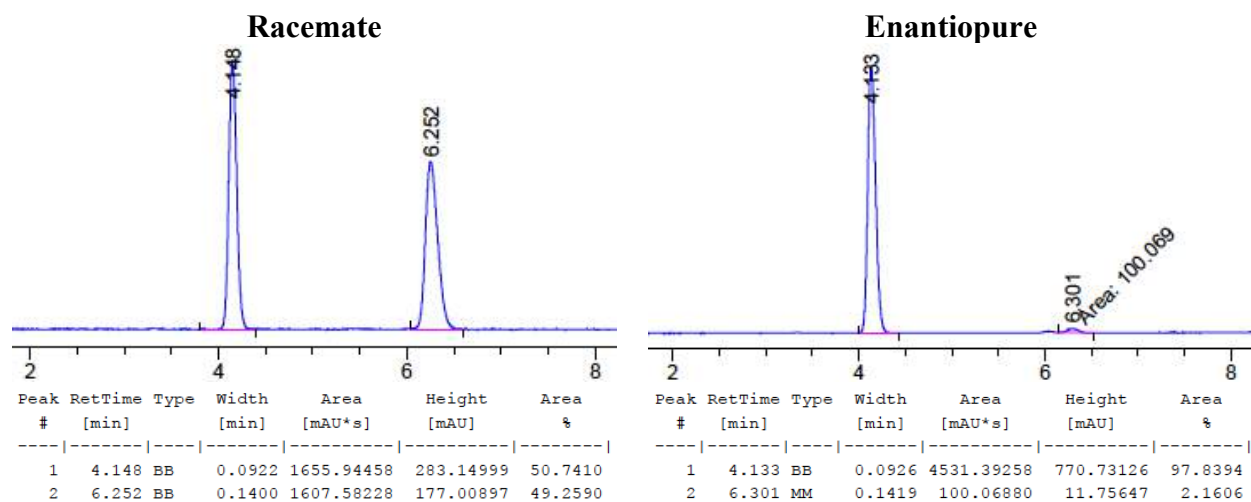

This product was also synthesized on a gram-scale using (*E*)-5-phenylpent-2-en-1-ol (1.005 g, 6.2 mmol). The product was isolated in 56% yield (1.04 g, 3.4 mmol).

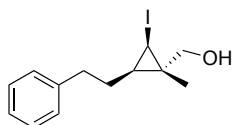

**((1S,2R,3R)-2-iodo-1-methyl-3-phenethylcyclopropyl)methanol (4k):** Synthesized according to general procedure A using (*E*)-2-methyl-5-phenylpent-2-en-1-ol<sup>7</sup> (178.6 mg, 1.0 mmol) as starting material. Purified by flash column chromatography using a gradient from 15:5 CH<sub>2</sub>Cl<sub>2</sub>/Hexanes to 15:4:1 CH<sub>2</sub>Cl<sub>2</sub>/Hexanes/Et<sub>2</sub>O as eluent. The product was isolated in 64% yield (205.0 mg, 0.65 mmol) as a clear orange oil. The diastereomeric ratio (20:1) was determined by <sup>1</sup>H NMR on the crude mixture. The enantiomeric excess (92% *ee*) was determined by chiral SFC (Chiralpak AD-H 25cm, 10% MeOH, 30 °C, 150 bar): *tr*<sub>min</sub>: 7.5 min; *tr*<sub>maj</sub>: 5.8 min. The characterization data match the literature.<sup>2</sup>

<sup>1</sup>H NMR (400 MHz, CDCl<sub>3</sub>) δ 7.39 – 7.27 (m, 2H), 7.25 – 7.15 (m, 3H), 3.51 – 3.30 (m, 2H), 2.84 (d, *J* = 8.2 Hz, 1H), 2.81 – 2.73 (m, 1H), 2.64 (ddd, *J* = 13.6, 8.9, 7.1 Hz, 1H), 1.74 – 1.54 (m, 2H), 1.44 (s, 1H), 1.08 (s, 3H), 0.71 (dd, *J* = 15.0, 7.1 Hz, 1H). <sup>13</sup>C NMR (101 MHz, CDCl<sub>3</sub>) δ 141.9, 128.7, 128.5, 126.1, 70.3, 34.9, 31.8, 25.0, 23.2, 16.8, 8.0.

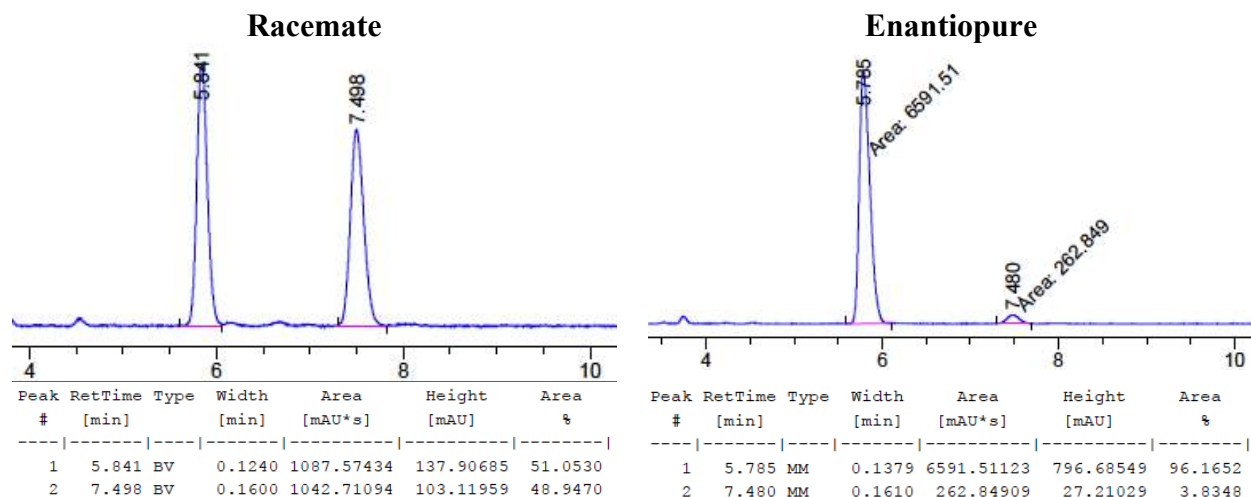

## Cross-coupling Products

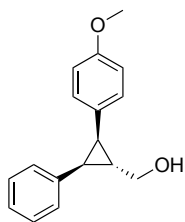

**((1R,2R,3S)-2-(4-methoxyphenyl)-3-phenylcyclopropyl)methanol (5a):** Synthesized according to general procedure **D** using ((1S,2R,3S)-2-iodo-3-phenylcyclopropyl)methanol (**4a**) (104.4 mg, 0.38 mmol) as starting material. Purified by flash column chromatography using a gradient from 10% to 20% of EtOAc in Hexanes as eluent. The product was isolated in 52% yield (47.0 mg, 0.18 mmol) as a yellowish solid (**mp**: 88-90 °C).

**<sup>1</sup>H NMR (400 MHz, CDCl<sub>3</sub>)** δ 7.15 – 7.02 (m, 3H), 6.95 – 6.89 (m, 2H), 6.89 – 6.83 (m, 2H), 6.70 – 6.61 (m, 2H), 3.84 (d, *J* = 6.6 Hz, 2H), 3.71 (s, 3H), 2.45 – 2.28 (m, 2H), 2.11 – 1.94 (m, 1H), 1.62 (s, 1H). **<sup>13</sup>C NMR (101 MHz, CDCl<sub>3</sub>)** δ 157.92 (Cq), 137.74 (Cq), 130.20 (CH), 129.33 (Cq), 128.92 (CH), 127.92 (CH), 125.88 (CH), 113.44 (CH), 66.57 (CH<sub>2</sub>), 55.26 (CH<sub>3</sub>), 29.34 (CH), 29.16 (CH), 28.06 (CH). **FTIR (cm<sup>-1</sup>) (neat):** 3285, 2912, 2833, 1513, 1458, 1247, 1018, 737, 696, 541. **HRMS (ESI, Pos)** calculated for C<sub>17</sub>H<sub>18</sub>O<sub>2</sub>Na [M+Na]<sup>+</sup>: 277.1199 m/z, found 277.12108 m/z. [ $\alpha$ ]<sub>D</sub><sup>20</sup> = + 22.1 (c 0.51, CHCl<sub>3</sub>). **R<sub>f</sub>** = 0.10 (20% AcOEt in Hexanes).

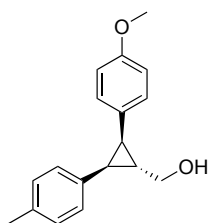

**((1R,2R,3S)-2-(4-methoxyphenyl)-3-(p-tolyl)cyclopropyl)methanol (5b):** Synthesized according to general procedure **D** using ((1S,2R,3S)-2-iodo-3-(p-tolyl)cyclopropyl)methanol (**4b**) (110.1 mg, 0.38 mmol) as starting material. Purified by flash column chromatography using a gradient from 10% to 20% of EtOAc in Hexanes as eluent. The product was isolated in 38% yield (39.0 mg, 0.15 mmol) as an orange oil.

**<sup>1</sup>H NMR (400 MHz, CDCl<sub>3</sub>)** δ 6.92 (d, *J* = 7.9 Hz, 2H), 6.89 – 6.84 (m, 2H), 6.80 (d, *J* = 8.1 Hz, 2H), 6.70 – 6.63 (m, 2H), 3.86 – 3.77 (m, 2H), 3.72 (s, 3H), 2.37 – 2.25 (m, 2H), 2.23 (s, 3H), 2.03 – 1.92 (m, 1H), 1.67 (br, 1H). **<sup>13</sup>C NMR (101 MHz, CDCl<sub>3</sub>)** δ 157.87 (Cq), 135.32 (Cq), 134.56 (Cq), 130.16 (CH), 129.54 (Cq), 128.79 (CH), 128.66 (CH), 113.43 (CH), 66.66 (CH<sub>2</sub>), 55.26 (CH<sub>3</sub>), 29.06 (CH), 29.02 (CH), 28.11 (CH), 21.10 (CH<sub>3</sub>). **FTIR (cm<sup>-1</sup>) (neat):** 3336, 3005, 2921, 1513, 1245, 1031, 827, 767, 526. **HRMS (ESI, Pos)** calculated for C<sub>18</sub>H<sub>20</sub>O<sub>2</sub>Na [M+Na]<sup>+</sup>: 291.13555 m/z, found 291.13599 m/z. [ $\alpha$ ]<sub>D</sub><sup>20</sup> = + 14.7 (c 0.46, CHCl<sub>3</sub>). **R<sub>f</sub>** = 0.12 (20% AcOEt in Hexanes).



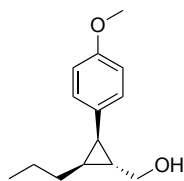

**((1R,2R,3S)-2-(4-methoxyphenyl)-3-propylcyclopropyl)methanol (5g):** Synthesized according to general procedure **D** using ((1S,2R,3R)-2-iodo-3-propylcyclopropyl)methanol (**4g**) (93.3 mg, 0.39 mmol) as starting material. Purified by flash column chromatography using a gradient from 10% to 20% of EtOAc in Hexanes as eluent. The product was isolated in 74% yield (63.0 mg, 0.29 mmol) as a yellow oil.

**<sup>1</sup>H NMR (400 MHz, CDCl<sub>3</sub>)** δ 7.10 (d, *J* = 8.5 Hz, 2H), 6.81 (d, *J* = 8.6 Hz, 2H), 3.79 (s, 3H), 3.63 (d, *J* = 6.9 Hz, 2H), 2.01 – 1.89 (m, *J* = 9.0, 5.2 Hz, 1H), 1.47 (s, 1H), 1.38 – 1.24 (m, 3H), 1.19 (dd, *J* = 13.7, 8.0 Hz, 1H), 1.02 – 0.86 (m, 2H), 0.81 (t, *J* = 7.3 Hz, 3H). **<sup>13</sup>C NMR (101 MHz, CDCl<sub>3</sub>)** δ 157.94 (Cq), 130.61 (Cq), 130.05 (CH), 113.54 (CH), 67.03 (CH<sub>2</sub>), 55.38 (CH<sub>3</sub>), 30.10 (CH<sub>2</sub>), 26.52 (CH), 25.94 (CH), 24.45 (CH), 22.71 (CH<sub>2</sub>), 14.07 (CH<sub>3</sub>). **FTIR (cm<sup>-1</sup>) (neat):** 3348, 2955, 2927, 1512, 1244, 1031, 830. **HRMS (ESI, Pos)** calculated for C<sub>14</sub>H<sub>20</sub>O<sub>2</sub>Na [M+Na]<sup>+</sup>: 243.13555 m/z, found 243.13639 m/z. [α]<sub>D</sub><sup>20</sup> = - 94.6 (c 1.15, CHCl<sub>3</sub>). **R<sub>f</sub>** = 0.19 (20% AcOEt in Hexanes).

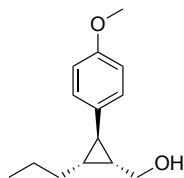

**((1R,2R,3R)-2-(4-methoxyphenyl)-3-propylcyclopropyl)methanol (5h):** Synthesized according to general procedure **D** using ((1S,2R,3S)-2-iodo-3-propylcyclopropyl)methanol (**4h**) (74.6 mg, 0.31 mmol) as starting material. Purified by flash column chromatography using a gradient from 10% to 20% of EtOAc in Hexanes as eluent. The product was isolated in 39% yield (27.0 mg, 0.12 mmol) as a yellow oil.

**<sup>1</sup>H NMR (400 MHz, CDCl<sub>3</sub>)** δ 7.03 – 6.95 (m, 2H), 6.84 – 6.77 (m, 2H), 3.83 (dd, *J* = 11.4, 6.7 Hz, 1H), 3.78 (s, 3H), 3.75 – 3.66 (m, 1H), 1.65 – 1.54 (m, 1H), 1.54 – 1.41 (m, 5H), 1.42 – 1.32 (m, 1H), 1.22 – 1.11 (m, 1H), 0.95 (t, *J* = 7.2 Hz, 3H). **<sup>13</sup>C NMR (101 MHz, CDCl<sub>3</sub>)** δ 157.81 (Cq), 134.98 (Cq), 127.03 (CH), 113.96 (CH), 62.79 (CH<sub>2</sub>), 55.48 (CH<sub>3</sub>), 30.74 (CH<sub>2</sub>), 29.14 (CH), 27.87 (CH), 27.43 (CH), 23.28 (CH<sub>2</sub>), 14.19 (CH<sub>3</sub>). **FTIR (cm<sup>-1</sup>) (neat):** 3342, 2955, 2870, 1513, 1463, 1243, 1031, 824, 524. **HRMS (ESI, Pos)** calculated for C<sub>14</sub>H<sub>20</sub>O<sub>2</sub>Na [M+Na]<sup>+</sup>: 243.13555 m/z, found 243.1363 m/z. [α]<sub>D</sub><sup>20</sup> = - 11.1 (c 0.20, CHCl<sub>3</sub>). **R<sub>f</sub>** = 0.17 (20% AcOEt in Hexanes).

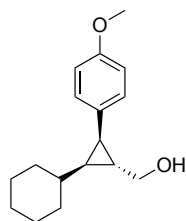

**((1R,2S,3R)-2-cyclohexyl-3-(4-methoxyphenyl)cyclopropyl)methanol (5i):** Synthesized according to general procedure **D** using ((1S,2R,3R)-2-iodo-3-cyclohexylcyclopropyl)methanol (**4i**) (91.0 mg, 0.32 mmol) as starting material. Purified by flash column chromatography using a gradient from 10% to 20% of EtOAc in Hexanes as eluent. The product was isolated in 74% yield (54.0 mg, 0.21 mmol) as a yellow oil.

**<sup>1</sup>H NMR (400 MHz, CDCl<sub>3</sub>)**  $\delta$  7.10 (d,  $J$  = 8.6 Hz, 2H), 6.81 (d,  $J$  = 8.7 Hz, 2H), 3.79 (s, 3H), 3.65 (dd,  $J$  = 11.2, 6.8 Hz, 1H), 3.54 (dd,  $J$  = 11.2, 7.1 Hz, 1H), 1.99 (dd,  $J$  = 9.1, 5.3 Hz, 1H), 1.81 – 1.59 (m, 2H), 1.59 – 1.34 (m, 5H), 1.20 – 1.00 (m, 3H), 0.98 – 0.79 (m, 2H), 0.74 (td,  $J$  = 9.6, 5.2 Hz, 1H), 0.68 – 0.50 (m, 1H). **<sup>13</sup>C NMR (101 MHz, CDCl<sub>3</sub>)**  $\delta$  157.85 (Cq), 130.49 (Cq), 129.73 (CH), 113.50 (CH), 67.10 (CH<sub>2</sub>), 55.37 (CH<sub>3</sub>), 35.77 (CH), 33.51 (CH<sub>2</sub>), 32.57 (CH<sub>2</sub>), 32.01 (CH), 26.51 (CH<sub>2</sub>), 26.29 (CH<sub>2</sub>), 26.22 (CH), 25.99 (CH<sub>2</sub>), 25.02 (CH). **FTIR (cm<sup>-1</sup>) (neat):** 3251, 2919, 2845, 1512, 1246, 1034, 831. **HRMS (ESI, Pos)** calculated for C<sub>17</sub>H<sub>24</sub>O<sub>2</sub>Na [M+Na]<sup>+</sup>: 283.16685 m/z, found 283.16704 m/z.  $[\alpha]_D^{20}$  = - 76.1 (c 0.53, CHCl<sub>3</sub>). **R<sub>f</sub>** = 0.20 (20% AcOEt in Hexanes).

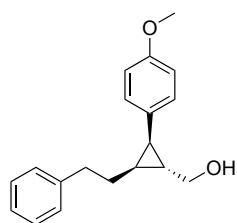

**((1R,2R,3S)-2-(4-methoxyphenyl)-3-phenethylcyclopropyl)methanol (5j):** Synthesized according to general procedure **D** using ((1S,2R,3S)-2-iodo-3-phenethylcyclopropyl)methanol (**4j**) (117.4 mg, 0.39 mmol) as starting material. Purified by flash column chromatography using a gradient from 10% to 20% of EtOAc in Hexanes as eluent. The product was isolated in 80% yield (88.0 mg, 0.31 mmol) as a yellow oil.

**<sup>1</sup>H NMR (500 MHz, CDCl<sub>3</sub>)**  $\delta$  7.27 (dd,  $J$  = 11.9, 4.5 Hz, 2H), 7.19 (t,  $J$  = 7.4 Hz, 1H), 7.16 – 7.11 (m, 2H), 7.08 (d,  $J$  = 7.0 Hz, 2H), 6.88 – 6.82 (m, 2H), 3.82 (s, 3H), 3.65 (dd,  $J$  = 11.2, 6.7 Hz, 1H), 3.56 (dd,  $J$  = 11.2, 7.0 Hz, 1H), 2.75 – 2.49 (m, 2H), 2.01 (dd,  $J$  = 9.2, 5.2 Hz, 1H), 1.55 (dq,  $J$  = 8.3, 6.4 Hz, 1H), 1.46 – 1.23 (m, 3H), 1.07 – 0.97 (m, 1H). **<sup>13</sup>C NMR (126 MHz, CDCl<sub>3</sub>)**  $\delta$  158.03 (Cq), 142.25 (Cq), 130.23 (Cq), 130.01 (CH), 128.56 (CH), 128.41 (CH), 125.89 (CH), 113.64 (CH), 66.76 (CH<sub>2</sub>), 55.40 (CH<sub>3</sub>), 35.64 (CH<sub>2</sub>), 29.98 (CH<sub>2</sub>), 26.53 (CH), 25.74 (CH), 24.12 (CH). **FTIR (cm<sup>-1</sup>) (neat):** 3359, 2927, 2856, 1512, 1454, 1244, 1171, 1030, 833, 749, 698. **HRMS (ESI, Pos)** calculated for C<sub>19</sub>H<sub>22</sub>O<sub>2</sub>Na [M+Na]<sup>+</sup>: 305.1512 m/z, found 305.15185 m/z.  $[\alpha]_D^{20}$  = - 73.0 (c 0.65, CHCl<sub>3</sub>). **R<sub>f</sub>** = 0.12 (20% AcOEt in Hexanes).

The relative stereochemistry was verified by NOE experiment:

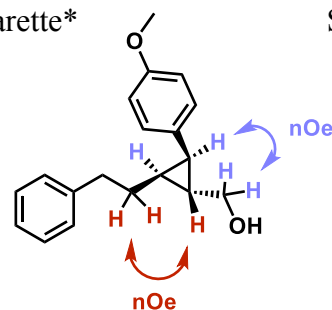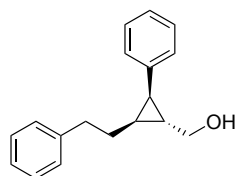

**((1R,2S,3R)-2-phenethyl-3-phenylcyclopropyl)methanol (6a):** Synthesized according to general procedure **D** using ((1S,2R,3S)-2-iodo-3-phenethylcyclopropyl)methanol (**4j**) (92.1 mg, 0.31 mmol) as starting material. Purified by flash column chromatography using 4% of Et<sub>2</sub>O in CH<sub>2</sub>Cl<sub>2</sub> as eluent. The product was isolated in 75% yield (58.0 mg, 0.23 mmol) as a yellow oil.

<sup>1</sup>H NMR (400 MHz, CDCl<sub>3</sub>) δ 7.35 – 7.13 (m, 8H), 7.06 (d, J = 7.0 Hz, 2H), 3.66 (dd, J = 11.2, 6.6 Hz, 1H), 3.57 (dd, J = 11.2, 7.0 Hz, 1H), 2.67 – 2.51 (m, 2H), 2.07 (dd, J = 9.3, 5.3 Hz, 1H), 1.55 (td, J = 14.2, 6.8 Hz, 1H), 1.45 (ddd, J = 11.6, 5.7, 4.2 Hz, 1H), 1.41 – 1.32 (m, 2H), 1.08 (ddd, J = 12.9, 9.2, 7.1 Hz, 1H). <sup>13</sup>C NMR (101 MHz, CDCl<sub>3</sub>) δ 142.19 (Cq), 138.29 (Cq), 129.02 (CH), 128.56 (CH), 128.42 (CH), 128.18 (CH), 126.08 (CH), 125.91 (CH), 66.67 (CH<sub>2</sub>), 35.59 (CH<sub>2</sub>), 29.88 (CH<sub>2</sub>), 26.55 (CH), 26.42 (CH), 24.49 (CH). FTIR (cm<sup>-1</sup>) (neat): 3344, 2922, 2857, 1601, 1495, 1451, 1023, 743, 696. HRMS (ESI, Pos) calculated for C<sub>18</sub>H<sub>24</sub>N<sub>1</sub>O<sub>1</sub> [M+NH<sub>4</sub>]<sup>+</sup>: 270.18524 m/z, found 270.18469 m/z. [α]<sub>D</sub><sup>20</sup> = - 86.0 (c 0.59, CHCl<sub>3</sub>). R<sub>f</sub> = 0.17 (20% AcOEt in Hexanes).

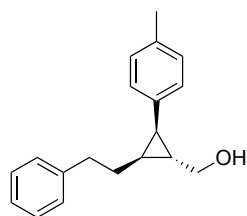

**((1R,2S,3R)-2-phenethyl-3-(p-tolyl)cyclopropyl)methanol (6b):** Synthesized according to general procedure **D** using ((1S,2R,3S)-2-iodo-3-phenethylcyclopropyl)methanol (**4j**) (109.1 mg, 0.36 mmol) as starting material. Purified by flash column chromatography using 4% of Et<sub>2</sub>O in CH<sub>2</sub>Cl<sub>2</sub> as eluent. The product was isolated in 79% yield (76.0 mg, 0.29 mmol) as a yellow solid (mp: 50-52 °C).

<sup>1</sup>H NMR (400 MHz, CDCl<sub>3</sub>) δ 7.31 – 7.24 (m, 2H), 7.22 – 7.16 (m, 1H), 7.15 – 7.04 (m, 6H), 3.66 (dd, J = 11.2, 6.7 Hz, 1H), 3.56 (dd, J = 11.2, 7.0 Hz, 1H), 2.69 – 2.53 (m, 2H), 2.36 (s, 3H), 2.03 (dd, J = 9.3, 5.2 Hz, 1H), 1.64 – 1.50 (m, 1H), 1.45 – 1.26 (m, 4H), 1.11 – 0.97 (m, 1H). <sup>13</sup>C NMR (101 MHz, CDCl<sub>3</sub>) δ 142.25 (Cq), 135.57 (Cq), 135.12 (Cq), 128.91 (CH), 128.89 (CH), 128.59 (CH), 128.41 (CH), 125.90 (CH), 66.78 (CH<sub>2</sub>), 35.62 (CH<sub>2</sub>), 29.87 (CH<sub>2</sub>), 26.47 (CH), 26.16 (CH), 24.31 (CH), 21.14 (CH<sub>3</sub>). FTIR (cm<sup>-1</sup>) (neat): 3320, 2925, 2860, 1448, 1021, 820, 746, 696, 563, 476. HRMS (ESI, Pos) calculated for C<sub>19</sub>H<sub>22</sub>O<sub>1</sub>Na [M+Na]<sup>+</sup>: 289.156286 m/z, found 289.15728 m/z. [α]<sub>D</sub><sup>20</sup> = - 83.4 (c 0.92, CHCl<sub>3</sub>). R<sub>f</sub> = 0.19 (20% AcOEt in Hexanes).

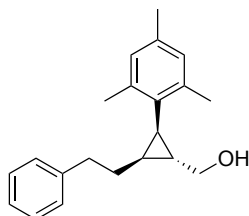

**((1R,2R,3S)-2-mesityl-3-phenethylcyclopropyl)methanol (6c):** Synthesized according to general procedure **D** using ((1S,2R,3S)-2-iodo-3-phenethylcyclopropyl)methanol (**4j**) (111.3 mg, 0.37 mmol) as starting material. Purified by flash column chromatography using 4% of Et<sub>2</sub>O in CH<sub>2</sub>Cl<sub>2</sub> as eluent. The product was isolated in 74% yield (80.0 mg, 0.27 mmol) as a yellow solid (mp: 98-100 °C).

<sup>1</sup>H NMR (500 MHz, CDCl<sub>3</sub>) δ 7.33 – 7.25 (m, 2H), 7.24 – 7.12 (m, 3H), 6.84 (s, 2H), 3.93 (dd, J = 11.3, 5.6 Hz, 1H), 3.46 (dd, J = 11.3, 7.8 Hz, 1H), 2.80 – 2.61 (m, 2H), 2.36 (s, 6H), 2.27 (s, 3H), 1.92 (dtd, J = 10.7, 7.5, 3.4 Hz, 1H), 1.73 (dd, J = 8.5, 6.4 Hz, 1H), 1.39 (s, 1H), 1.27 – 1.18 (m, 1H), 1.18 – 1.07 (m, 1H), 0.79 – 0.64 (m, 1H). <sup>13</sup>C NMR (126 MHz, CDCl<sub>3</sub>) δ 142.15 (Cq), 138.54 (Cq), 135.47 (Cq), 131.87 (Cq), 129.09 (CH), 128.63 (CH), 128.49 (CH), 126.00 (CH), 67.01 (CH<sub>2</sub>), 35.98 (CH<sub>2</sub>), 30.44 (CH<sub>2</sub>), 29.85 (CH), 23.61 (CH), 23.52 (CH), 20.92 (CH<sub>3</sub>). FTIR (cm<sup>-1</sup>) (neat): 3365, 2930, 1601, 1445, 1017, 743, 697. HRMS (ESI, Pos) calculated for C<sub>21</sub>H<sub>30</sub>N<sub>1</sub>O<sub>1</sub> [M+NH<sub>4</sub>]<sup>+</sup>: 312.23219 m/z, found 312.2315 m/z. [α]<sub>D</sub><sup>20</sup> = -103.2 (c 0.56, CHCl<sub>3</sub>). R<sub>f</sub> = 0.26 (20% AcOEt in Hexanes).

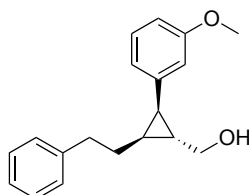

**((1R,2R,3S)-2-(3-methoxyphenyl)-3-phenethylcyclopropyl)methanol (6d):** Synthesized according to general procedure **D** using ((1S,2R,3S)-2-iodo-3-phenethylcyclopropyl)methanol (**4j**) (85.2 mg, 0.28 mmol) as starting material. Purified by flash column chromatography using 4% of Et<sub>2</sub>O in CH<sub>2</sub>Cl<sub>2</sub> as eluent. The product was isolated in 65% yield (52.0 mg, 0.18 mmol) as an orange oil.

<sup>1</sup>H NMR (400 MHz, CDCl<sub>3</sub>) δ 7.32 – 7.14 (m, 4H), 7.08 (d, J = 7.1 Hz, 2H), 6.86 – 6.72 (m, 3H), 3.83 (s, 3H), 3.65 (dd, J = 11.3, 6.6 Hz, 1H), 3.55 (dd, J = 11.2, 7.0 Hz, 1H), 2.69 – 2.53 (m, 2H), 2.04 (dd, J = 9.3, 5.2 Hz, 1H), 1.59 (td, J = 14.3, 6.5 Hz, 1H), 1.50 – 1.25 (m, 3H), 1.07 (dt, J = 14.3, 7.1 Hz, 1H). <sup>13</sup>C NMR (101 MHz, CDCl<sub>3</sub>) δ 159.53 (Cq), 142.18 (Cq), 140.02 (Cq), 129.11 (CH), 128.58 (CH), 128.42 (CH), 125.91 (CH), 121.46 (CH), 115.02 (CH), 111.28 (CH), 66.61 (CH<sub>2</sub>), 55.30 (CH<sub>3</sub>), 35.62 (CH<sub>2</sub>), 29.83 (CH<sub>2</sub>), 26.60 (CH), 26.55 (CH), 24.53 (CH). FTIR (cm<sup>-1</sup>) (neat): 3365, 2925, 2856, 1602, 1582, 1491, 1453, 1315, 1254, 1152, 1040, 747, 696. HRMS (ESI, Pos) calculated for C<sub>19</sub>H<sub>22</sub>O<sub>2</sub>Na [M+Na]<sup>+</sup>: 305.1512 m/z, found 305.15168 m/z. [α]<sub>D</sub><sup>20</sup> = - 82.8 (c 0.60, CHCl<sub>3</sub>). R<sub>f</sub> = 0.13 (20% AcOEt in Hexanes).

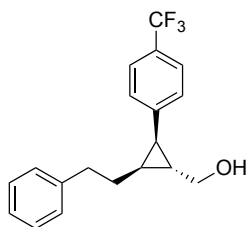**((1R,2S,3R)-2-phenethyl-3-(4-(trifluoromethyl)phenyl)cyclopropyl)methanol (6e):**

Synthesized according to general procedure **D** using ((1S,2R,3S)-2-iodo-3-phenethylcyclopropyl)methanol (**4j**) (100.5 mg, 0.33 mmol) as starting material. Purified by flash column chromatography using 4% of Et<sub>2</sub>O in CH<sub>2</sub>Cl<sub>2</sub> as eluent. The product was isolated in 84% yield (89.0 mg, 0.28 mmol) as a yellowish solid (**mp**: 68-70 °C).

<sup>1</sup>H NMR (500 MHz, CDCl<sub>3</sub>) δ 7.55 (d, *J* = 8.1 Hz, 2H), 7.33 – 7.23 (m, 4H), 7.23 – 7.14 (m, 1H), 7.08 – 7.00 (m, 2H), 3.66 (dd, *J* = 11.3, 6.6 Hz, 1H), 3.60 (dd, *J* = 11.3, 6.8 Hz, 1H), 2.60 (t, *J* = 7.5 Hz, 2H), 2.11 (dd, *J* = 9.4, 5.3 Hz, 1H), 1.54 (td, *J* = 13.9, 7.1 Hz, 1H), 1.50 – 1.44 (m, 1H), 1.36 (dq, *J* = 14.1, 7.8 Hz, 2H), 1.21 – 1.10 (m, 1H). <sup>13</sup>C NMR (126 MHz, CDCl<sub>3</sub>) δ 142.81 (Cq), 141.83 (Cq), 129.18 (CH), 128.51 (CH), 128.20 (Cq), 126.06 (CH), 125.09 (q, CH, *J* = 3.7 Hz), 123.39 (Cq), 66.24 (CH<sub>2</sub>), 35.53 (CH<sub>2</sub>), 29.73 (CH<sub>2</sub>), 26.82 (CH), 26.38 (CH), 24.93 (CH). <sup>19</sup>F NMR (376 MHz, CDCl<sub>3</sub>) δ -63.29. FTIR (cm<sup>-1</sup>) (neat): 3352, 2927, 1617, 1322, 1107, 742, 696. HRMS (ESI, Pos) calculated for C<sub>19</sub>H<sub>18</sub>F<sub>3</sub> [M+H-H<sub>2</sub>O]<sup>+</sup>: 303.13550 m/z, found 303.13612 m/z. [α]<sub>D</sub><sup>20</sup> = - 81.8 (c 1.07, CHCl<sub>3</sub>). **Rf** = 0.13 (20% AcOEt in Hexanes).

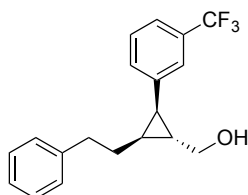**((1R,2S,3R)-2-phenethyl-3-(3-(trifluoromethyl)phenyl)cyclopropyl)methanol (6f):**

Synthesized according to general procedure **D** using ((1S,2R,3S)-2-iodo-3-phenethylcyclopropyl)methanol (**4j**) (108.6 mg, 0.36 mmol) as starting material. Purified by flash column chromatography using 4% of Et<sub>2</sub>O in CH<sub>2</sub>Cl<sub>2</sub> as eluent. The product was isolated in 72% yield (83.0 mg, 0.26 mmol) as a yellow oil.

<sup>1</sup>H NMR (500 MHz, CDCl<sub>3</sub>) δ 7.51 – 7.45 (m, 2H), 7.44 – 7.36 (m, 2H), 7.30 – 7.23 (m, 2H), 7.19 (ddd, *J* = 7.3, 3.9, 1.2 Hz, 1H), 7.10 – 7.02 (m, 2H), 3.66 (dd, *J* = 11.3, 6.6 Hz, 1H), 3.61 (dd, *J* = 11.3, 6.8 Hz, 1H), 2.61 (t, *J* = 7.6 Hz, 2H), 2.11 (dd, *J* = 9.3, 5.3 Hz, 1H), 1.54 (td, *J* = 14.0, 7.0 Hz, 1H), 1.50 – 1.43 (m, 1H), 1.40 (br, 1H), 1.37 – 1.31 (m, 1H), 1.14 (dddd, *J* = 9.3, 7.8, 6.5, 5.3 Hz, 1H). <sup>13</sup>C NMR (126 MHz, CDCl<sub>3</sub>) δ 141.84 (Cq), 139.57 (Cq), 132.31 (CH), 130.57 (q, Cq), 128.61 (CH), 128.51 (CH), 128.49 (CH), 126.04 (CH), 125.66 (d, *J* = 3.7 Hz, CH), 123.26 (Cq), 122.94 (d, *J* = 3.8 Hz, CH), 66.23 (CH<sub>2</sub>), 35.53 (CH<sub>2</sub>), 29.80 (CH<sub>2</sub>), 26.68 (CH), 26.31 (CH), 24.63 (CH). <sup>19</sup>F NMR (376 MHz, CDCl<sub>3</sub>) δ -63.56. FTIR (cm<sup>-1</sup>) (neat): 3329, 2925, 1603, 1453, 1324, 1119, 1019, 746, 698. HRMS (ESI, Pos) calculated for C<sub>19</sub>H<sub>18</sub>F<sub>3</sub> [M+H-H<sub>2</sub>O]<sup>+</sup>: 303.13550 m/z, found 303.13658 m/z. [α]<sub>D</sub><sup>20</sup> = - 75.1 (c 0.58, CHCl<sub>3</sub>). **Rf** = 0.13 (20% AcOEt in Hexanes).

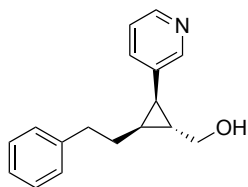

**((1R,2S,3R)-2-phenethyl-3-(pyridin-3-yl)cyclopropyl)methanol (6g):** Synthesized according to general procedure **D** using ((1S,2R,3S)-2-iodo-3-phenethylcyclopropyl)methanol (**4j**) (100.2 mg, 0.33 mmol) as starting material. Purified by flash column chromatography using a gradient from 0% to 10% of MeOH in CH<sub>2</sub>Cl<sub>2</sub> as eluent. The product was isolated in 82% yield (69.0 mg, 0.27 mmol) as a yellow oil.

<sup>1</sup>H NMR (500 MHz, CDCl<sub>3</sub>) δ 8.60 – 8.23 (m, 2H), 7.43 (d, *J* = 7.8 Hz, 1H), 7.25 – 7.08 (m, 4H), 7.07 – 6.96 (m, 2H), 3.66 – 3.54 (m, 2H), 2.60 – 2.53 (m, *J* = 7.6 Hz, 2H), 2.48 (br, 1H), 1.99 (dd, *J* = 9.2, 5.3 Hz, 1H), 1.49 (td, *J* = 14.0, 7.1 Hz, 1H), 1.44 – 1.37 (m, 1H), 1.32 (dq, *J* = 14.1, 7.8 Hz, 1H), 1.16 – 1.06 (m, 1H). <sup>13</sup>C NMR (126 MHz, CDCl<sub>3</sub>) δ 150.39 (CH), 147.10 (CH), 141.74 (Cq), 136.27 (CH), 134.39 (Cq), 128.48 (CH), 128.46 (CH), 126.02 (CH), 123.07 (CH), 65.97 (CH<sub>2</sub>), 35.50 (CH<sub>2</sub>), 29.82 (CH<sub>2</sub>), 26.37 (CH), 24.39 (CH), 23.97 (CH). FTIR (cm<sup>-1</sup>) (neat): 3286, 2923, 2855, 1451, 1415, 1025, 732, 698. HRMS (ESI, Pos) calculated for C<sub>17</sub>H<sub>20</sub>N<sub>1</sub>O<sub>1</sub> [M+H]<sup>+</sup>: 254.15394 m/z, found 254.15325 m/z. [α]<sub>D</sub><sup>20</sup> = - 77.5 (c 0.42, CHCl<sub>3</sub>). Rf = 0.41 (10% MeOH in CH<sub>2</sub>Cl<sub>2</sub>).

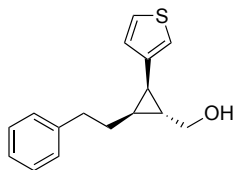

**((1R,2S,3R)-2-phenethyl-3-(thiophen-3-yl)cyclopropyl)methanol (6h):** Synthesized according to general procedure **D** using ((1S,2R,3S)-2-iodo-3-phenethylcyclopropyl)methanol (**4j**) (103.8 mg, 0.34 mmol) as starting material. Purified by flash column chromatography using 4% of Et<sub>2</sub>O in CH<sub>2</sub>Cl<sub>2</sub> as eluent. The product was isolated in 79% yield (70.0 mg, 0.27 mmol) as an orange oil.

<sup>1</sup>H NMR (400 MHz, CDCl<sub>3</sub>) δ 7.28 (ddd, *J* = 7.6, 4.6, 1.6 Hz, 3H), 7.20 (ddd, *J* = 7.3, 3.8, 1.3 Hz, 1H), 7.12 – 7.04 (m, 2H), 6.98 (dd, *J* = 4.9, 1.3 Hz, 1H), 6.95 – 6.90 (m, 1H), 3.65 (dd, *J* = 11.2, 6.7 Hz, 1H), 3.56 (dd, *J* = 11.2, 6.9 Hz, 1H), 2.70 – 2.52 (m, 2H), 2.01 (dd, *J* = 9.0, 5.1 Hz, 1H), 1.62 – 1.43 (m, 2H), 1.40 – 1.27 (m, 2H), 1.03 (dtd, *J* = 9.0, 7.1, 5.2 Hz, 1H). <sup>13</sup>C NMR (101 MHz, CDCl<sub>3</sub>) δ 142.21 (Cq), 139.50 (Cq), 129.00 (CH), 128.55 (CH), 128.44 (CH), 125.92 (CH), 125.20 (CH), 120.78 (CH), 66.54 (CH<sub>2</sub>), 35.65 (CH<sub>2</sub>), 30.02 (CH<sub>2</sub>), 27.88 (CH), 24.24 (CH), 21.84 (CH). FTIR (cm<sup>-1</sup>) (neat): 3340, 2922, 2856, 1451, 1018, 781, 747, 696. HRMS (ESI, Pos) calculated for C<sub>16</sub>H<sub>18</sub>O<sub>1</sub>S<sub>1</sub>Na [M+Na]<sup>+</sup>: 281.09706 m/z, found 281.09721 m/z. [α]<sub>D</sub><sup>20</sup> = - 54.7 (c 0.30, CHCl<sub>3</sub>). Rf = 0.15 (20% AcOEt in Hexanes).

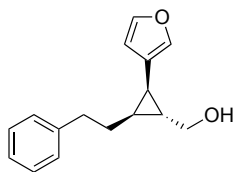

**((1R,2R,3S)-2-(furan-3-yl)-3-phenethylcyclopropyl)methanol (6i):** Synthesized according to general procedure **D** using ((1S,2R,3S)-2-iodo-3-phenethylcyclopropyl)methanol (**4j**) (115.3 mg, 0.38 mmol) as starting material. Purified by flash column chromatography using 20% of EtOAc in petroleum ether as eluent. The product was isolated in 34% yield (31.0 mg, 0.13 mmol) as a yellow oil.

<sup>1</sup>H NMR (400 MHz, CDCl<sub>3</sub>) δ 7.35 (t, *J* = 1.6 Hz, 1H), 7.29 – 7.22 (m, 2H), 7.20 (dt, *J* = 1.7, 0.9 Hz, 1H), 7.17 (ddd, *J* = 7.3, 3.9, 1.3 Hz, 1H), 7.09 (dd, *J* = 7.8, 1.0 Hz, 2H), 6.25 (dd, *J* = 1.7, 0.7 Hz, 1H), 3.59 (dd, *J* = 11.2, 6.7 Hz, 1H), 3.50 (dd, *J* = 11.3, 7.0 Hz, 1H), 2.71 – 2.52 (m, 2H), 1.72 (dd, *J* = 8.9, 5.0 Hz, 1H), 1.62 – 1.43 (m, 2H), 1.23 (br, 1H), 1.11 (tt, *J* = 6.8, 5.1 Hz, 1H), 0.95 (dtd, *J* = 9.0, 7.1, 5.2 Hz, 1H). <sup>13</sup>C NMR (101 MHz, CDCl<sub>3</sub>) δ 142.78 (CH), 142.22 (Cq), 140.09 (CH), 128.57 (CH), 128.47 (CH), 125.96 (CH), 122.67 (Cq), 111.88 (CH), 66.54 (CH<sub>2</sub>), 35.66 (CH<sub>2</sub>), 30.04 (CH<sub>2</sub>), 27.50 (CH), 23.43 (CH), 16.82 (CH). FTIR (cm<sup>-1</sup>) (neat): 3353, 3024, 2923, 1497, 1457, 1021, 748, 697, 597. HRMS (ESI, Pos) calculated for C<sub>16</sub>H<sub>18</sub>O<sub>2</sub> [M+H]<sup>+</sup>: 243.13796 *m/z*, found 243.13829 *m/z*. [α]<sub>D</sub><sup>20</sup> = - 31.5 (c 0.33, CHCl<sub>3</sub>). *R*<sub>f</sub> = 0.13 (20% AcOEt in Hexanes).

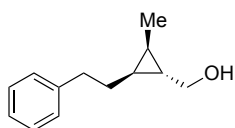

**((1S,2R,3S)-2-methyl-3-phenethylcyclopropyl)methanol (6j):** Synthesized according to general procedure **D** using ((1S,2R,3S)-2-iodo-3-phenethylcyclopropyl)methanol (**4j**) (109.1 mg, 0.36 mmol) as starting material. Purified by flash column chromatography using 4% of Et<sub>2</sub>O in CH<sub>2</sub>Cl<sub>2</sub> as eluent. The product was observed in 36% yield (determined by <sup>1</sup>H NMR) and isolated along with the dehalogenation byproduct.

<sup>1</sup>H NMR (400 MHz, CDCl<sub>3</sub>) (peaks corresponding to the desired product **6j**) δ 7.33 – 7.26 (m, 2H), 7.24 – 7.16 (m, 3H), 3.50 – 3.31 (m, 2H), 2.81 – 2.61 (m, 2H), 1.73 (ddd, *J* = 20.9, 8.4, 6.5 Hz, 1H), 1.68 – 1.48 (m, 1H), 1.32 (br, 1H), 1.06 (d, *J* = 6.2 Hz, 3H), 0.71 (ddt, *J* = 12.3, 10.9, 6.1 Hz, 1H), 0.65 – 0.54 (m, 1H), 0.54 – 0.42 (m, 1H).

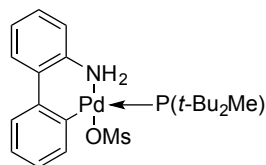

**Precatalyst (2):** Synthesized following procedure E using the  $\mu$ -OMs dimer – 2-ammoniumbiphenyl mesylate (209.3 mg, 0.57 mmol),  $P(t\text{-Bu})_2\text{Me}$  (90.7 mg, 0.57 mmol) and 2.8 mL of THF. The compound **2** was isolated in 89% yield (268.0 mg, 0.51 mmol) as a brown solid (mp: 180–184 °C).

$^1\text{H}$  NMR (500 MHz,  $\text{CDCl}_3$ )  $\delta$  7.43 – 7.39 (m, 1H), 7.37 (d,  $J$  = 7.7 Hz, 1H), 7.24 – 7.20 (m, 2H), 7.16 (dd,  $J$  = 12.2, 4.7 Hz, 2H), 7.09 (td,  $J$  = 7.3, 1.1 Hz, 1H), 7.03 (td,  $J$  = 7.4, 1.4 Hz, 1H), 4.15 (br, 1H), 2.82 (s, 3H), 1.38 (d,  $J$  = 14.0 Hz, 9H), 1.03 (d,  $J$  = 13.9 Hz, 9H), 0.80 (d,  $J$  = 9.0 Hz, 3H).  $^{13}\text{C}$  NMR (126 MHz,  $\text{CDCl}_3$ )  $\delta$  146.93, 139.97, 139.17, 138.35, 138.29, 136.55, 136.53, 128.45, 127.65, 127.63, 127.11, 125.90, 125.47, 125.00, 120.33, 40.11, 34.90, 34.74, 34.67, 34.53, 29.05, 29.02, 28.99, 28.95, 5.64, 5.42. (Observed complexity due to P-C splitting).  $^{31}\text{P}$  NMR (202 MHz,  $\text{CDCl}_3$ )  $\delta$  45.95. FTIR ( $\text{cm}^{-1}$ ) (neat): 3280, 2944, 1571, 1494, 1416, 1366, 1252, 1138, 1035, 772.

<sup>1</sup> Bruno, N. C.; Tudge, M. T.; Buchwald, S. L. *Chem. Sci.* **2013**, 4, 916–920.

<sup>2</sup> Beaulieu, L.-P. B.; Zimmer, L. E.; Charette, A. B. *Chem. – Eur. J.* **2009**, 15, 11829.

<sup>3</sup> Craig, D.; Slavov, N. K. *Chem. Commun.* **2008**, 6054.

<sup>4</sup> Medina, E.; Moyano, A.; Pericàs, M. A.; Riera, A. *Helv. Chim. Acta* **2000**, 83, 972.

<sup>5</sup> Lightburn, T. E.; De Paolis, O. A.; Cheng, K. H.; Tan, K. L. *Org. Lett.* **2011**, 13, 2686.

<sup>6</sup> Charette, A. B.; Molinaro, C.; Brochu, C. *J. Am. Chem. Soc.* **2001**, 123, 12168.

<sup>7</sup> Denmark, S. E.; O'Connor, S. P. *J. Org. Chem.* **1997**, 62, 584.



# **X-Ray Data**

X-Ray Data for Compound **2**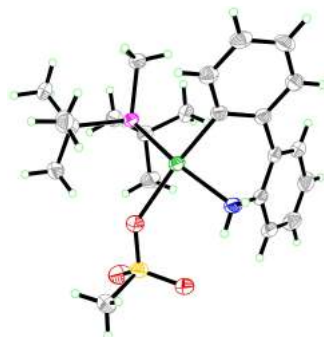**Table 1 Crystal data and structure refinement for SYLV22.**

|                                             |                                                                   |
|---------------------------------------------|-------------------------------------------------------------------|
| Identification code                         | SYLV22                                                            |
| Empirical formula                           | C <sub>22</sub> H <sub>34</sub> N <sub>2</sub> O <sub>3</sub> SPd |
| Formula weight                              | 529.93                                                            |
| Temperature/K                               | 100                                                               |
| Crystal system                              | triclinic                                                         |
| Space group                                 | P-1                                                               |
| a/Å                                         | 9.1931(5)                                                         |
| b/Å                                         | 11.6107(6)                                                        |
| c/Å                                         | 12.2025(6)                                                        |
| α/°                                         | 76.780(2)                                                         |
| β/°                                         | 86.549(2)                                                         |
| γ/°                                         | 67.313(2)                                                         |
| Volume/Å <sup>3</sup>                       | 1169.28(11)                                                       |
| Z                                           | 2                                                                 |
| ρ <sub>calc</sub> /g/cm <sup>3</sup>        | 1.505                                                             |
| μ/mm <sup>-1</sup>                          | 5.353                                                             |
| F(000)                                      | 548.0                                                             |
| Crystal size/mm <sup>3</sup>                | 0.2 × 0.16 × 0.02                                                 |
| Radiation                                   | GaKα (λ = 1.34139)                                                |
| 2θ range for data collection/°              | 6.476 to 108.058                                                  |
| Index ranges                                | -11 ≤ h ≤ 11, -13 ≤ k ≤ 14, -14 ≤ l ≤ 14                          |
| Reflections collected                       | 27434                                                             |
| Independent reflections                     | 4278 [R <sub>int</sub> = 0.0501, R <sub>sigma</sub> = 0.0300]     |
| Data/restraints/parameters                  | 4278/0/276                                                        |
| Goodness-of-fit on F <sup>2</sup>           | 1.075                                                             |
| Final R indexes [I ≥ 2σ (I)]                | R <sub>1</sub> = 0.0259, wR <sub>2</sub> = 0.0659                 |
| Final R indexes [all data]                  | R <sub>1</sub> = 0.0264, wR <sub>2</sub> = 0.0663                 |
| Largest diff. peak/hole / e Å <sup>-3</sup> | 1.18/-0.42                                                        |

# NMR Spectra

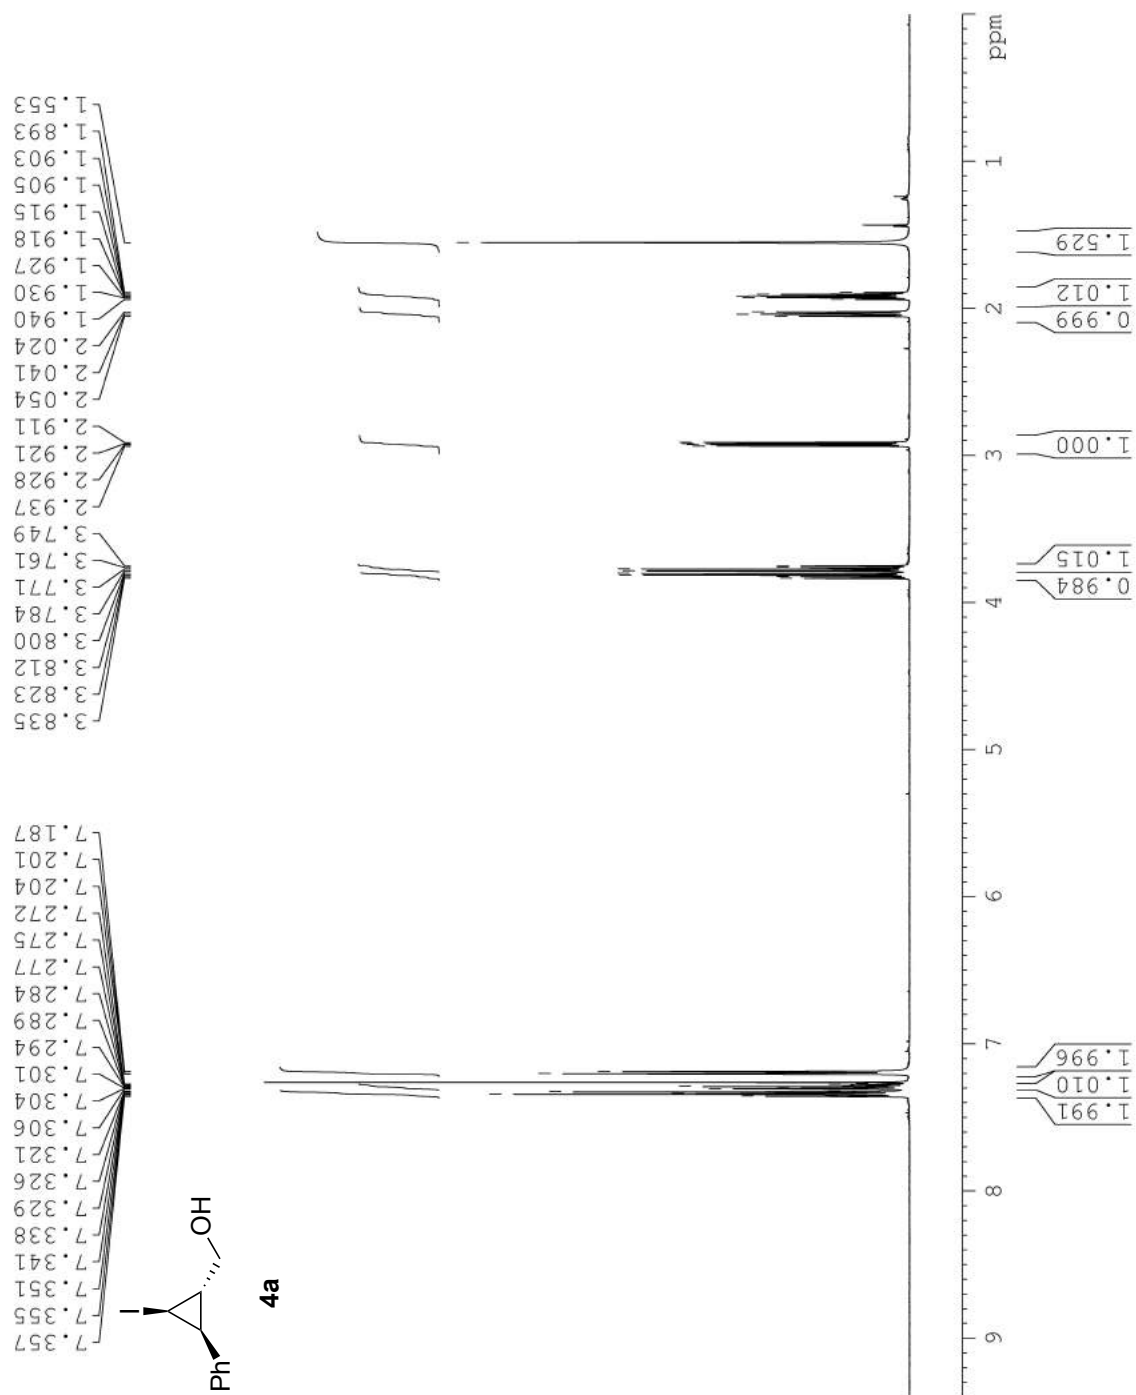

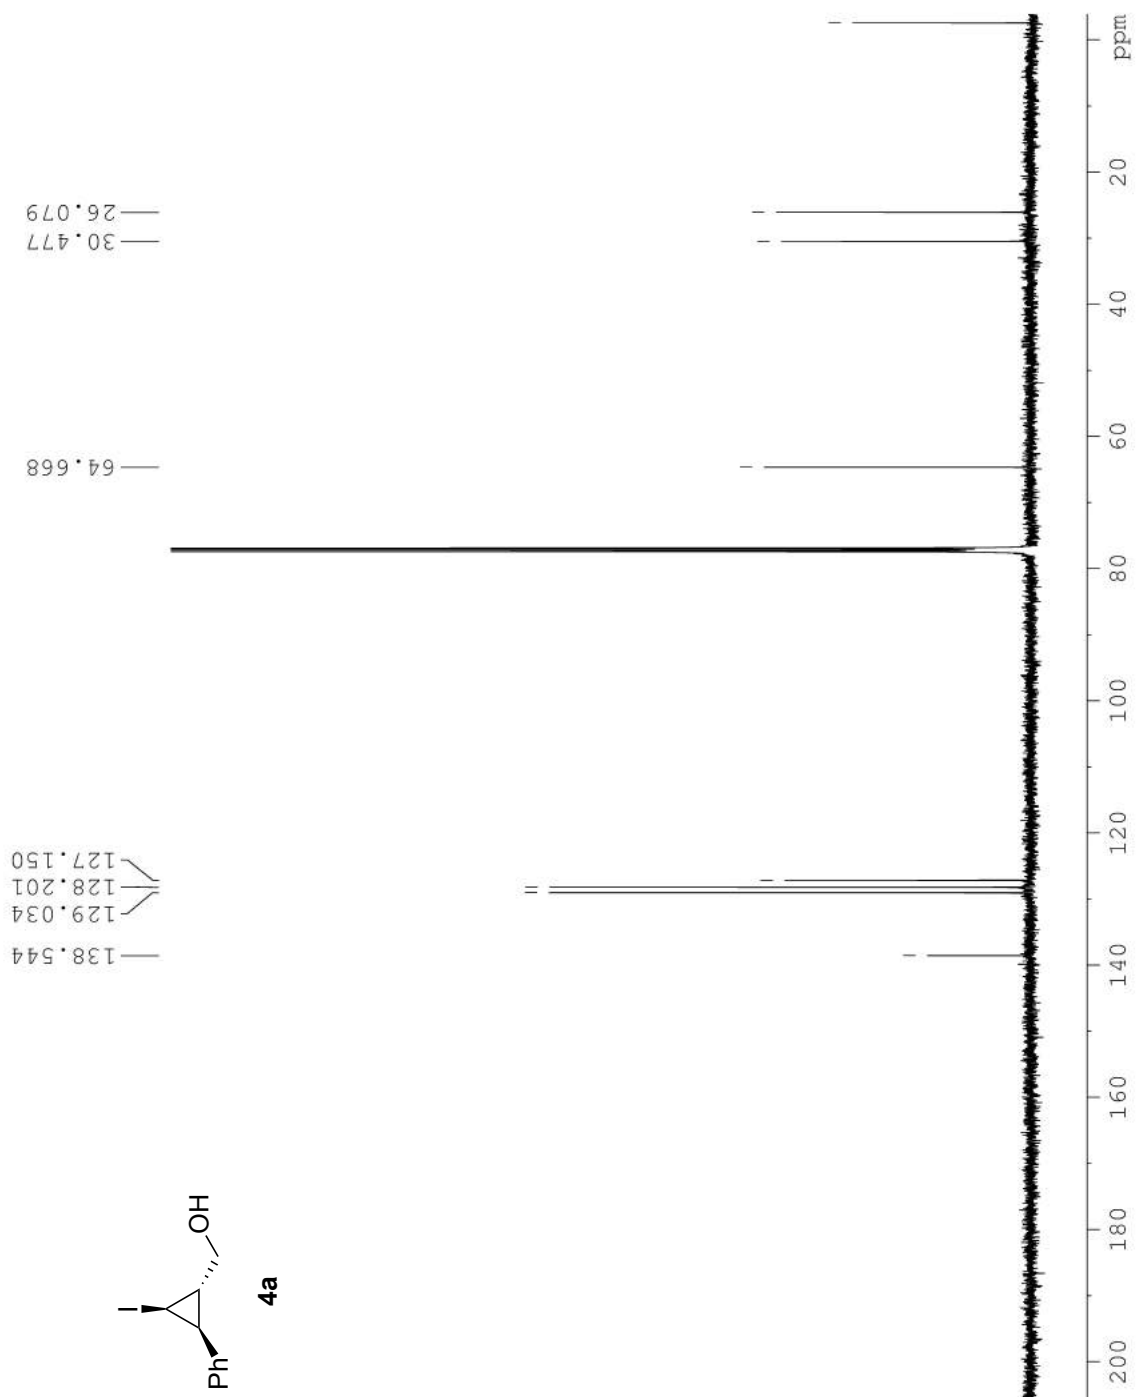

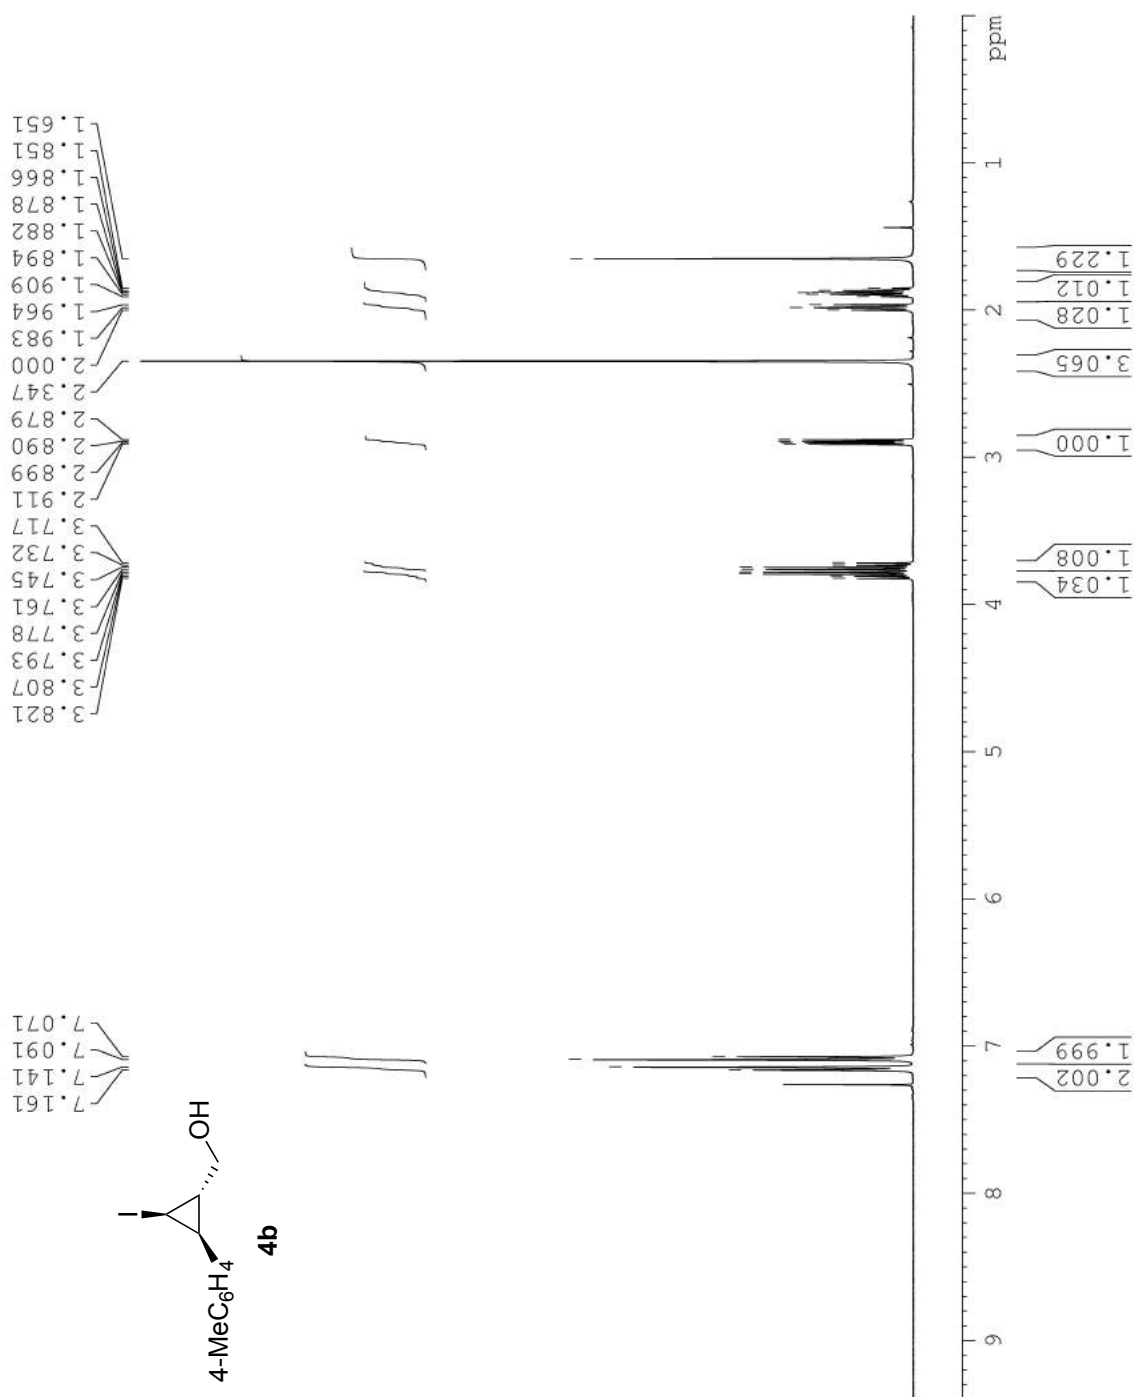

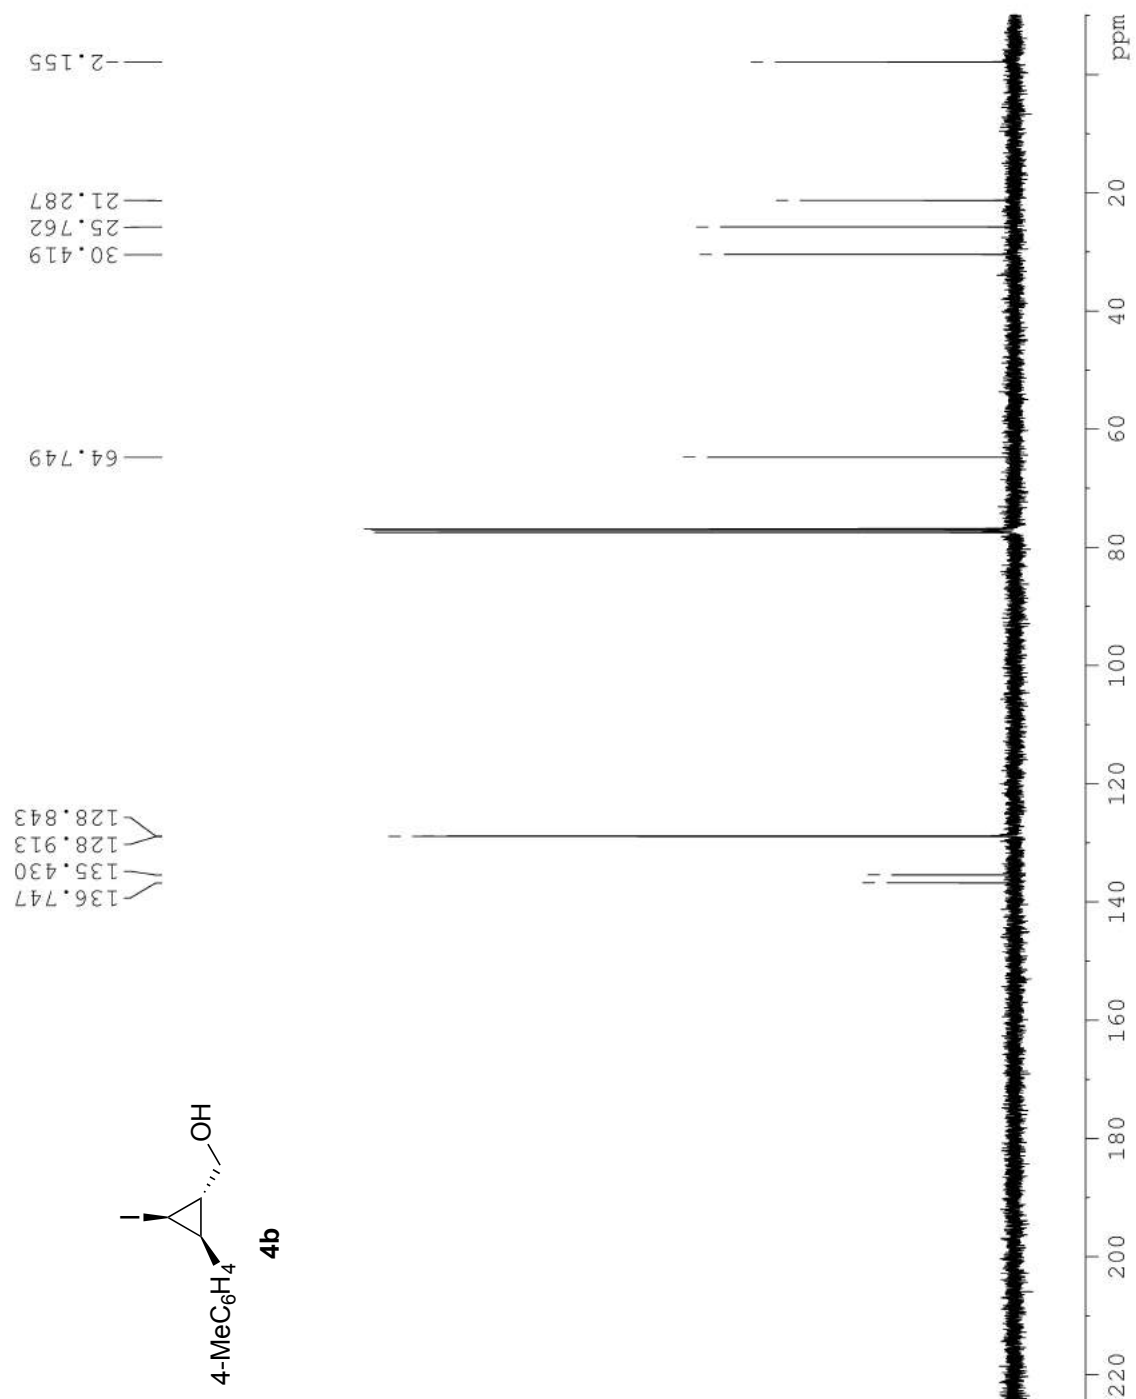

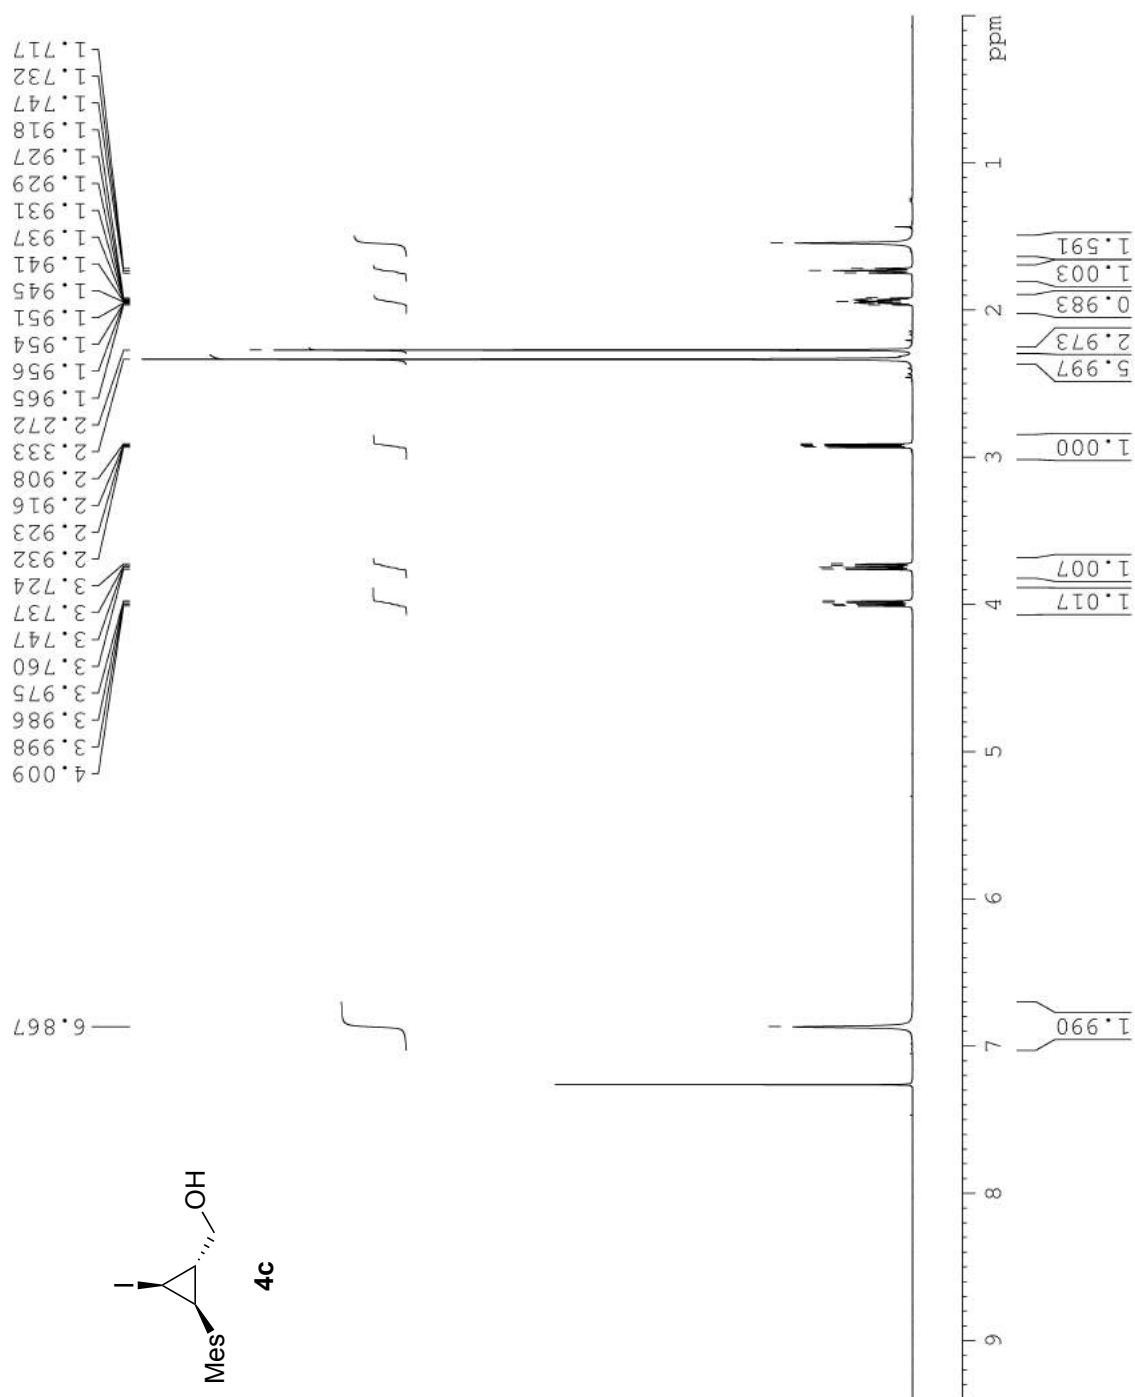



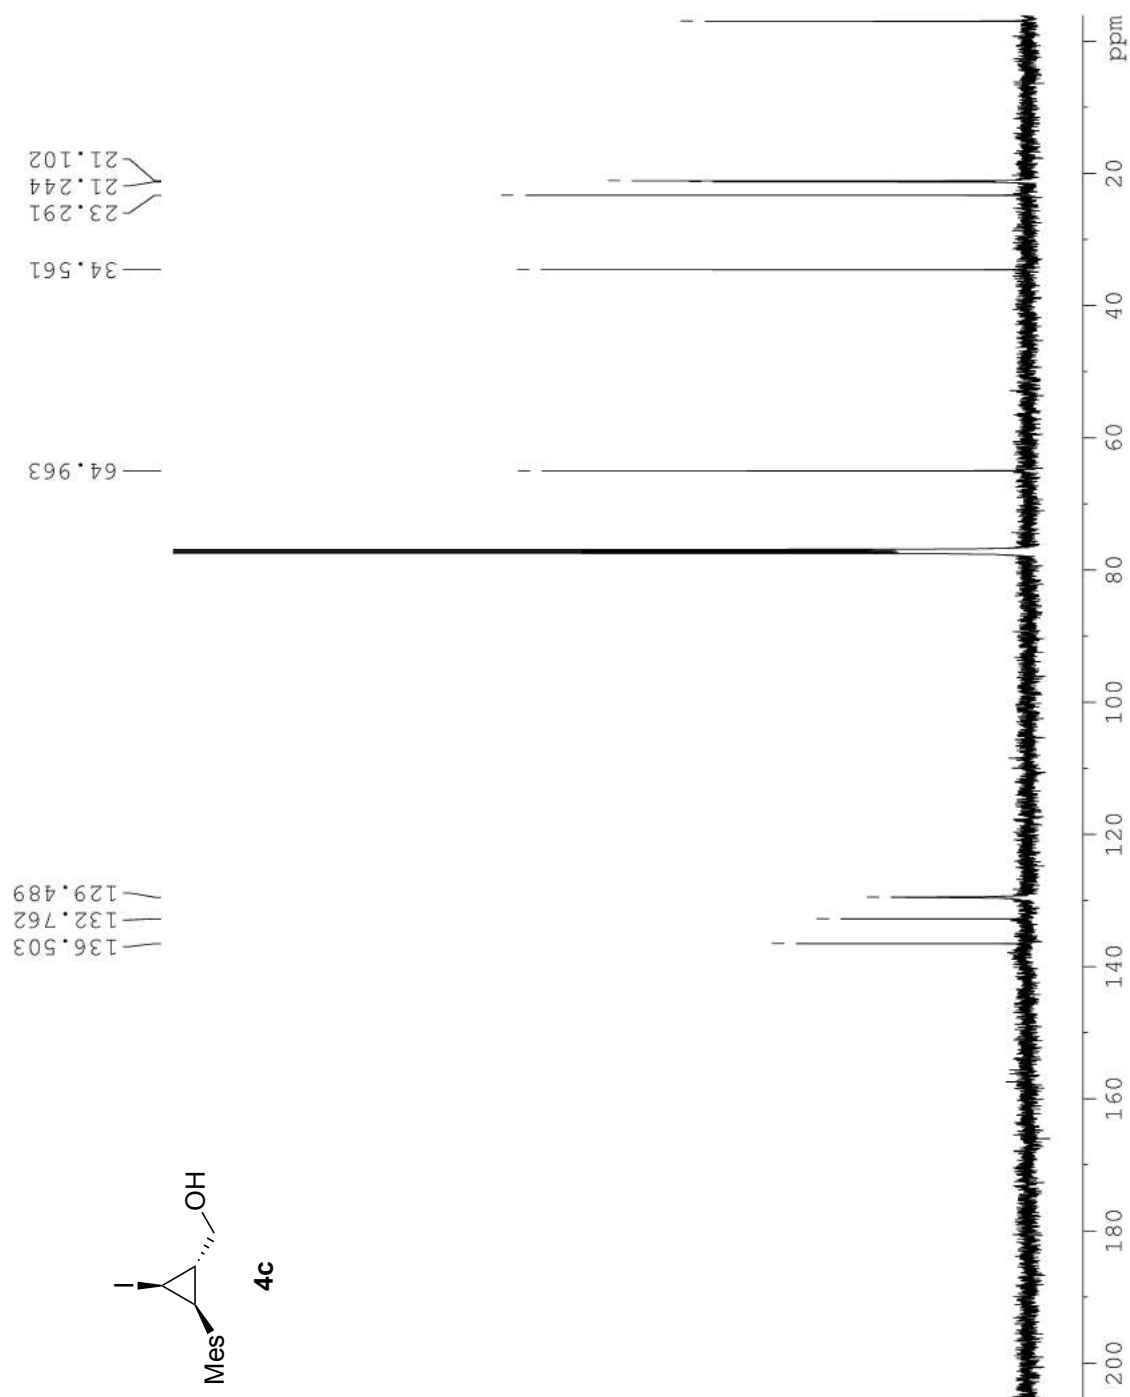

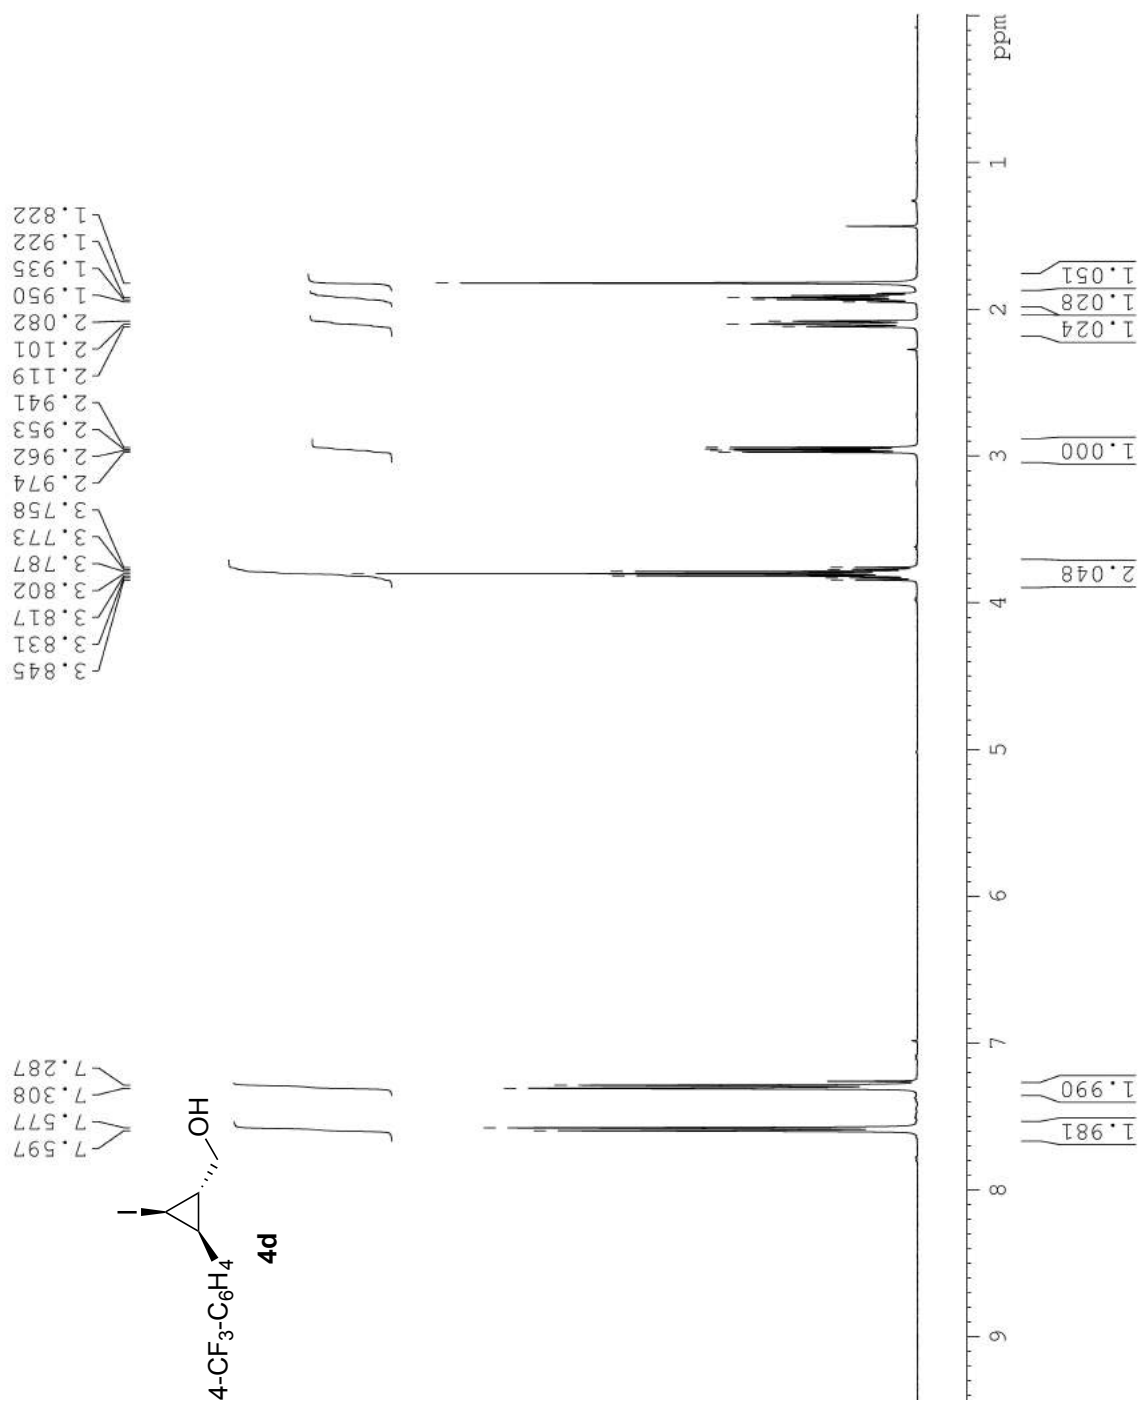

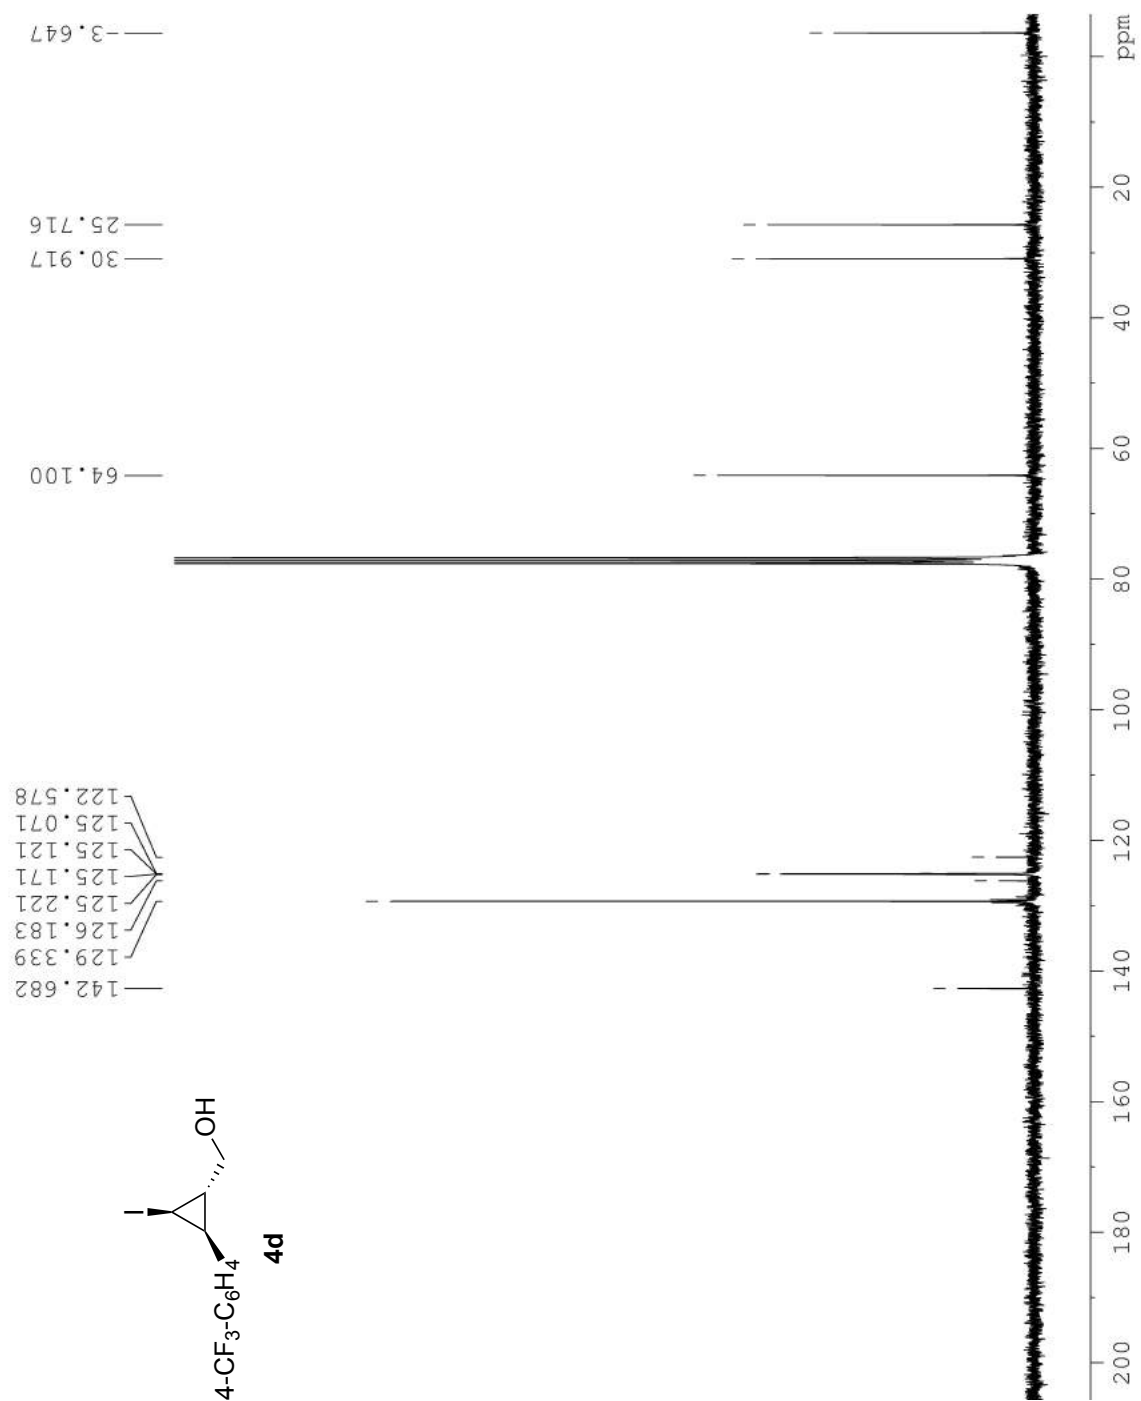

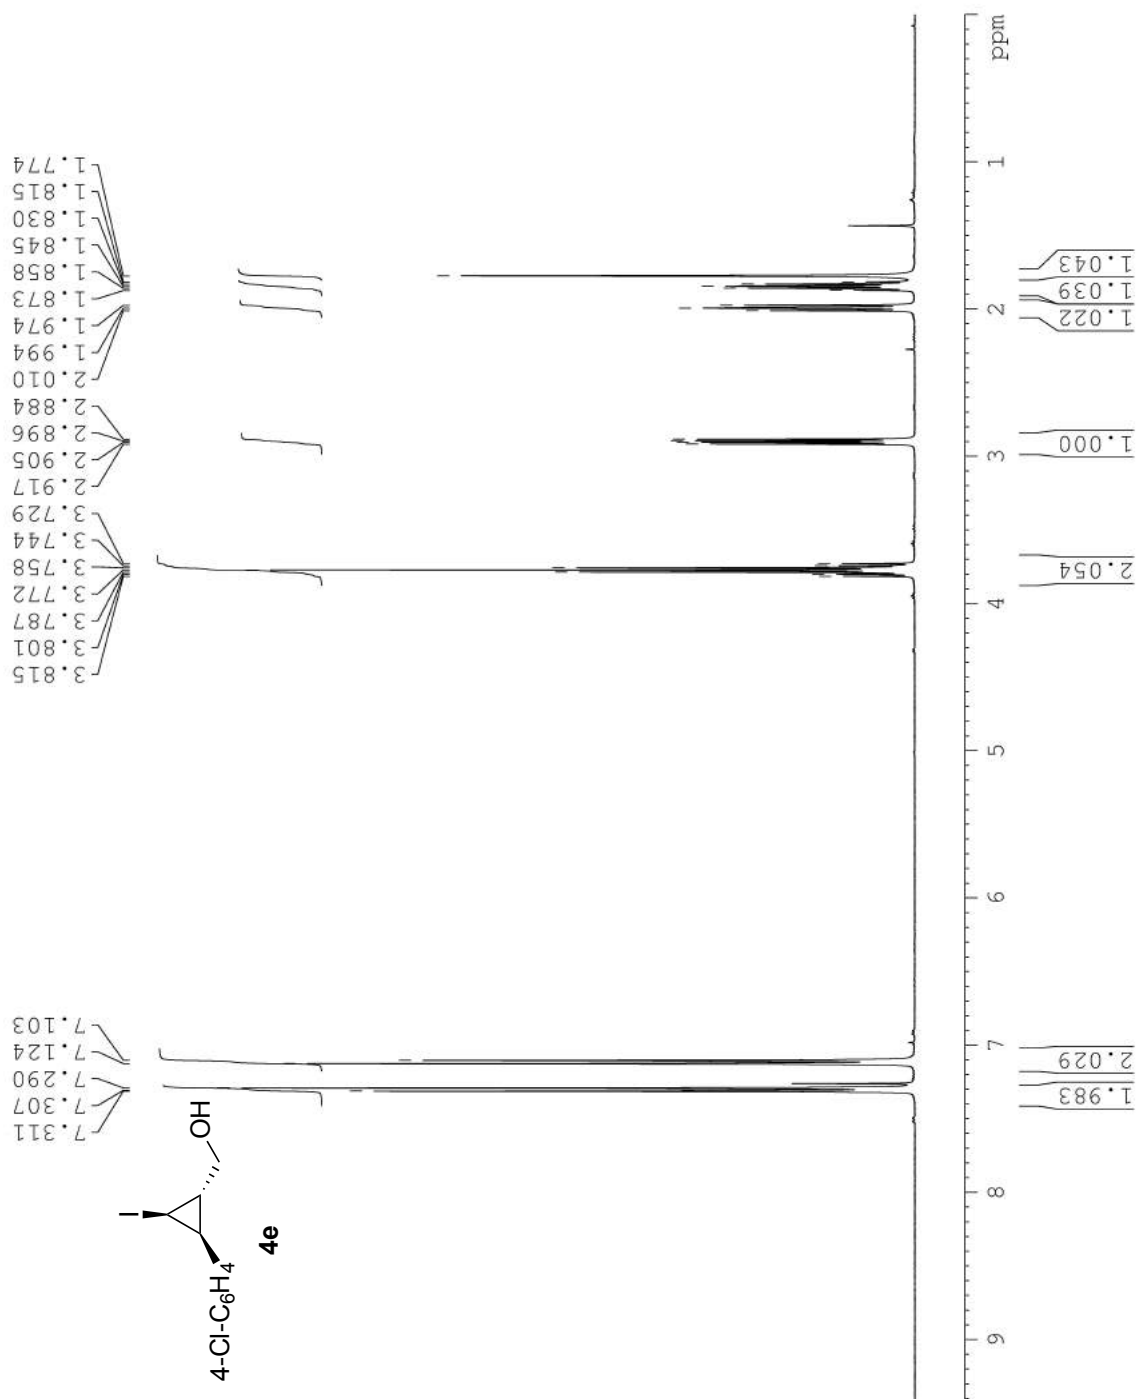

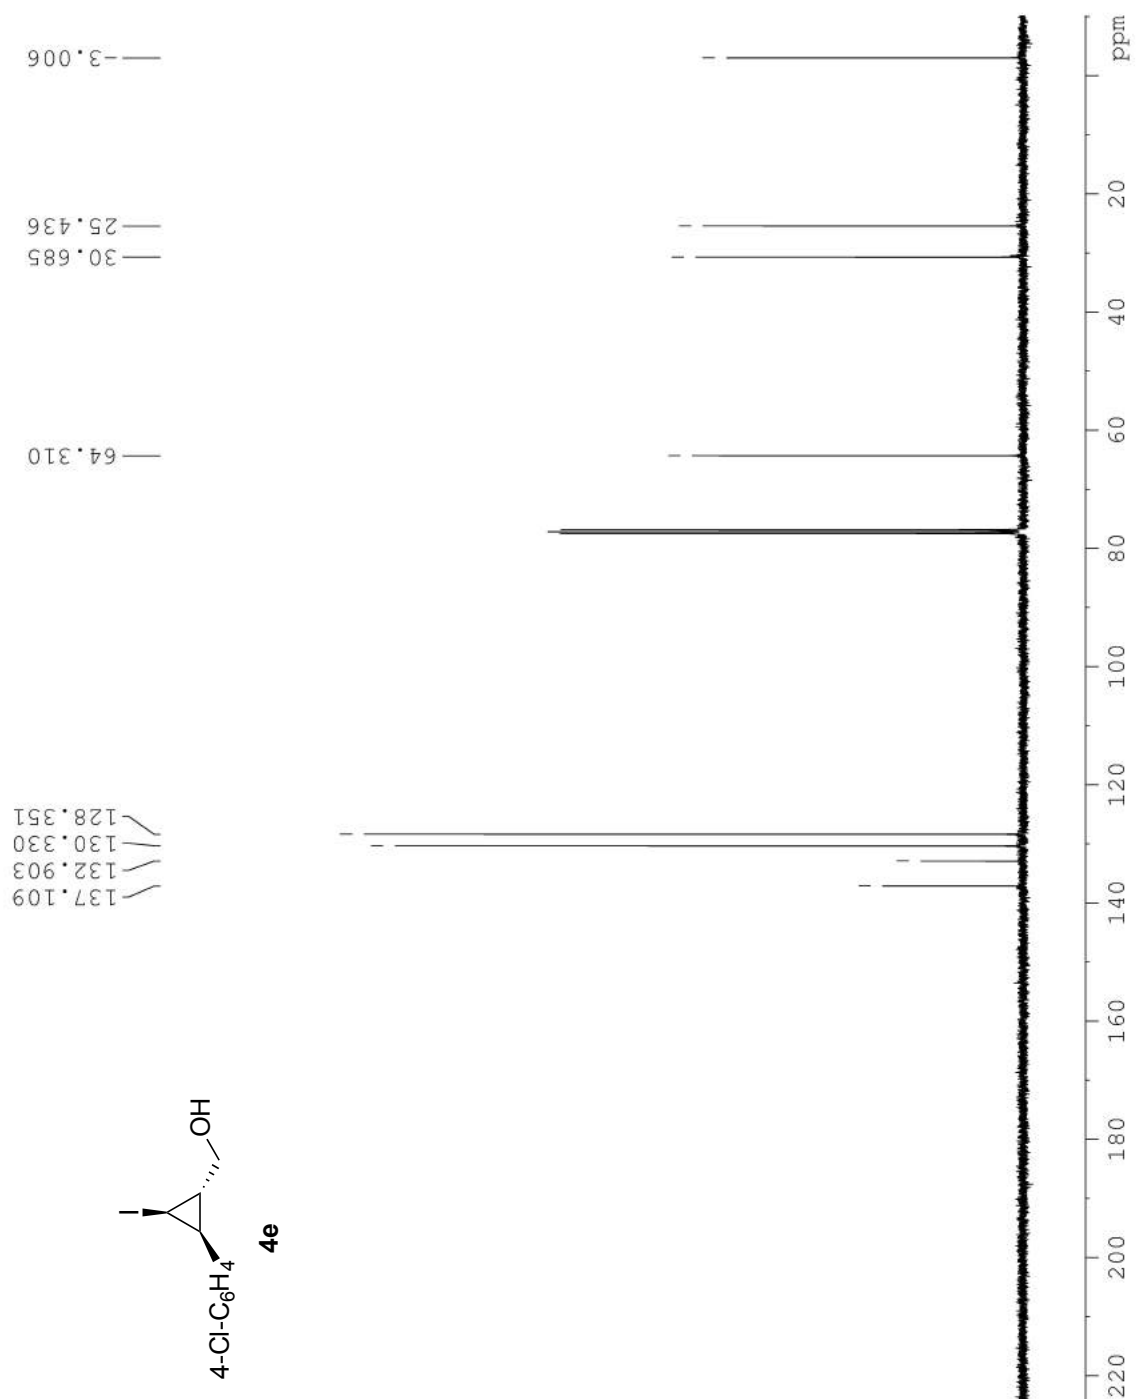

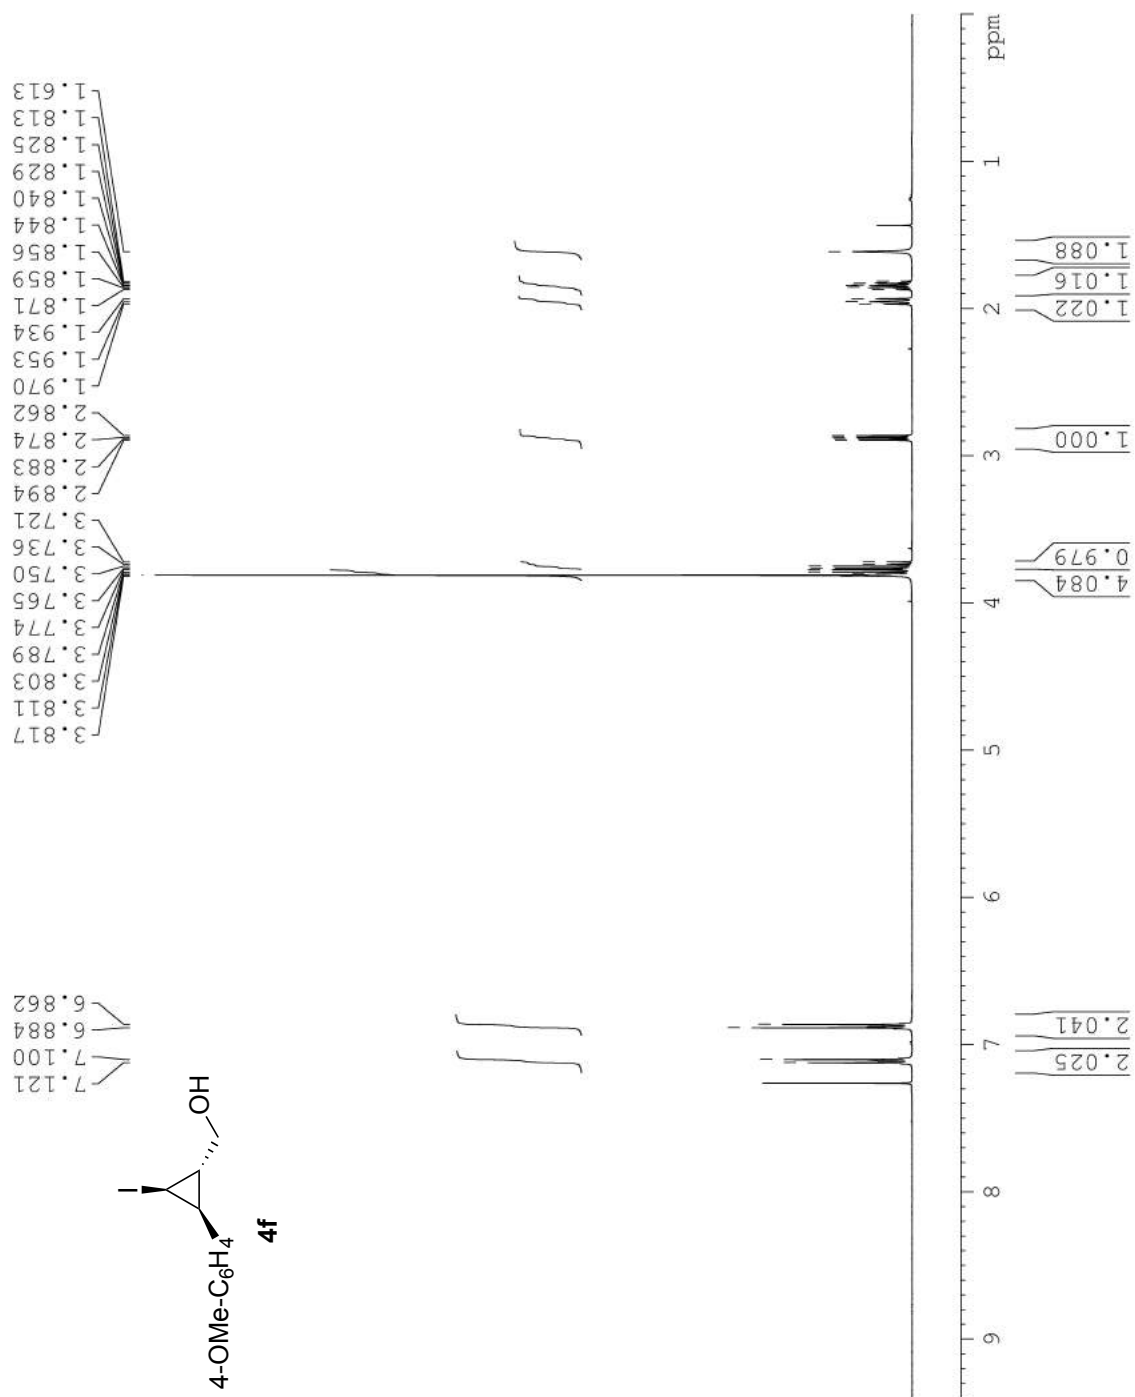

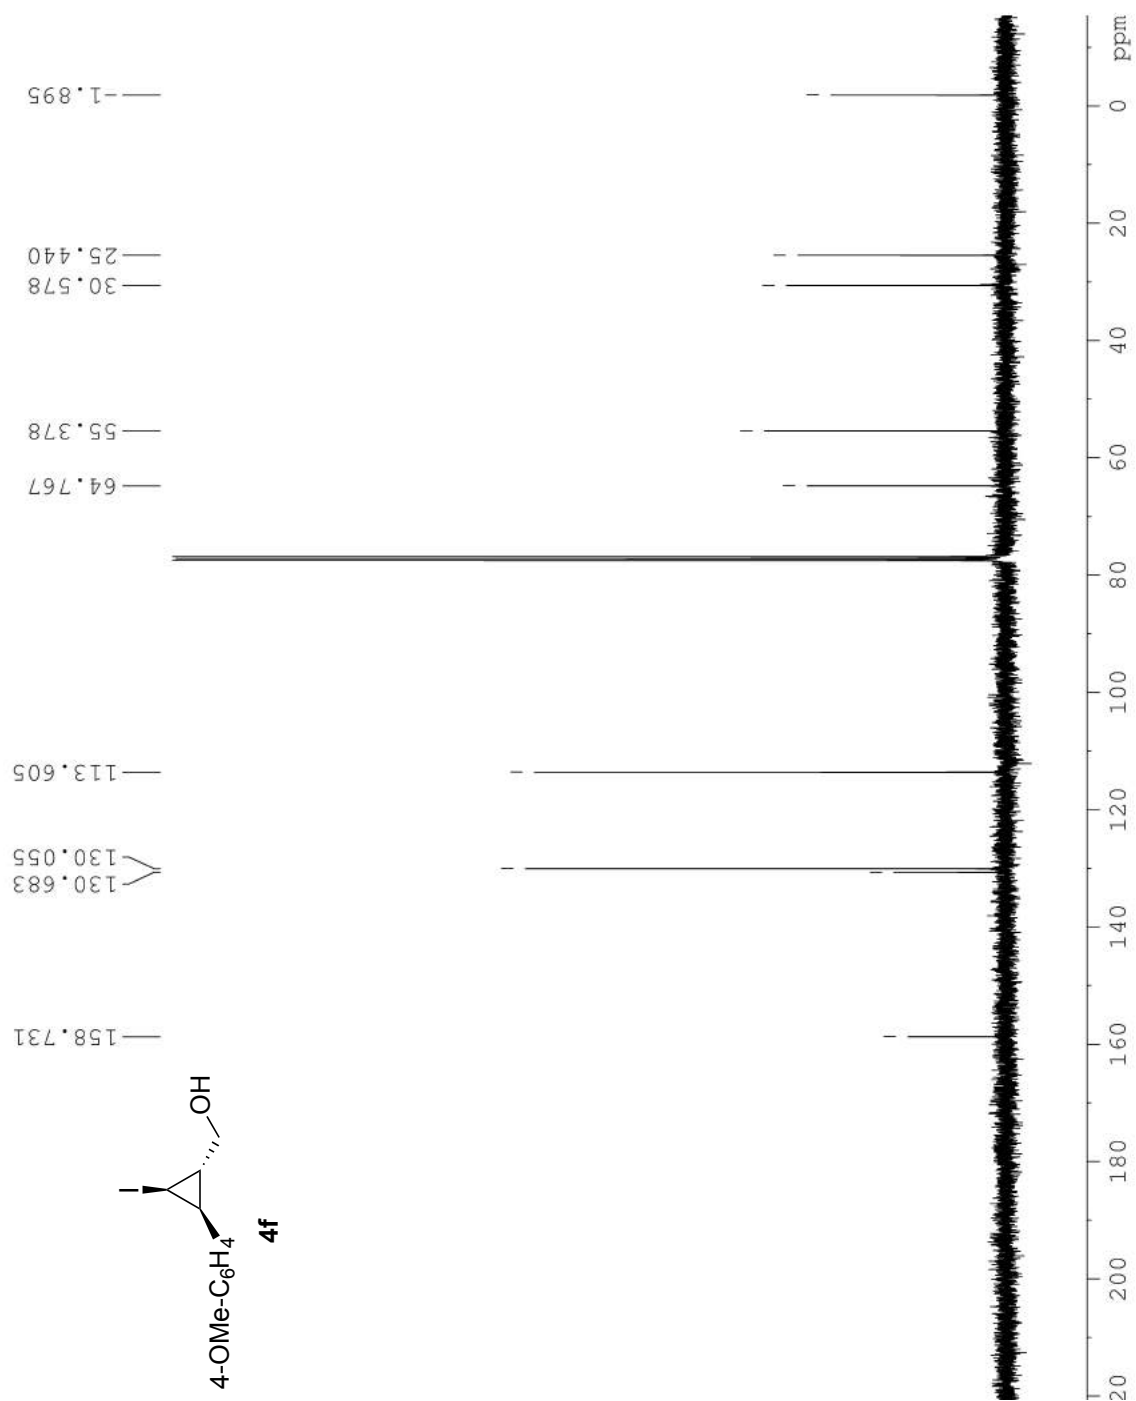

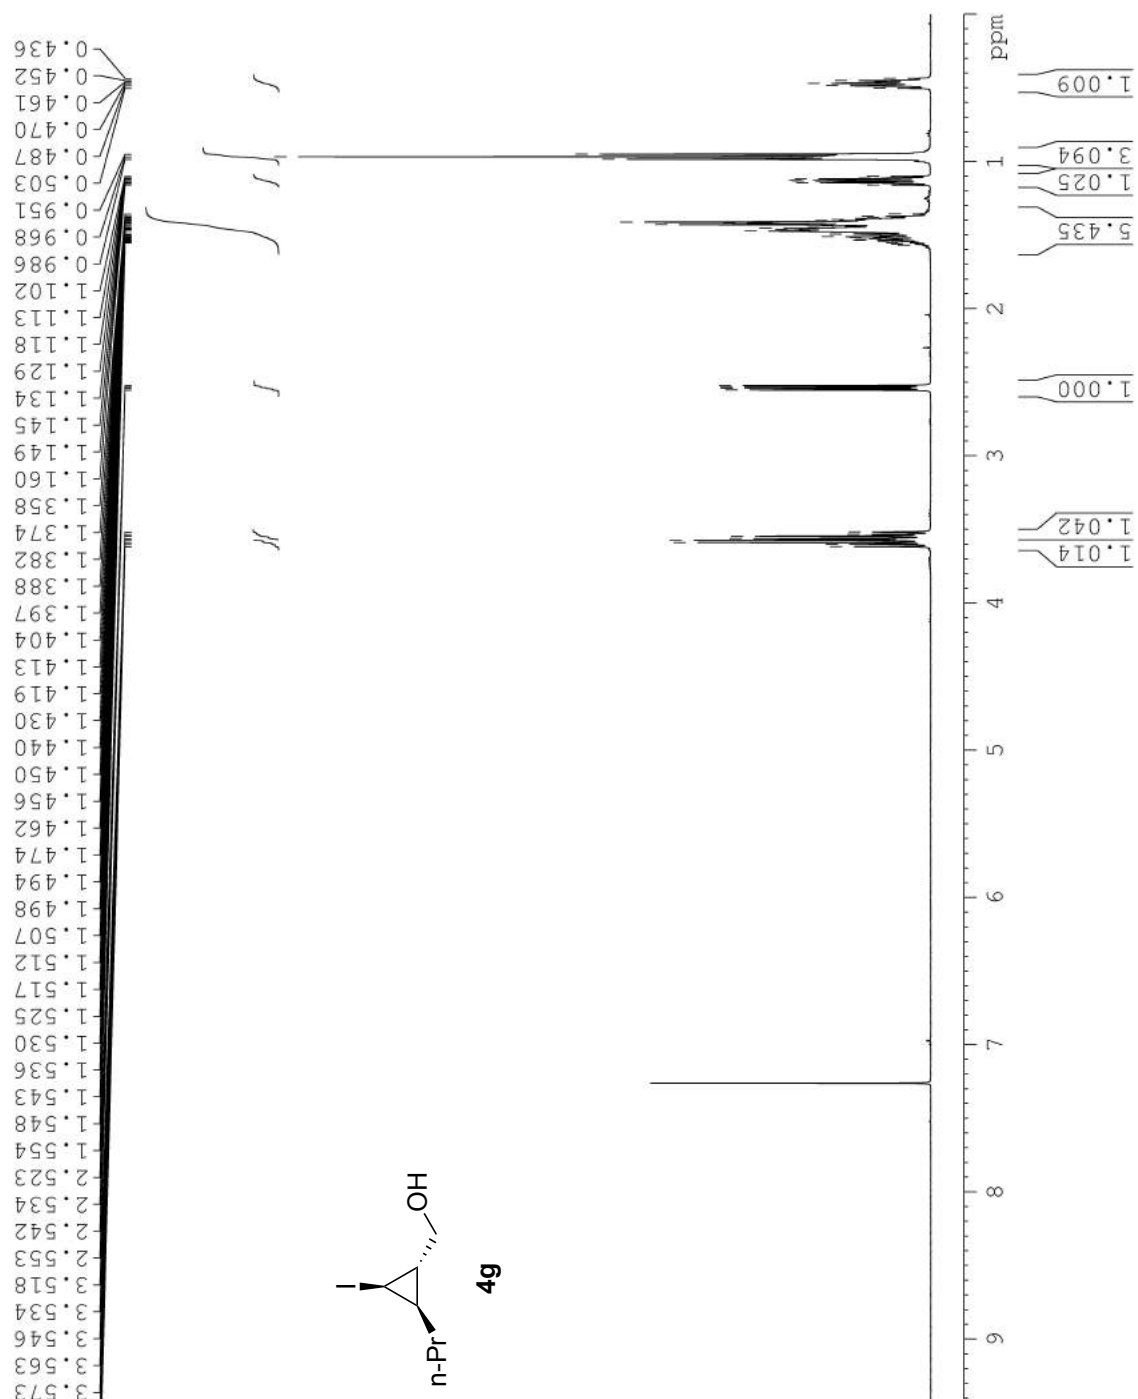



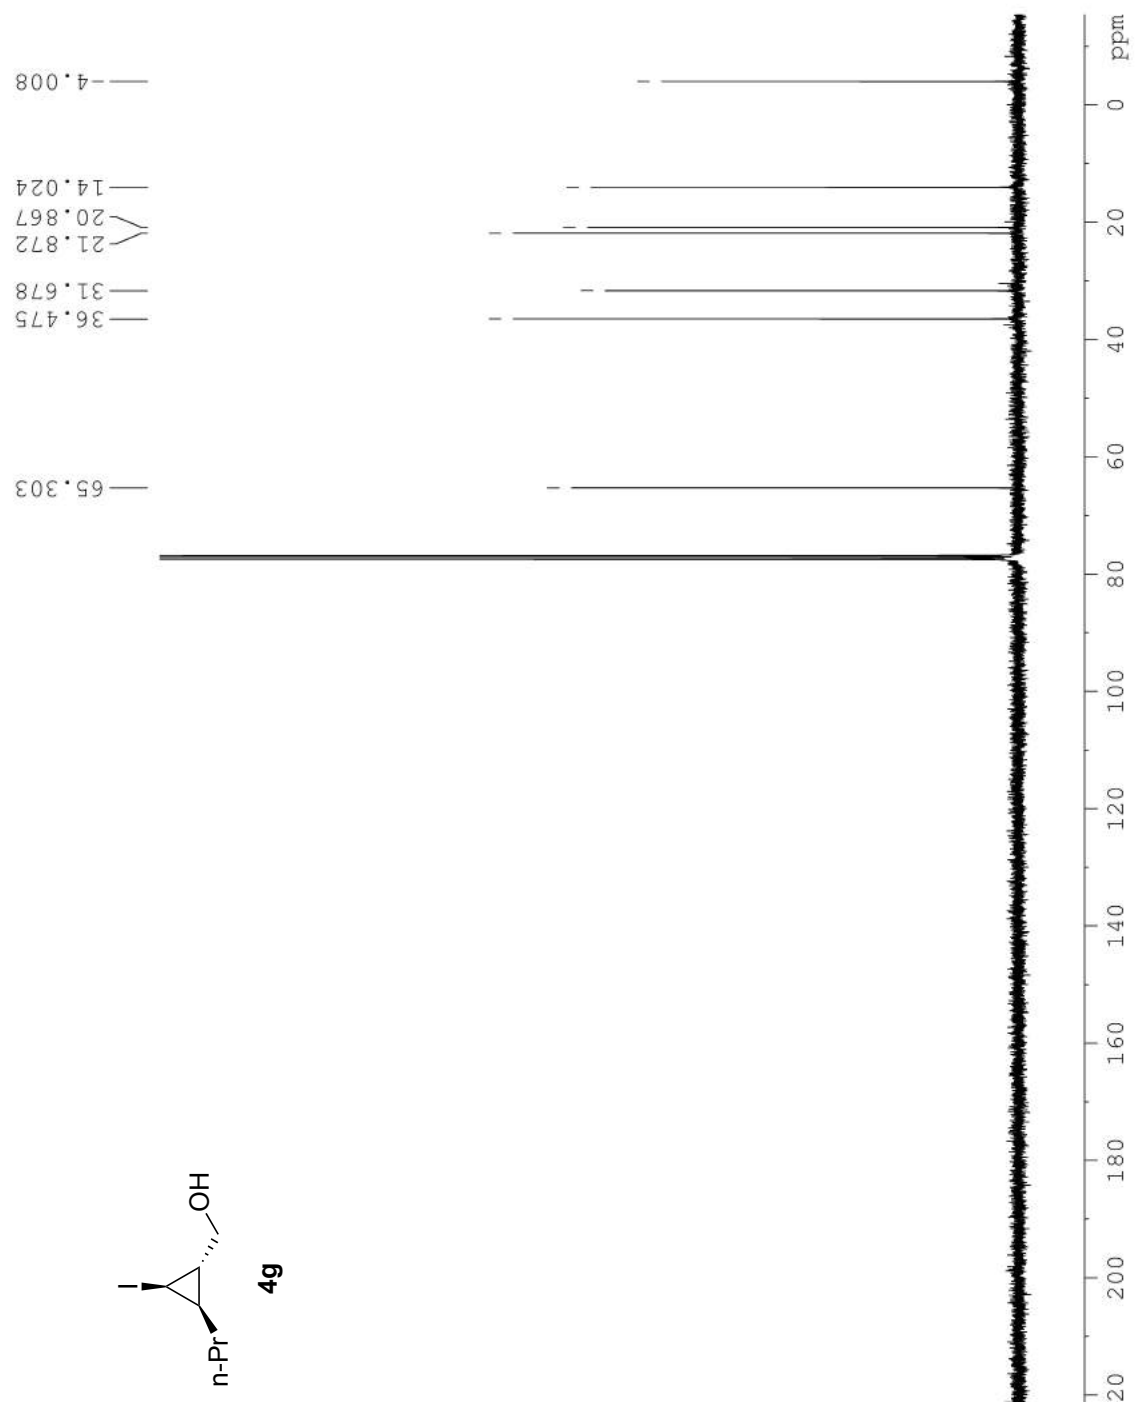

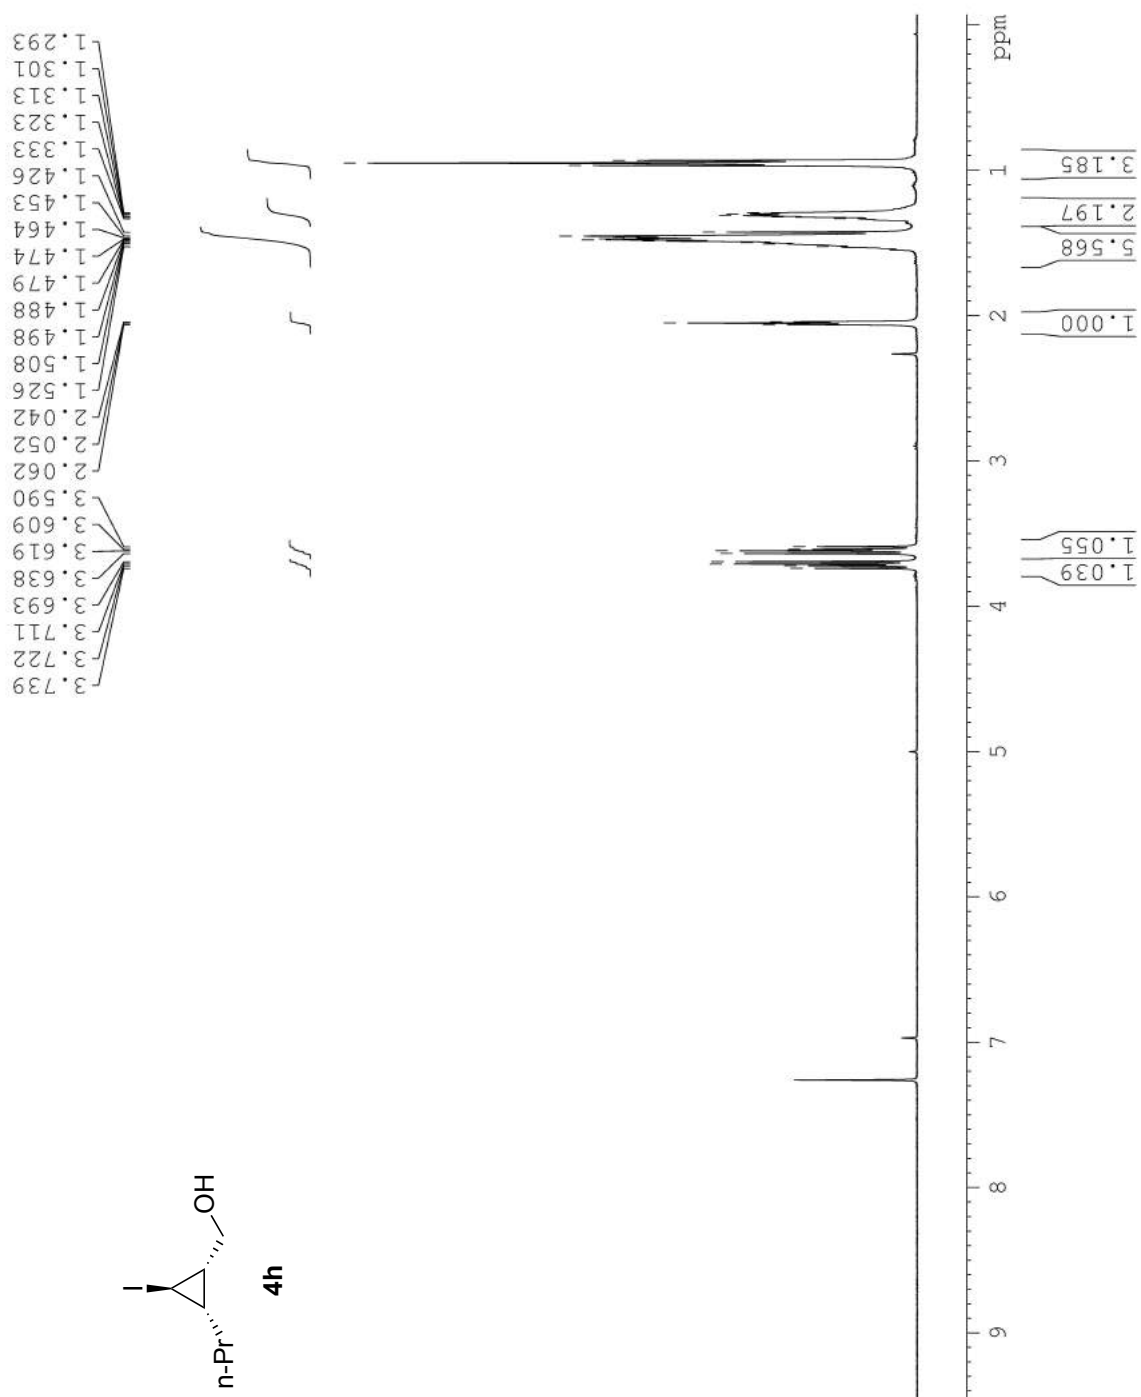

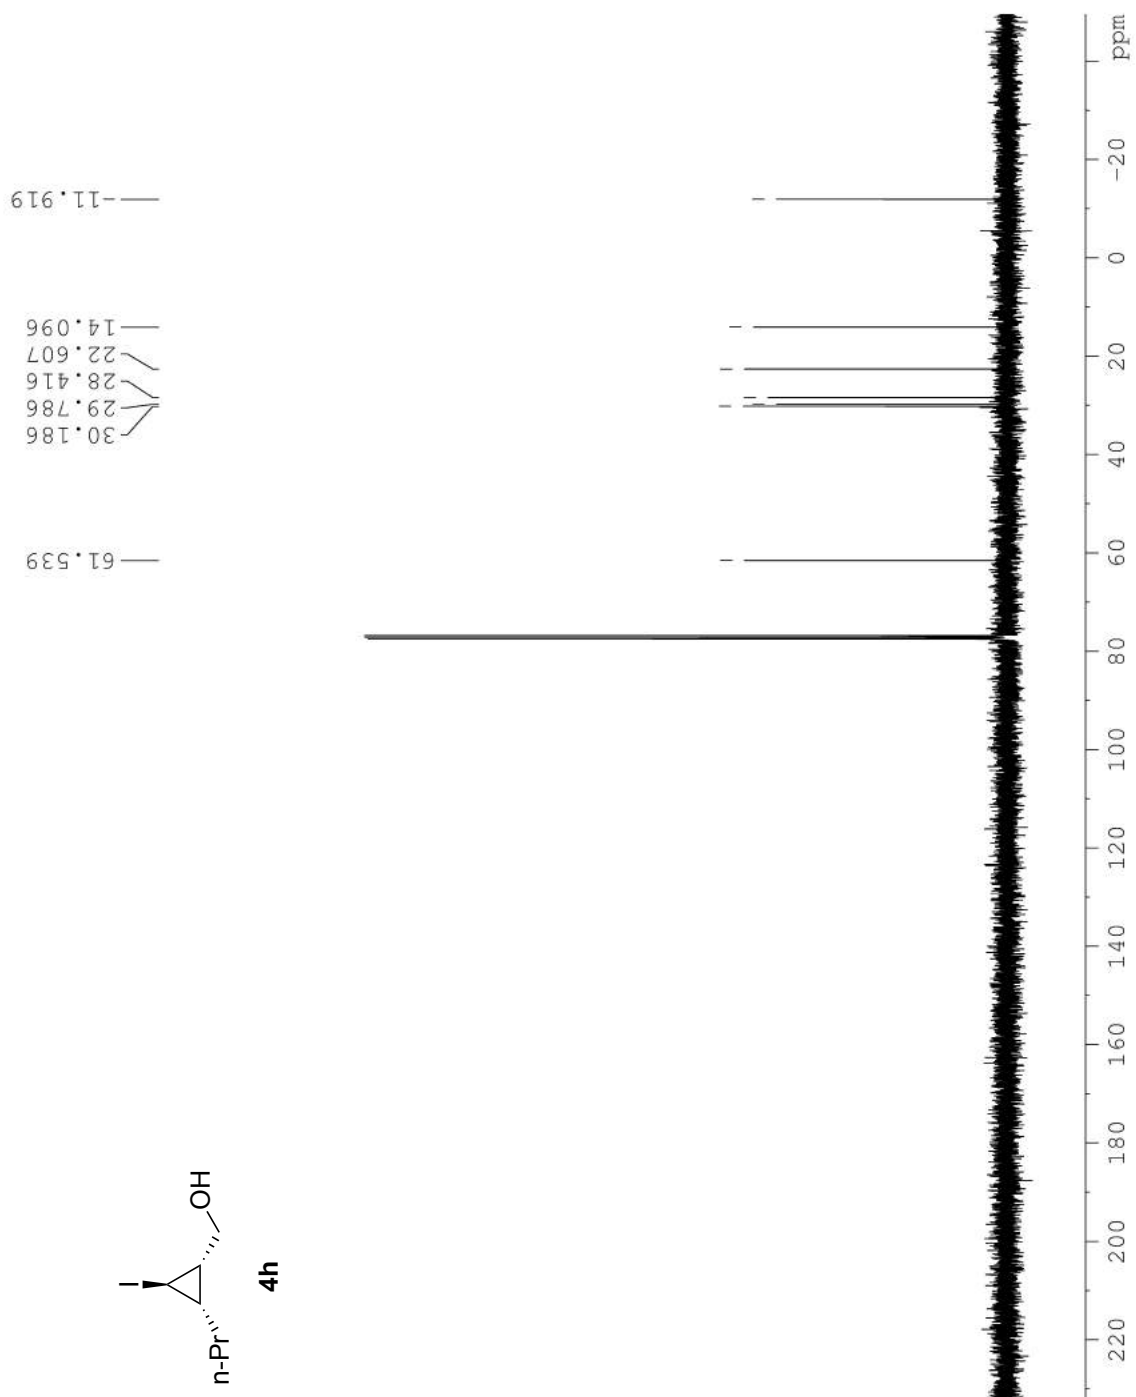

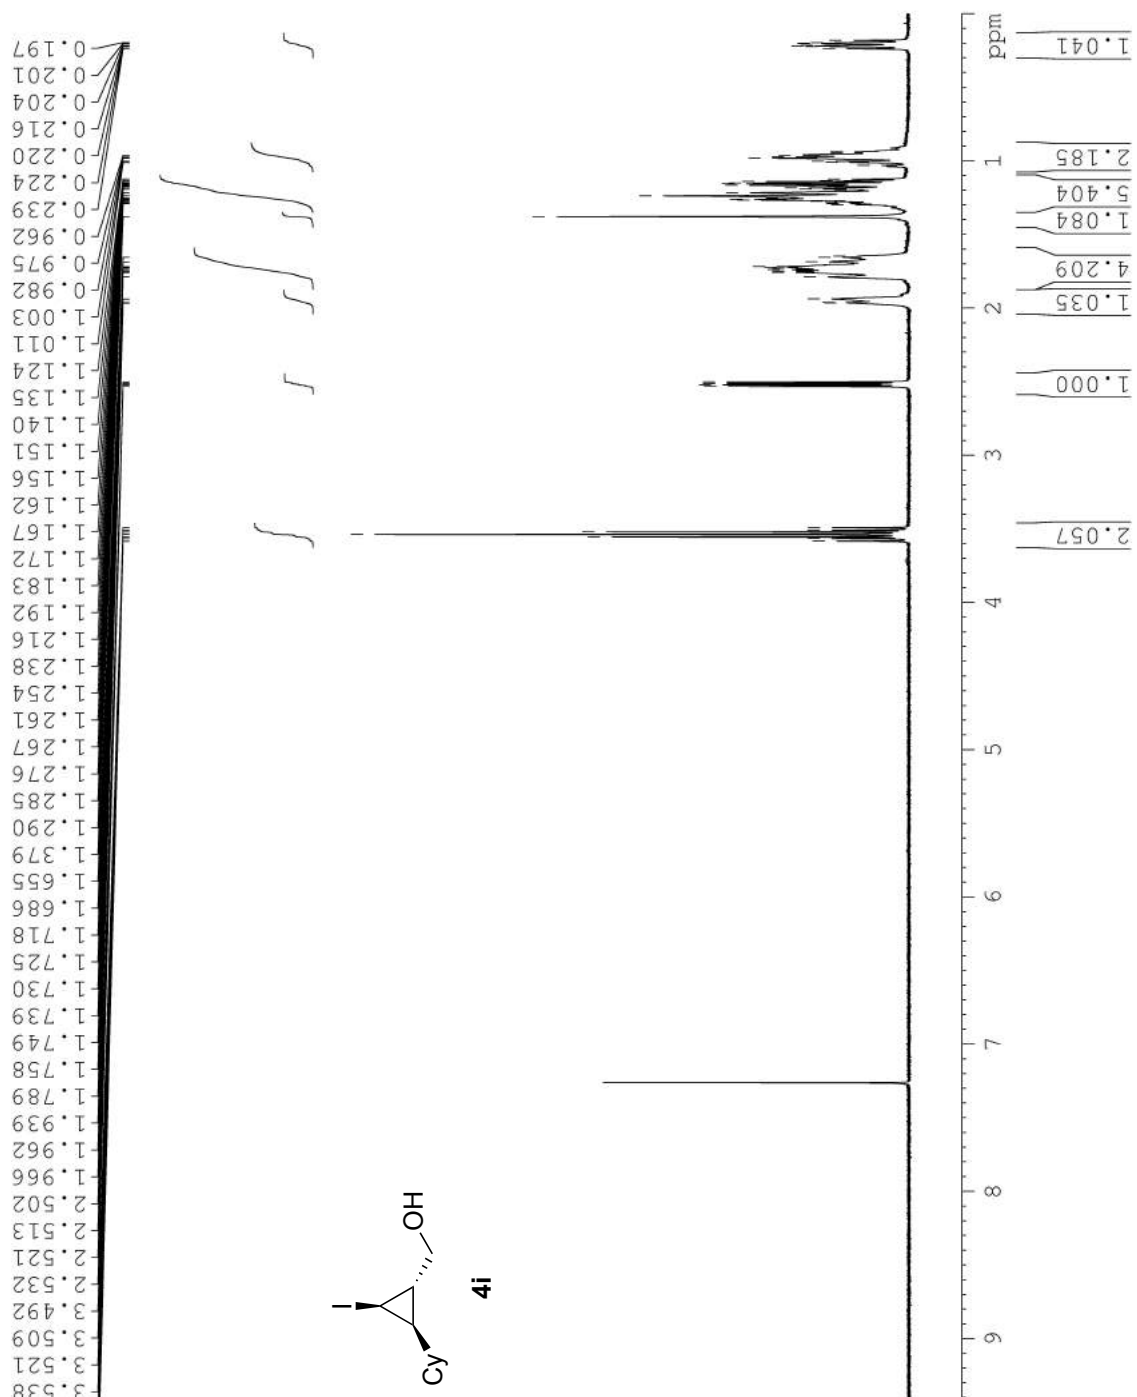

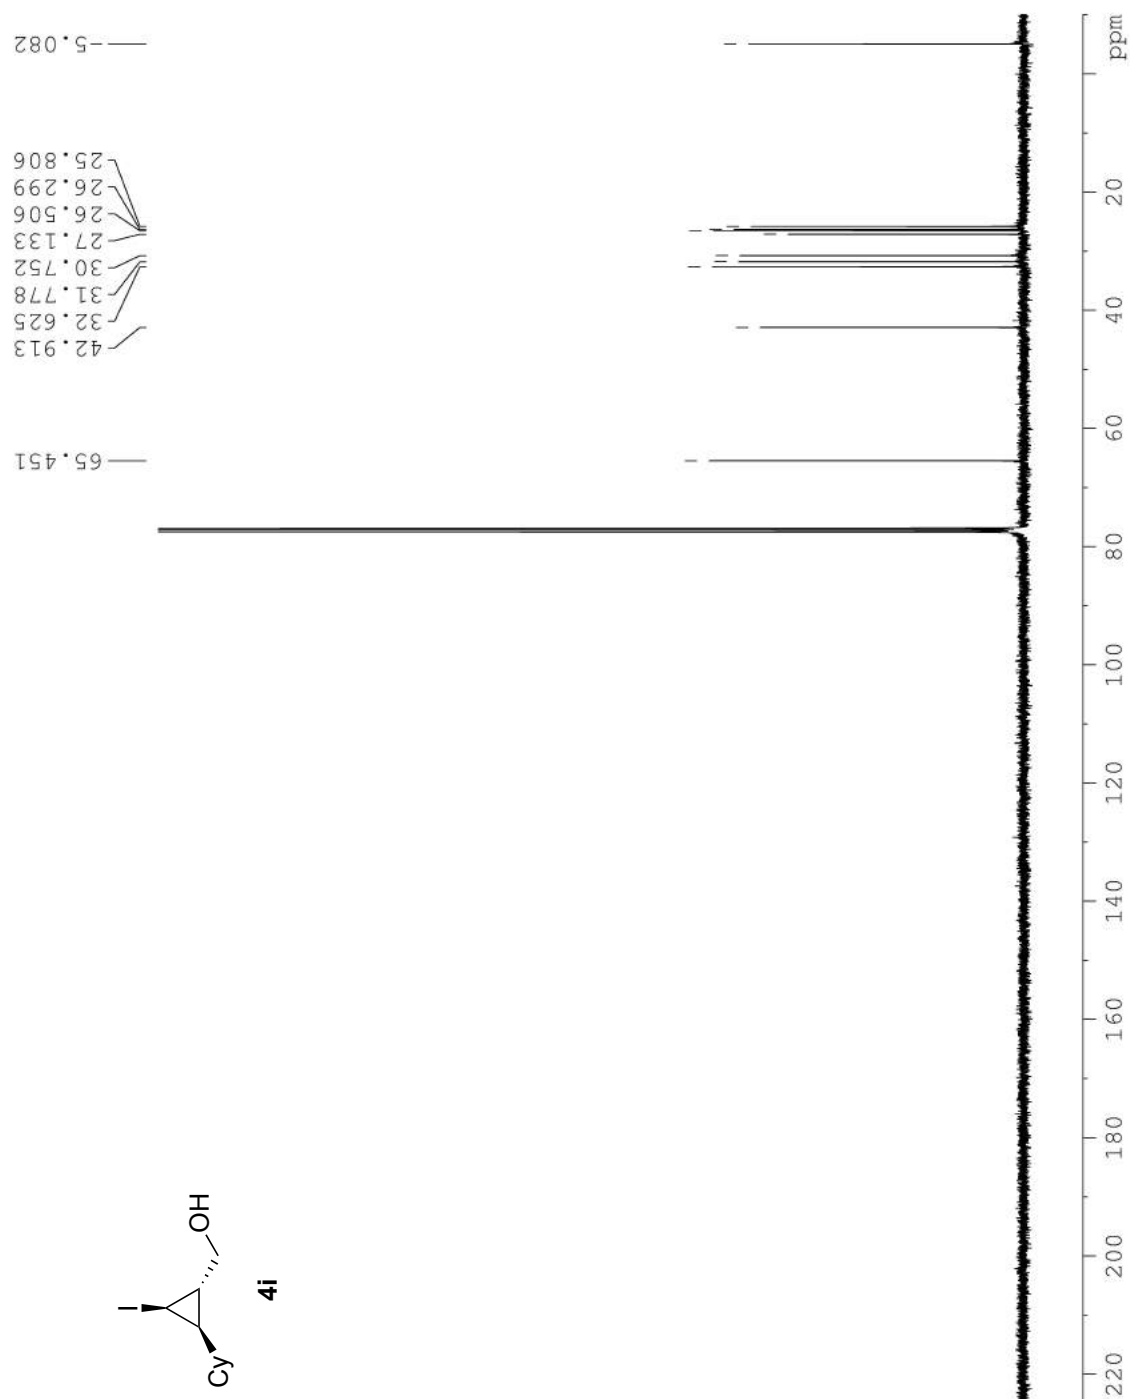

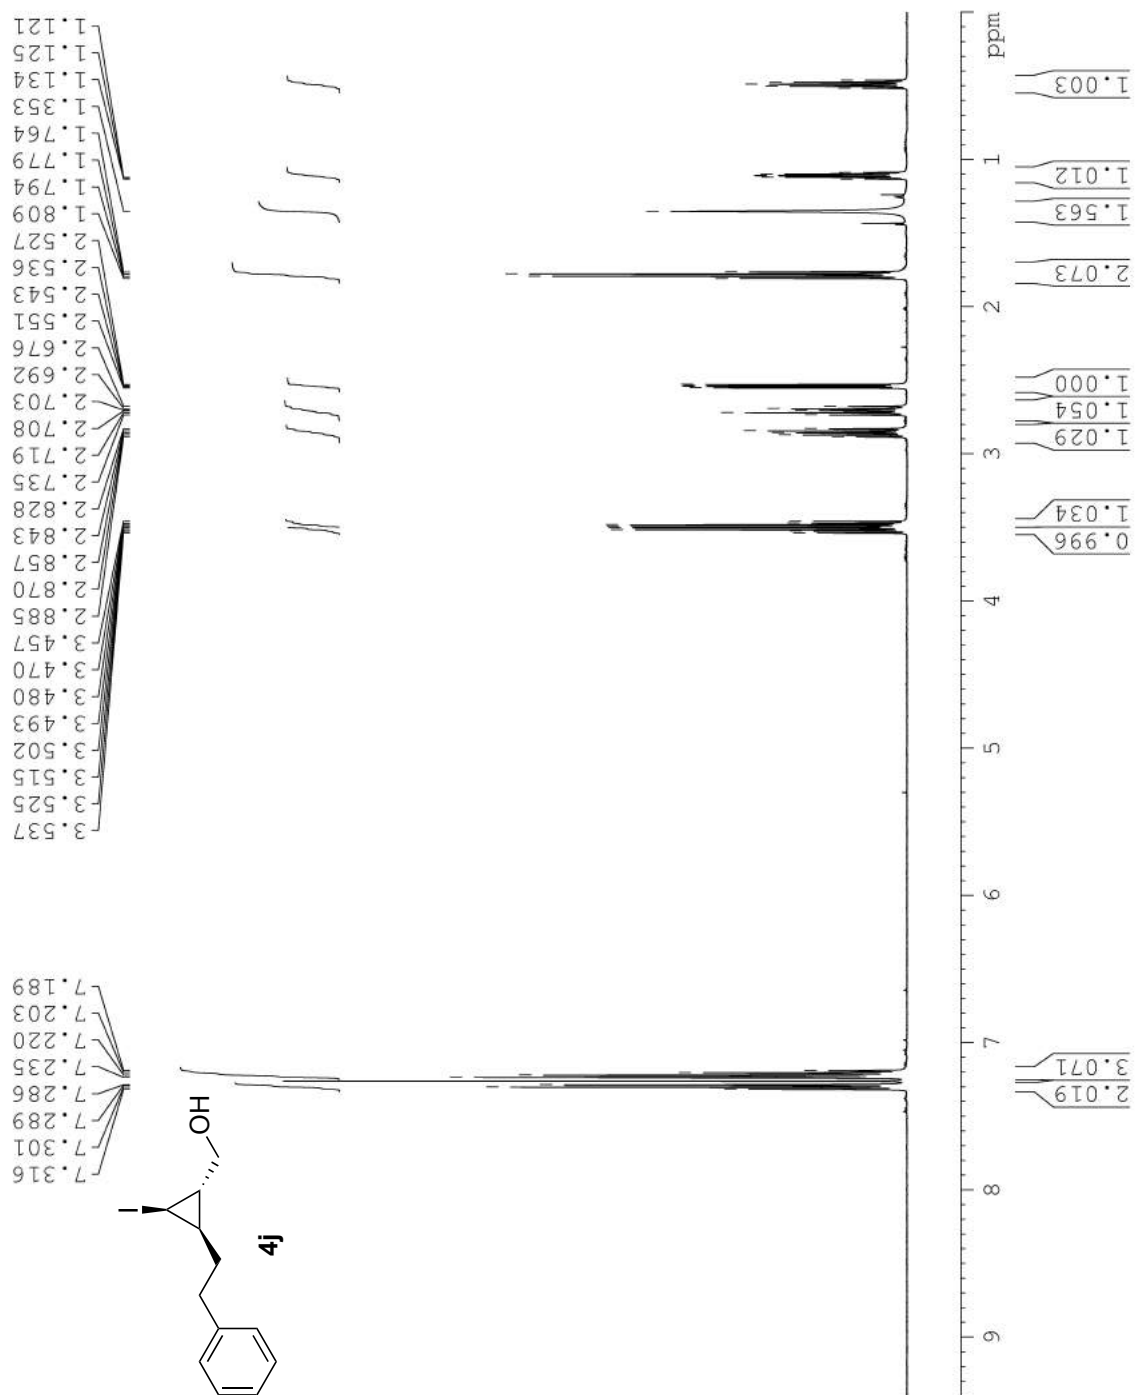

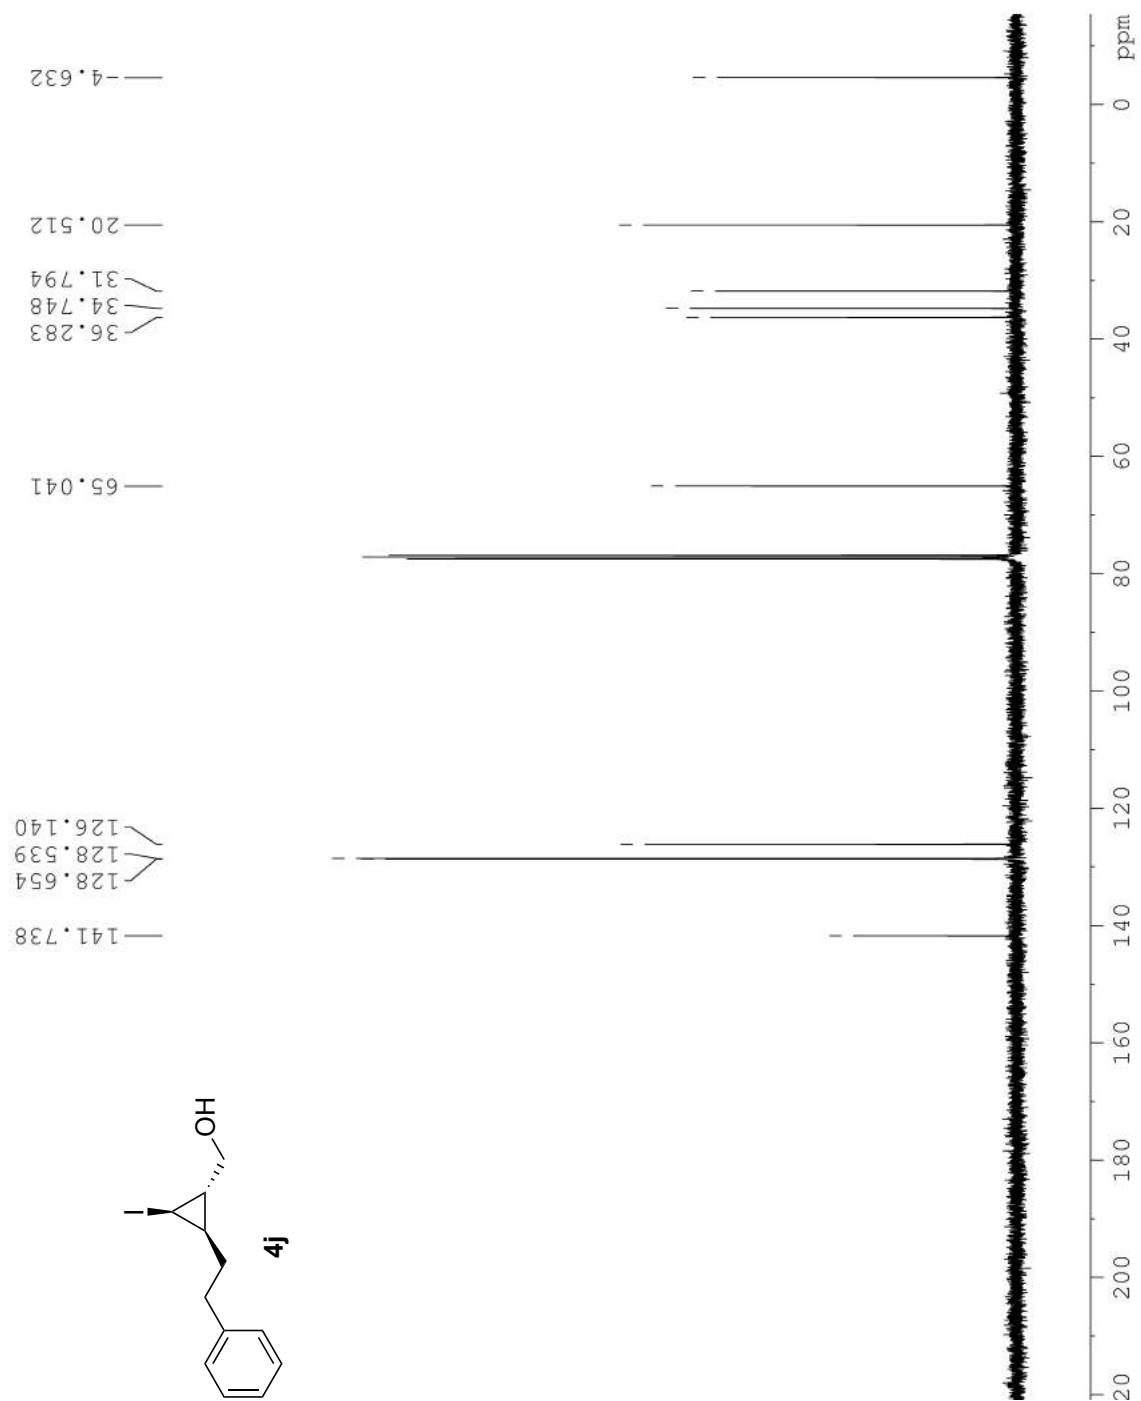

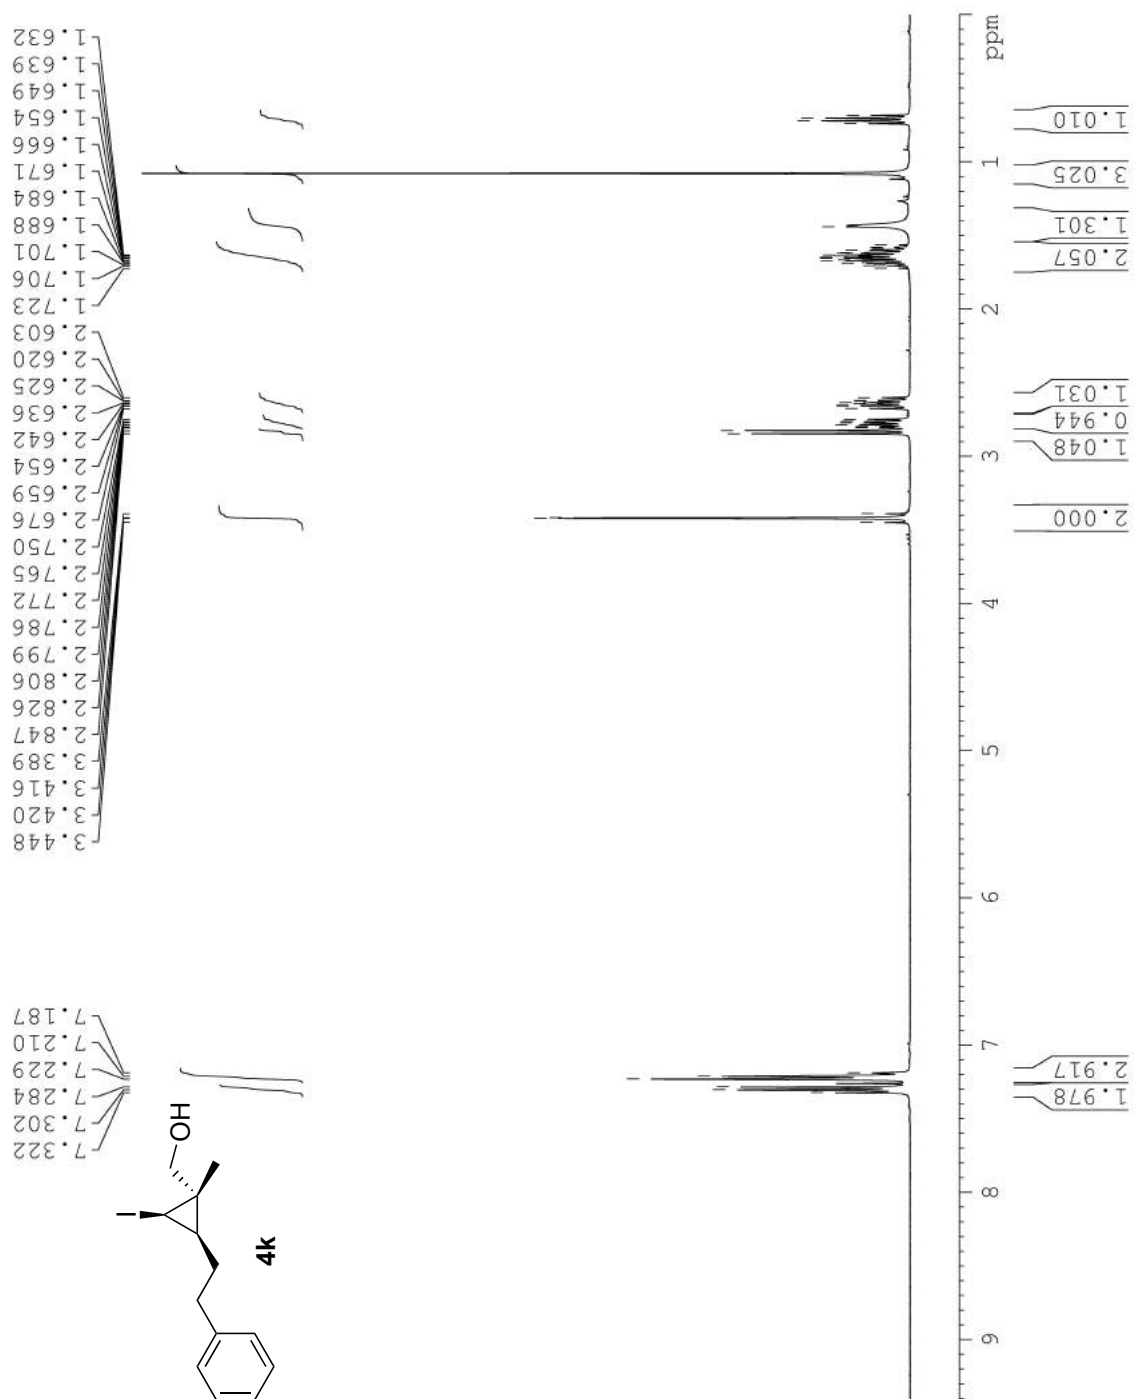



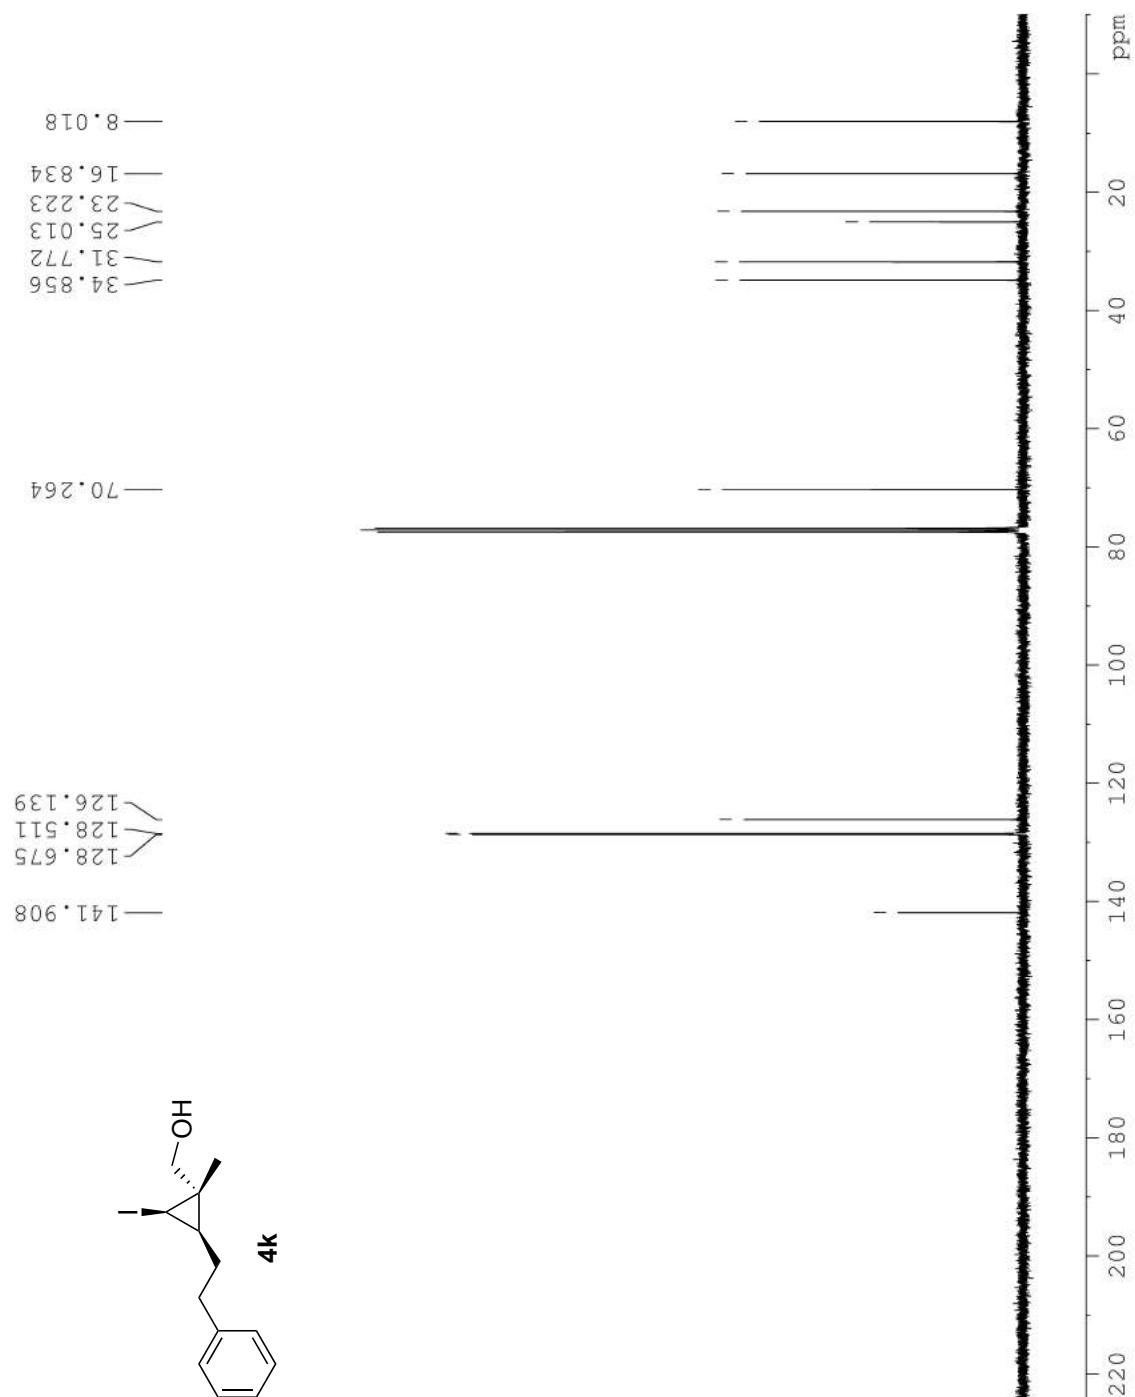

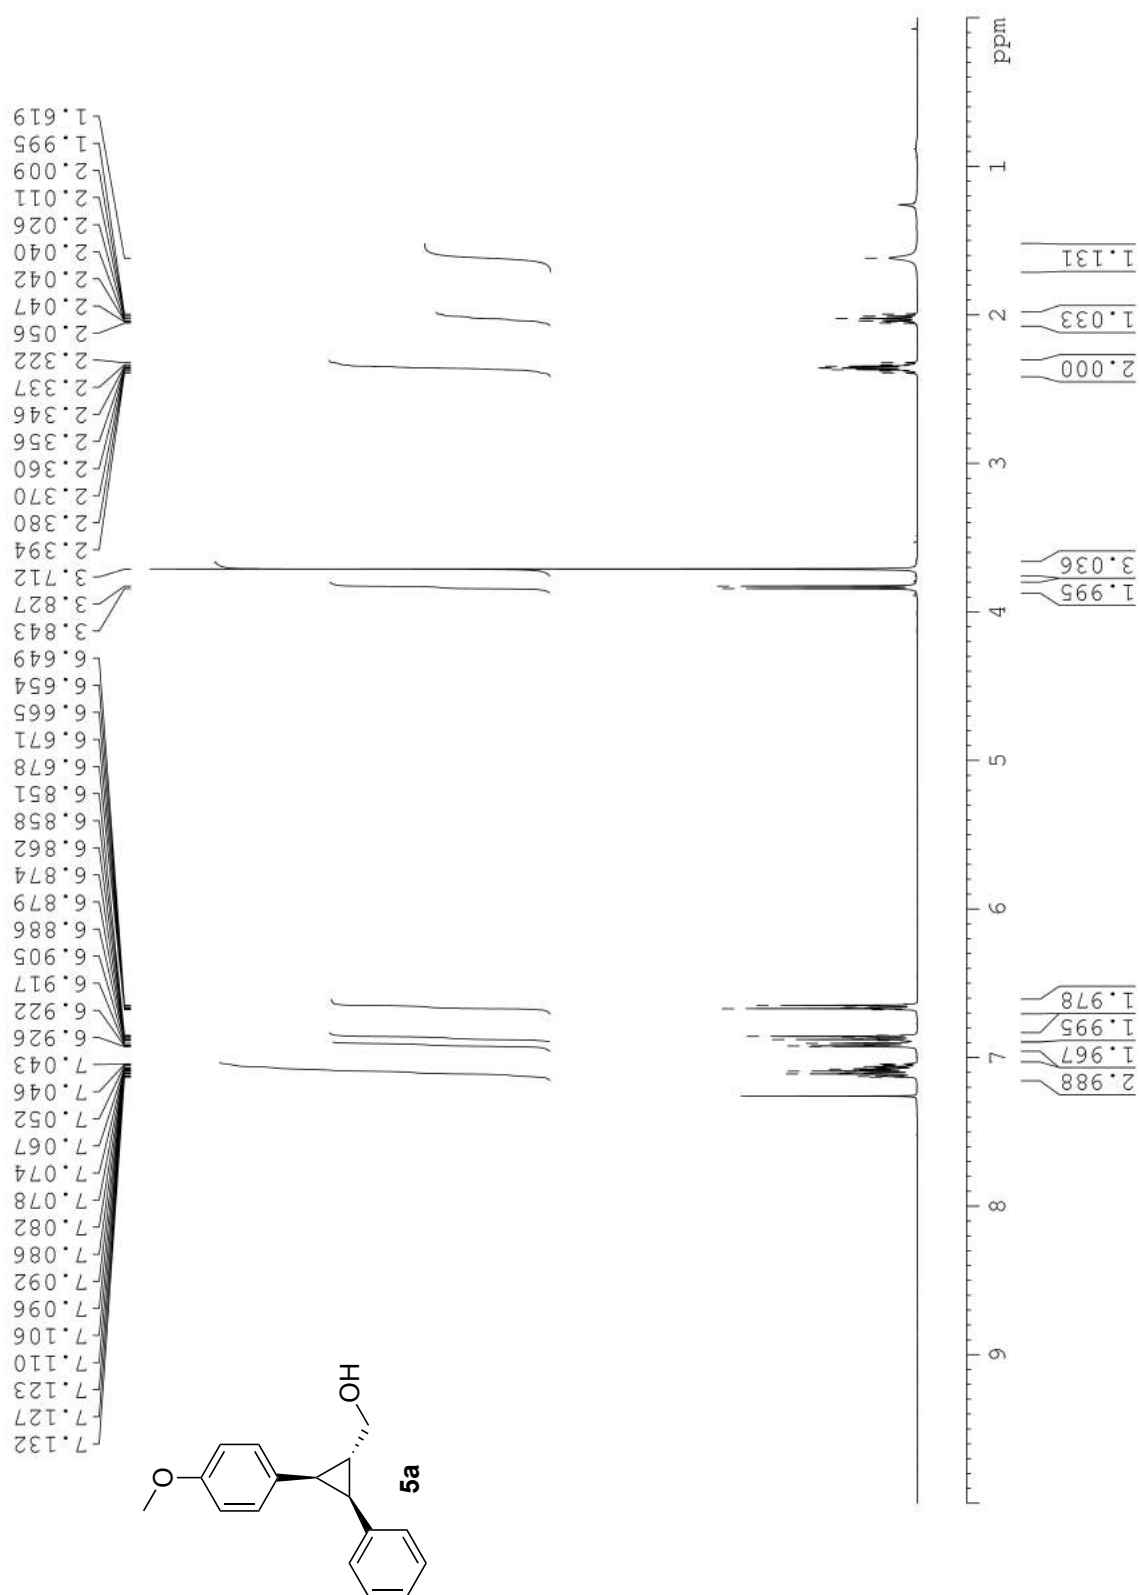

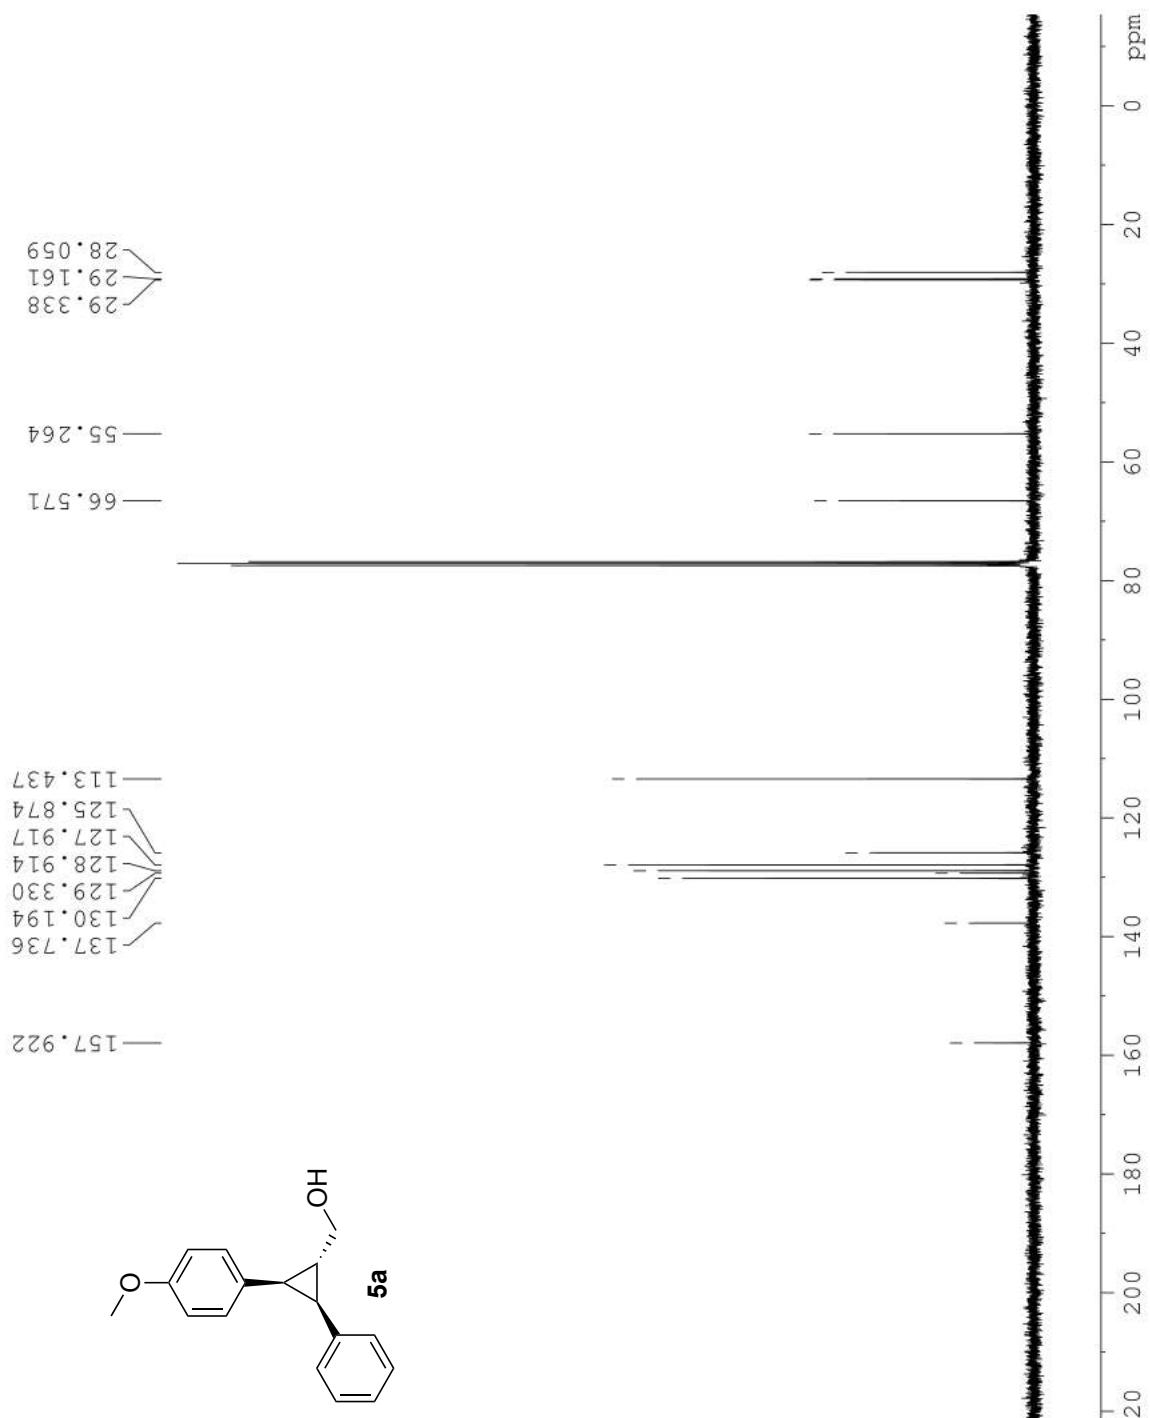

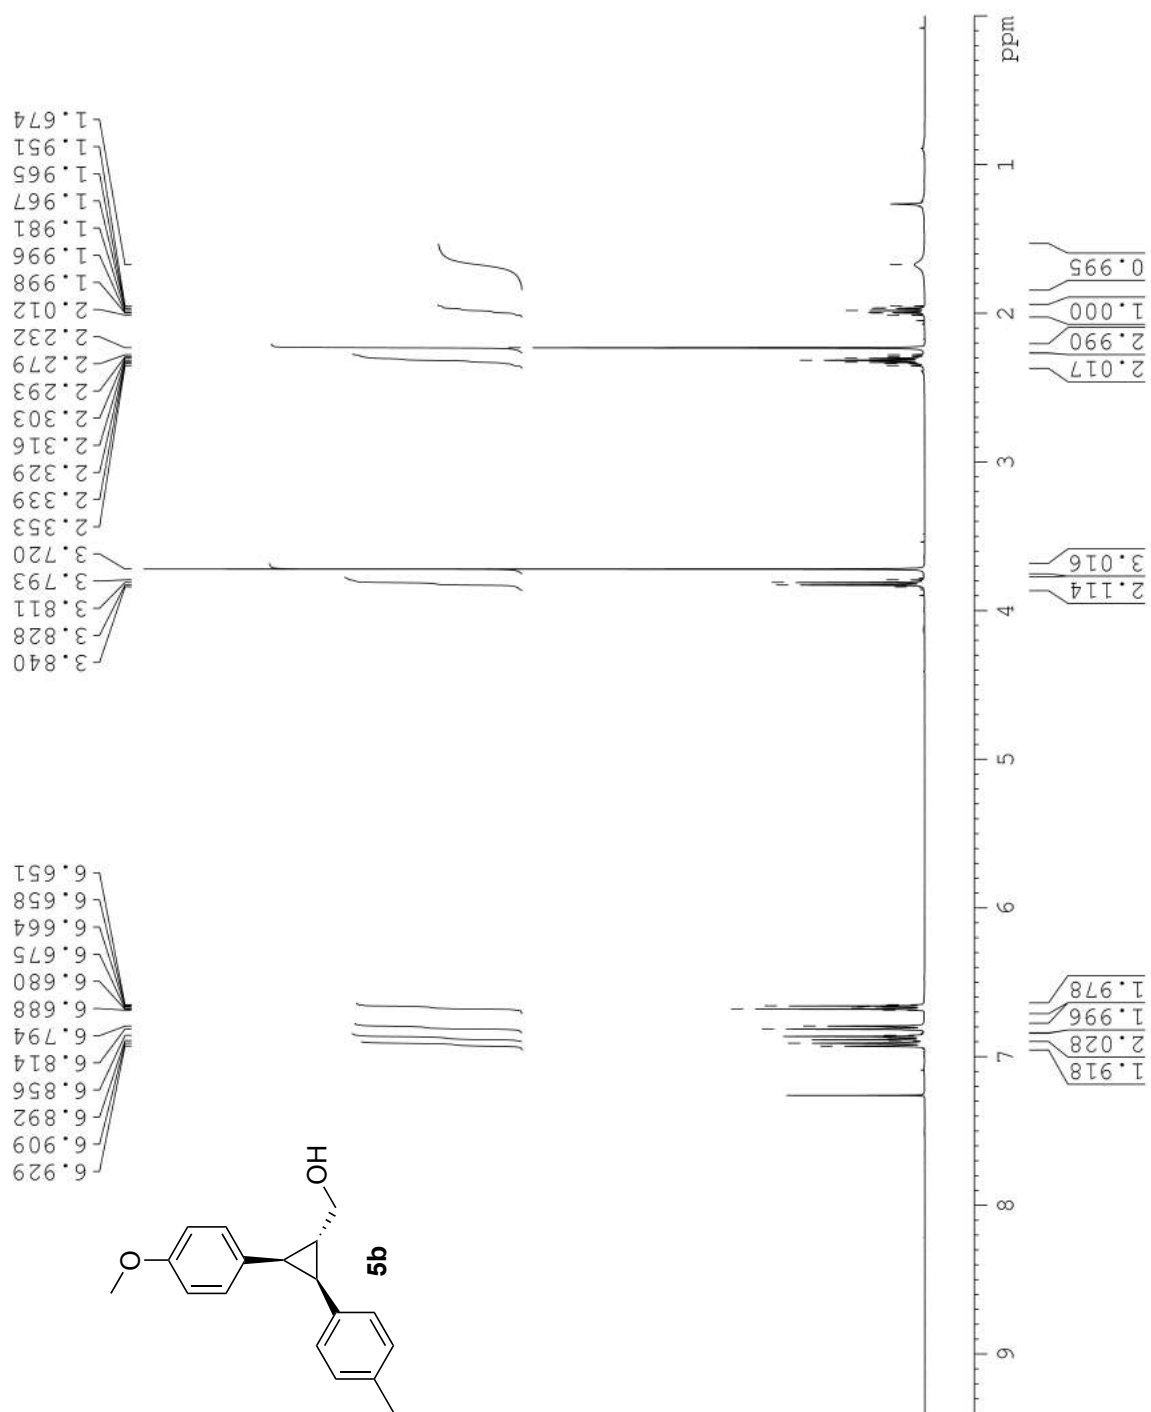

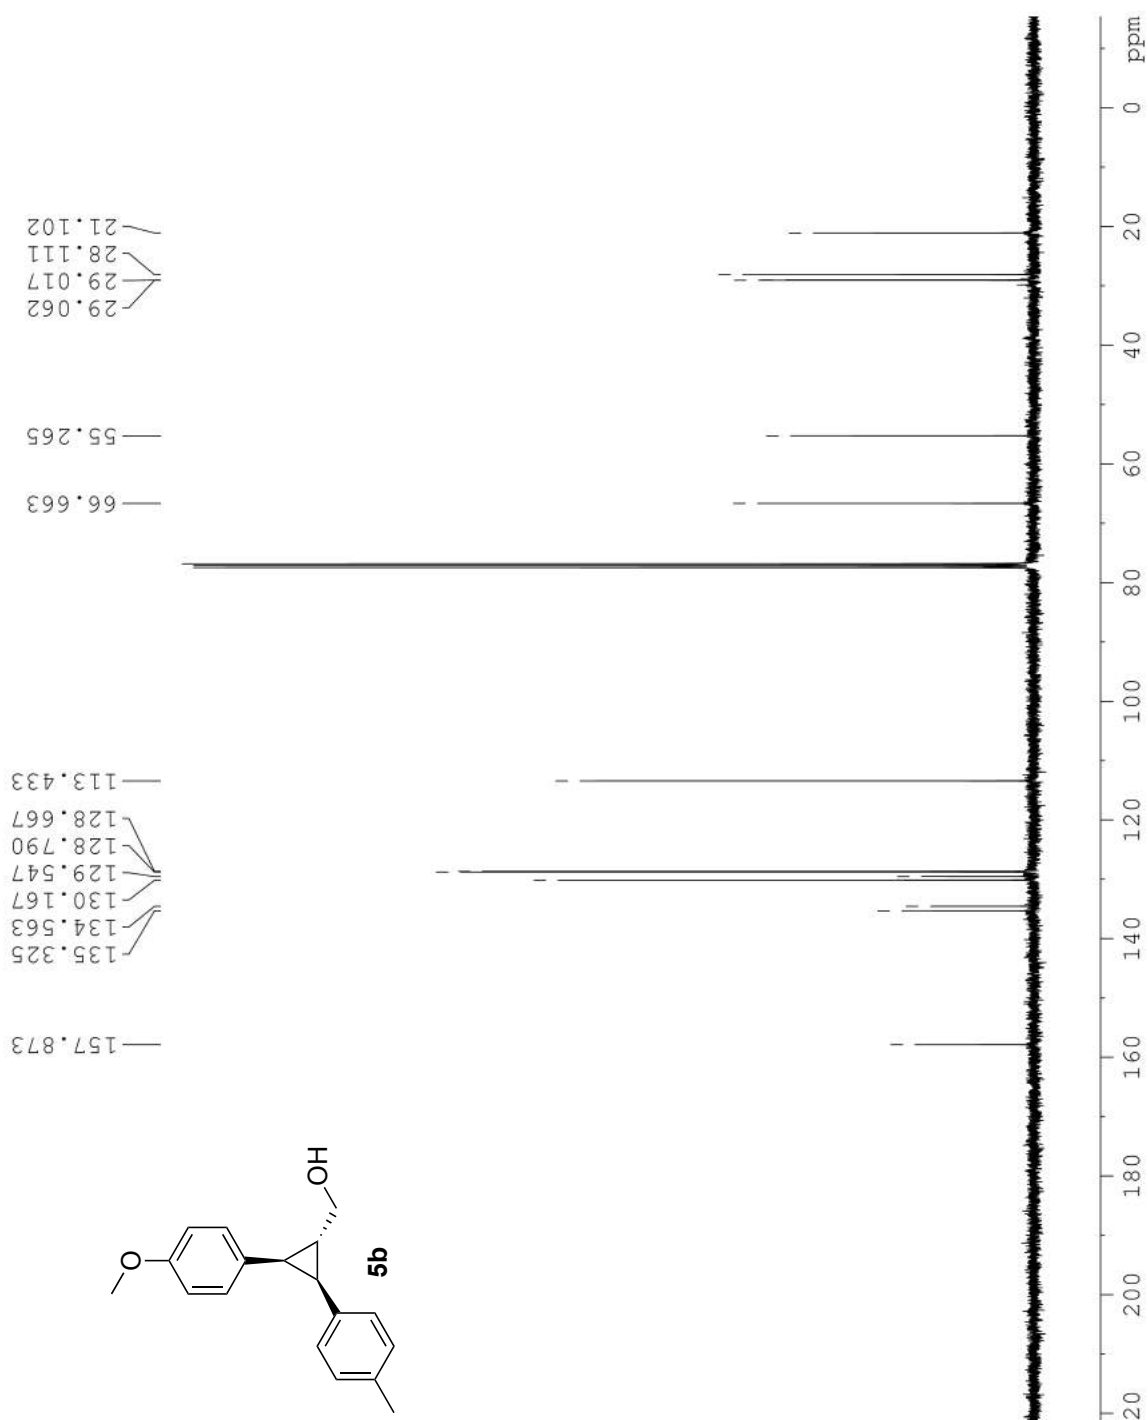

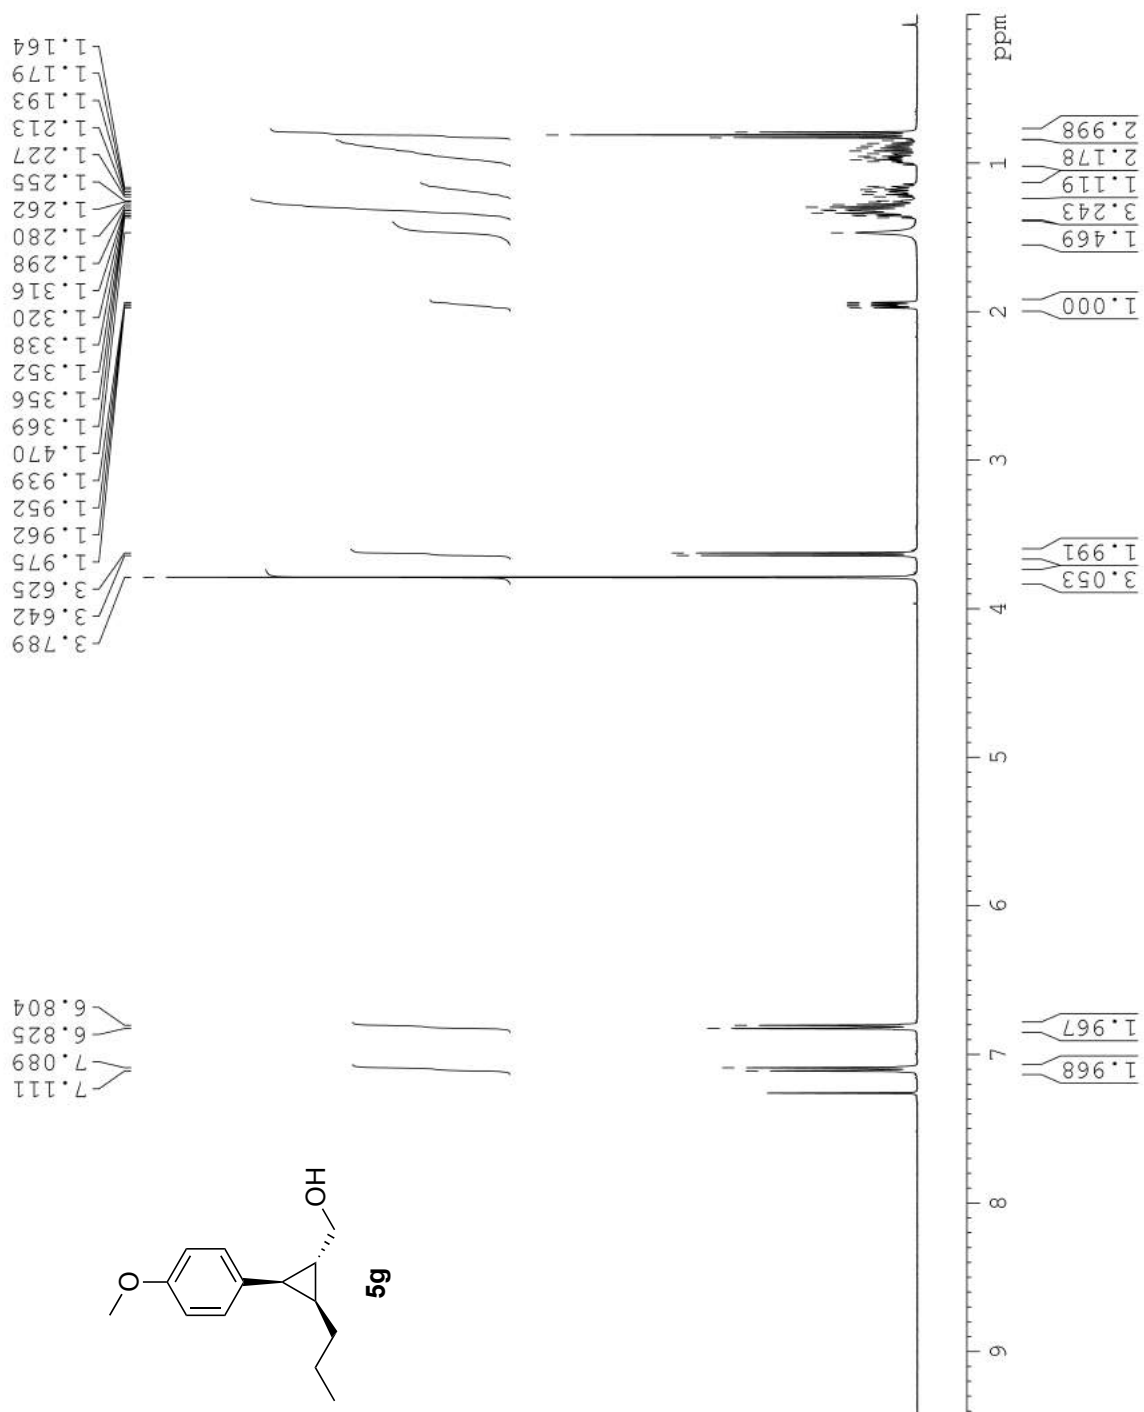

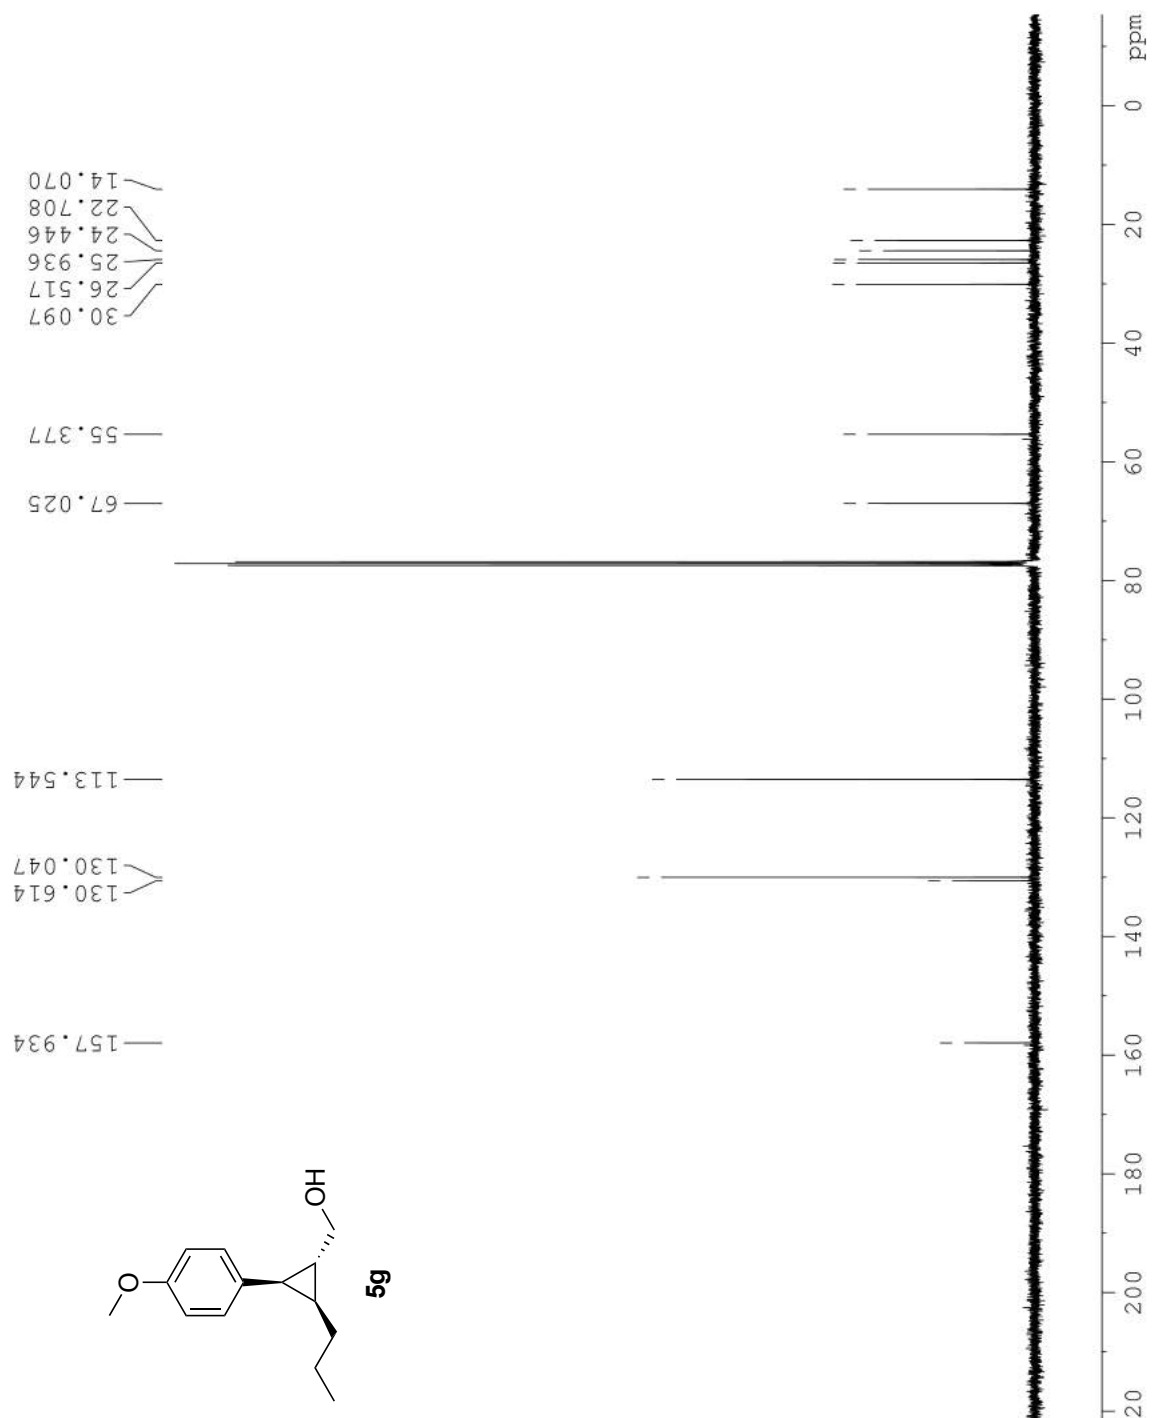

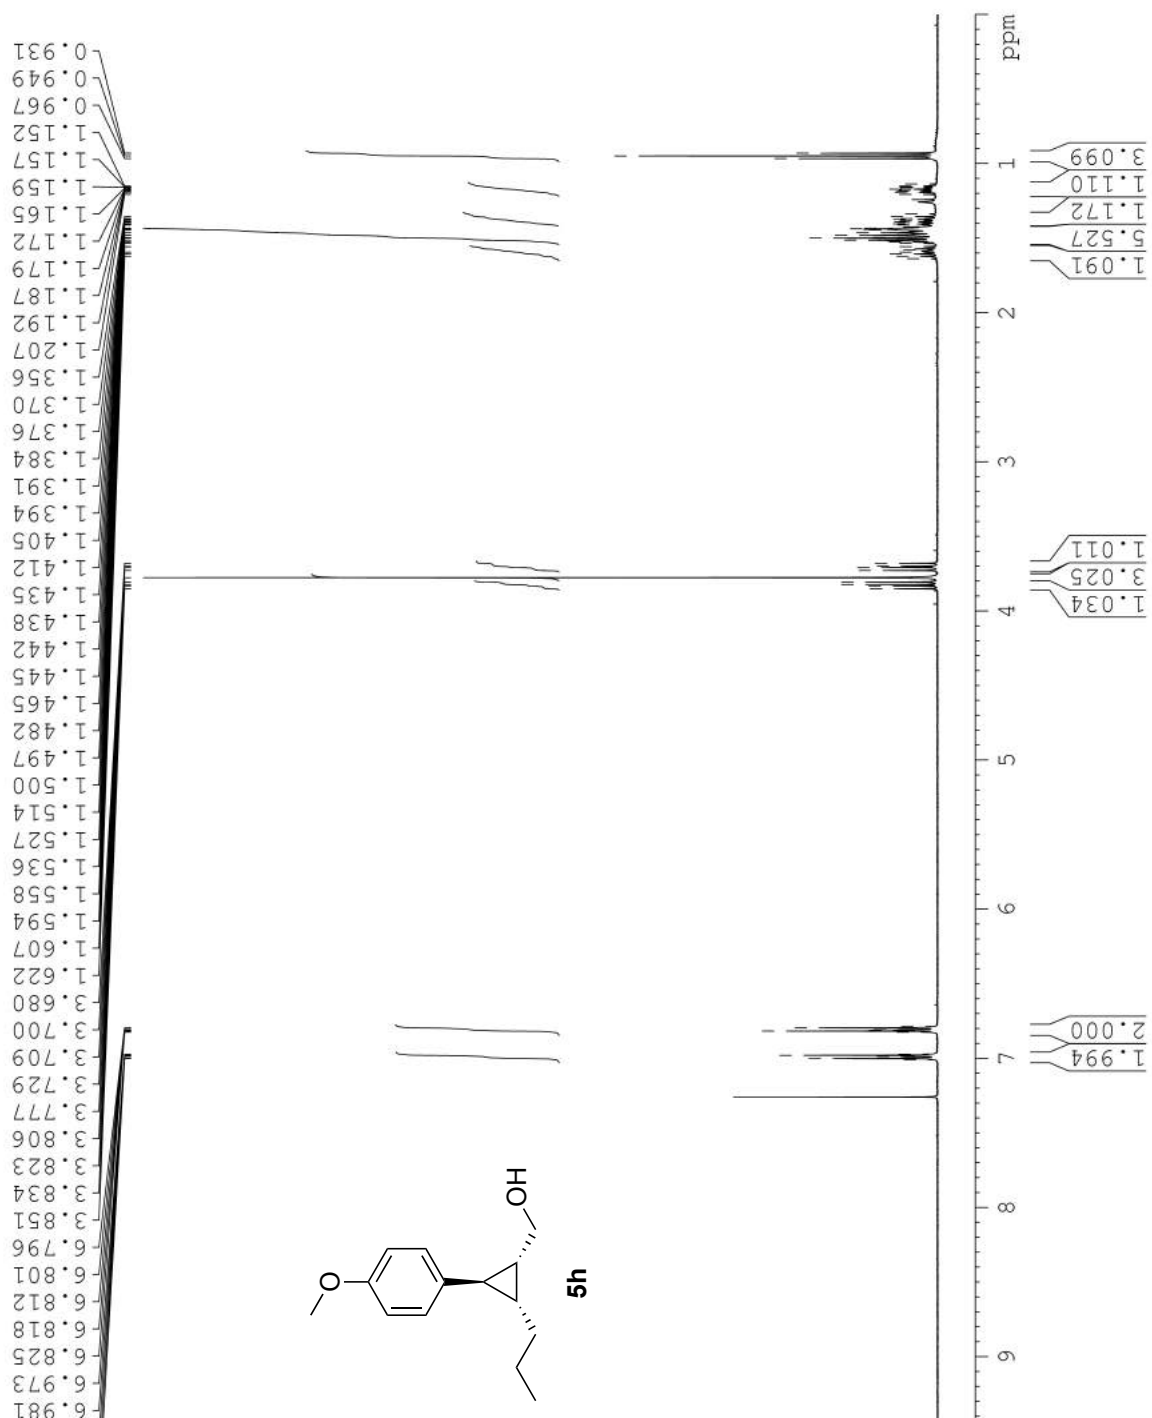



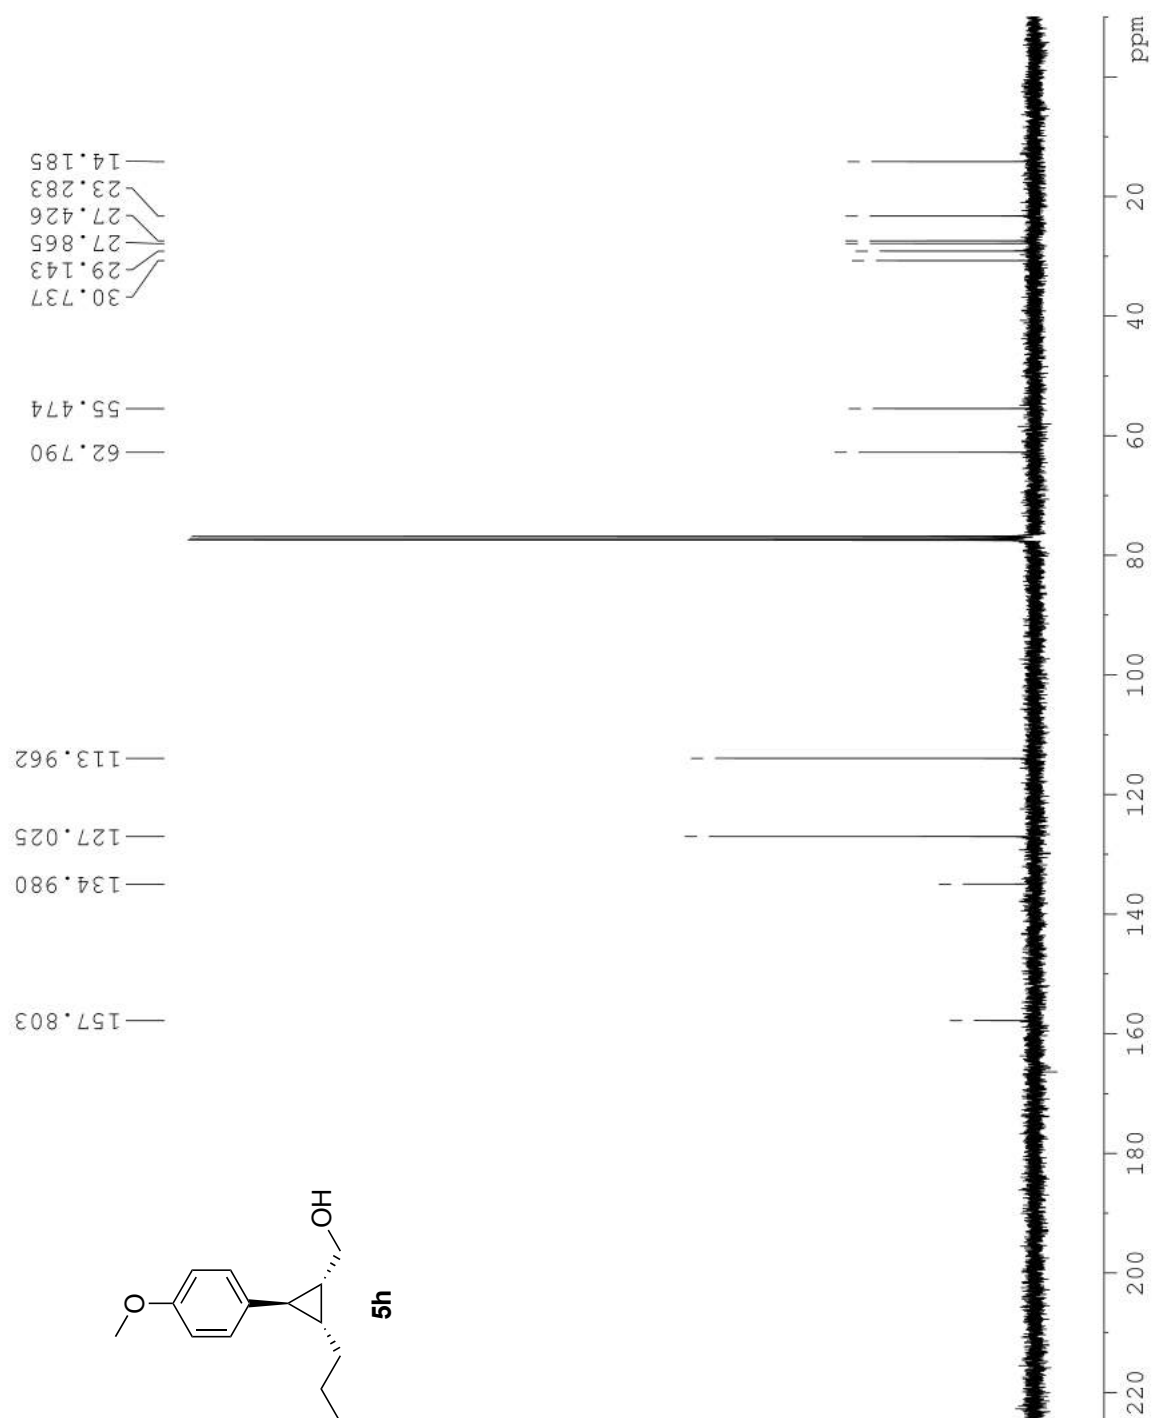

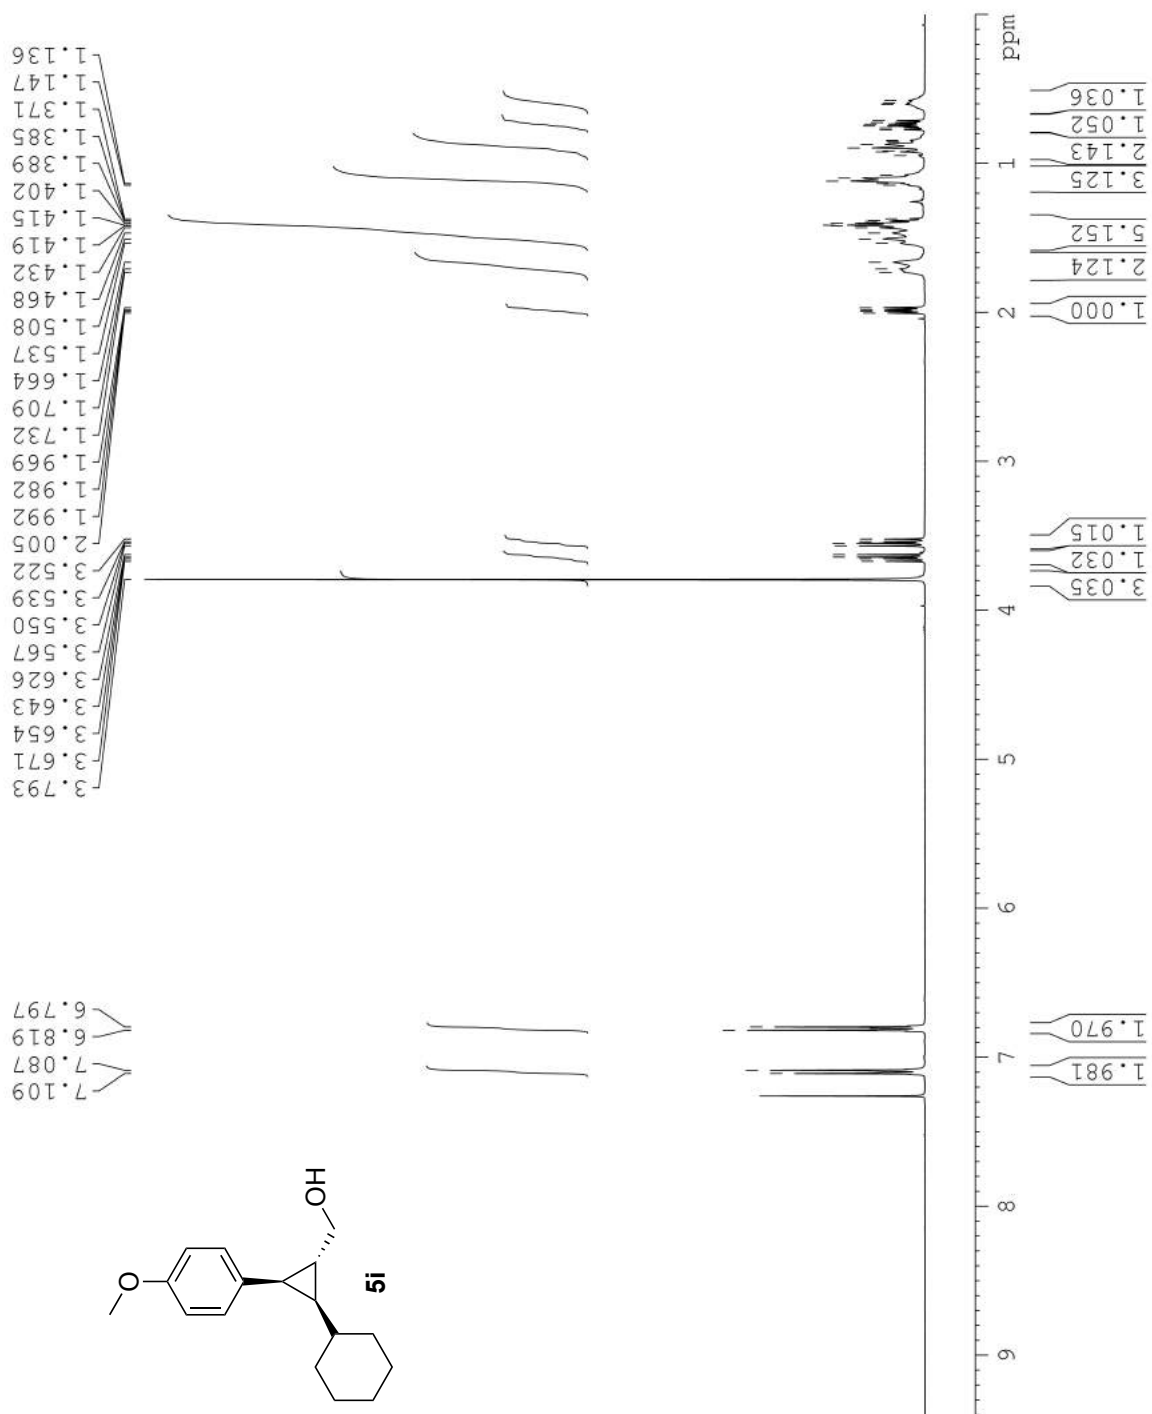

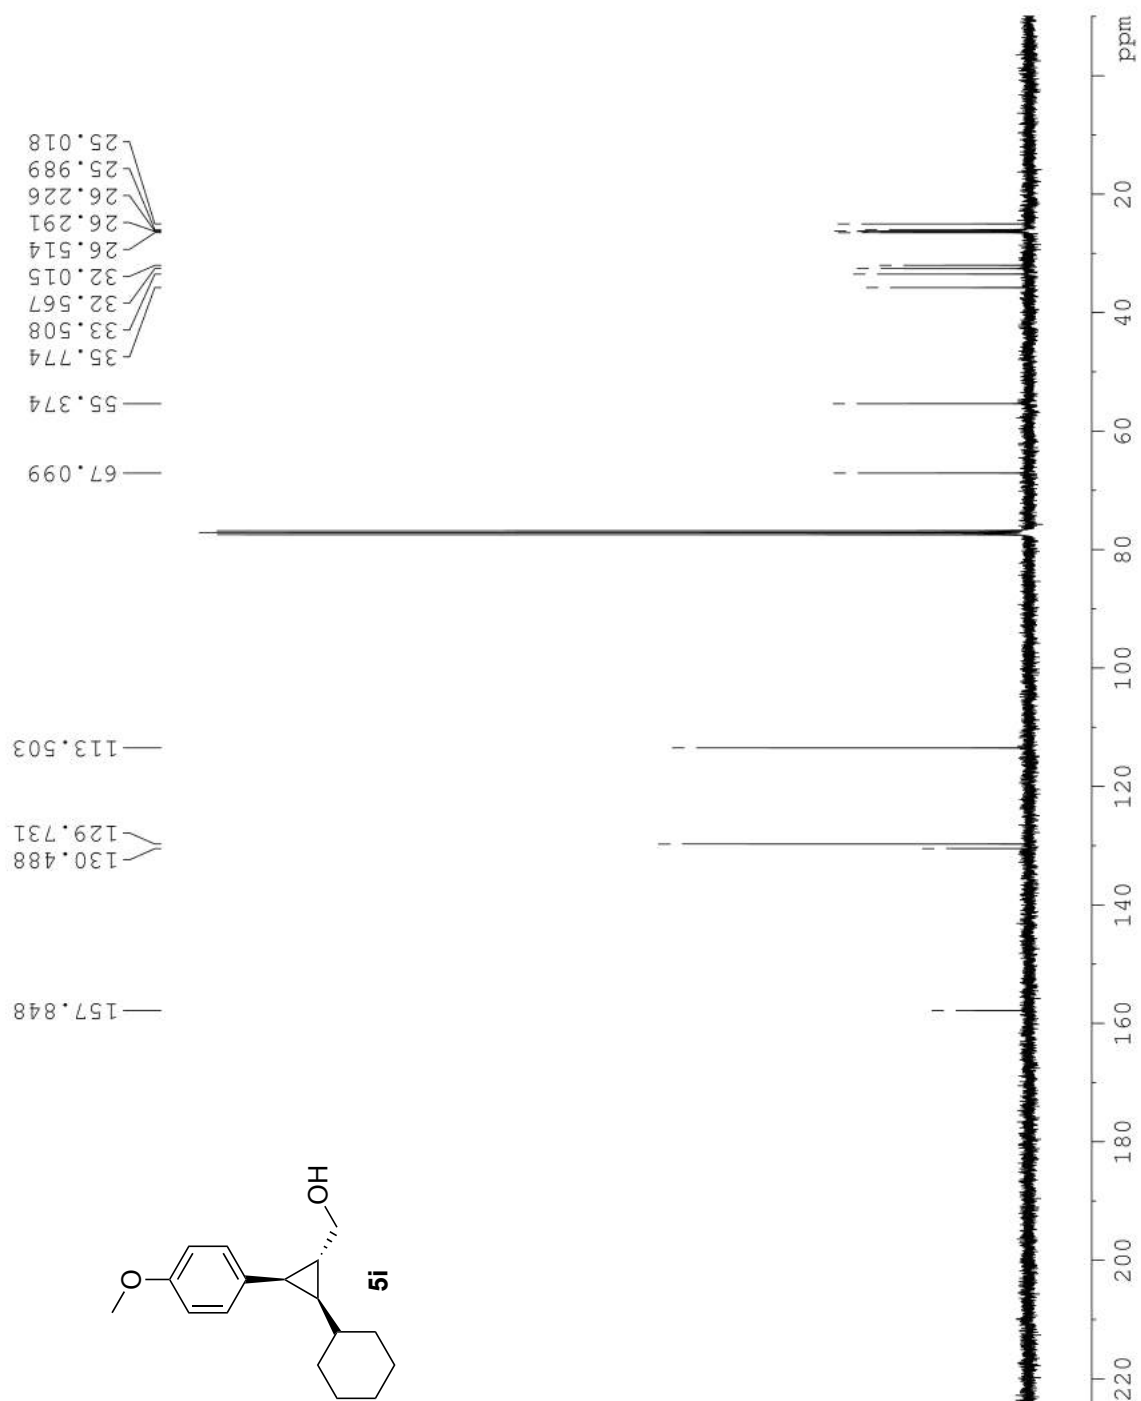

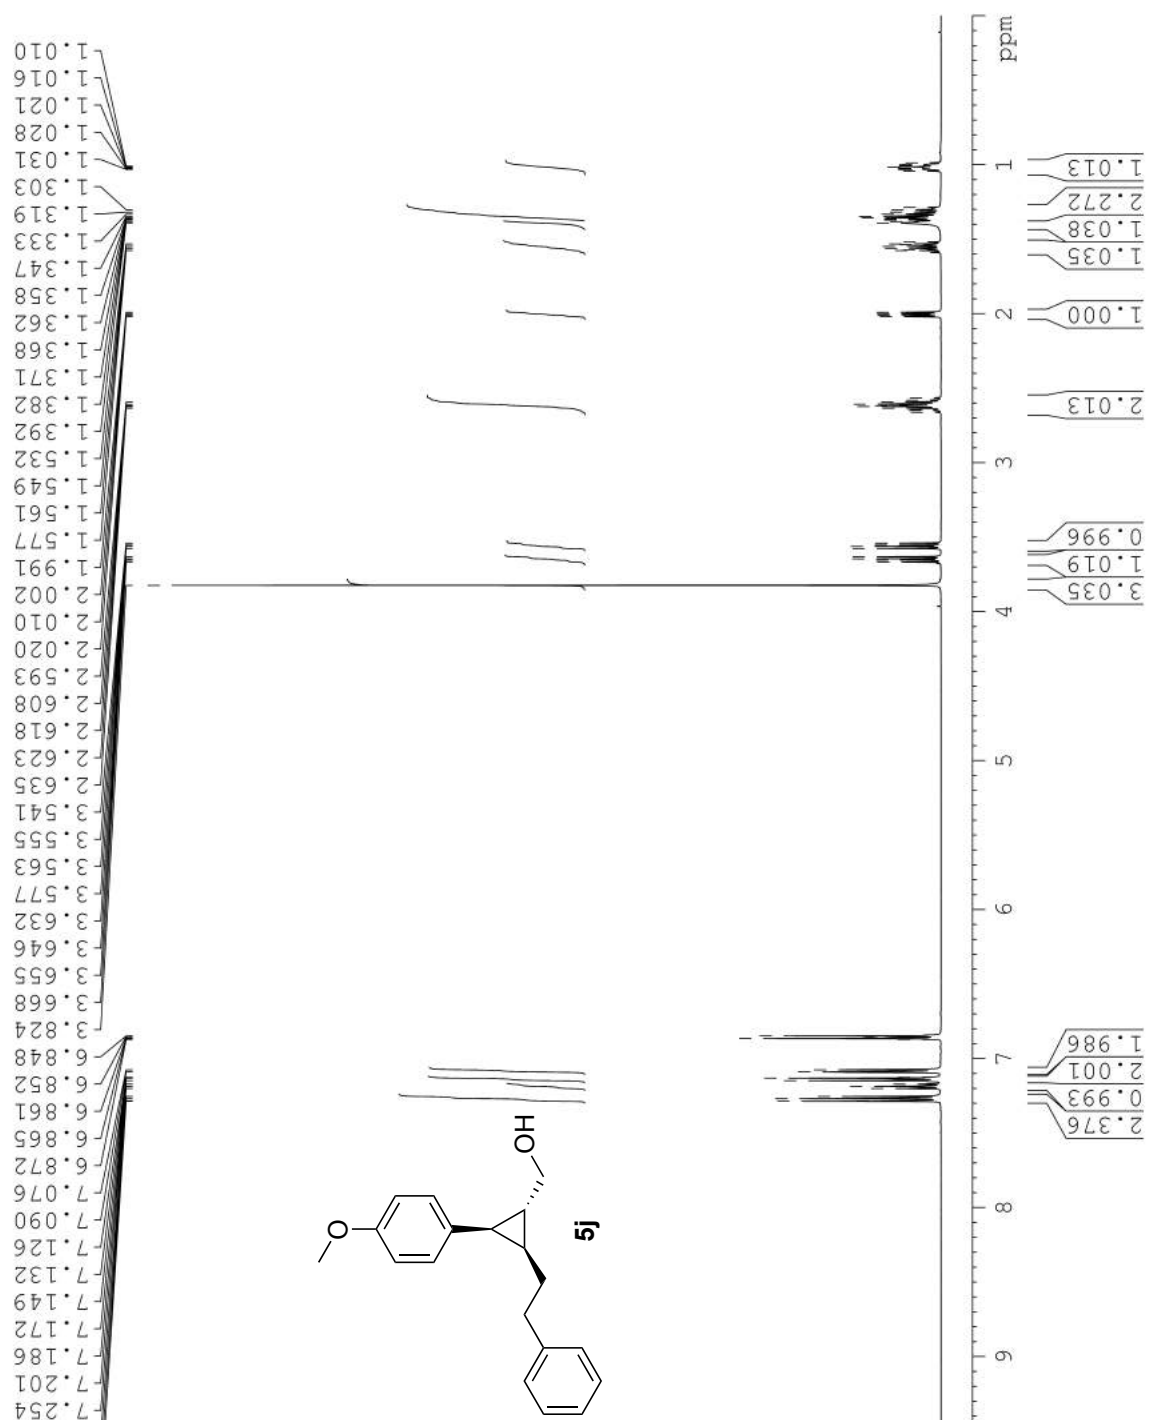

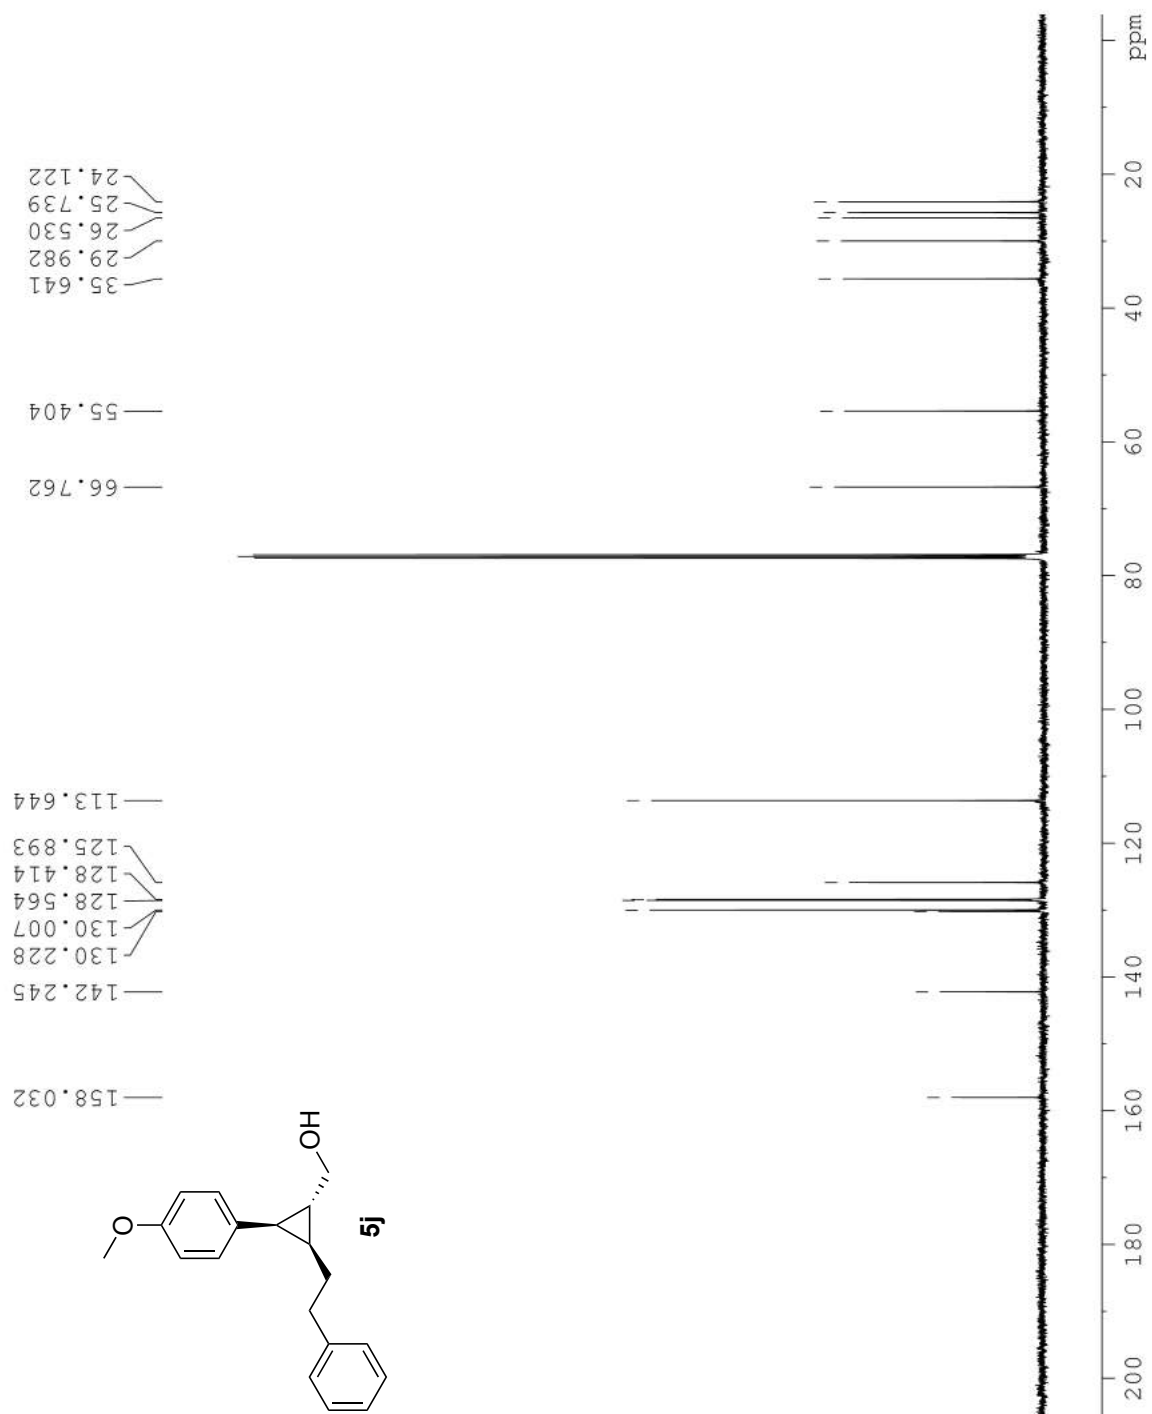

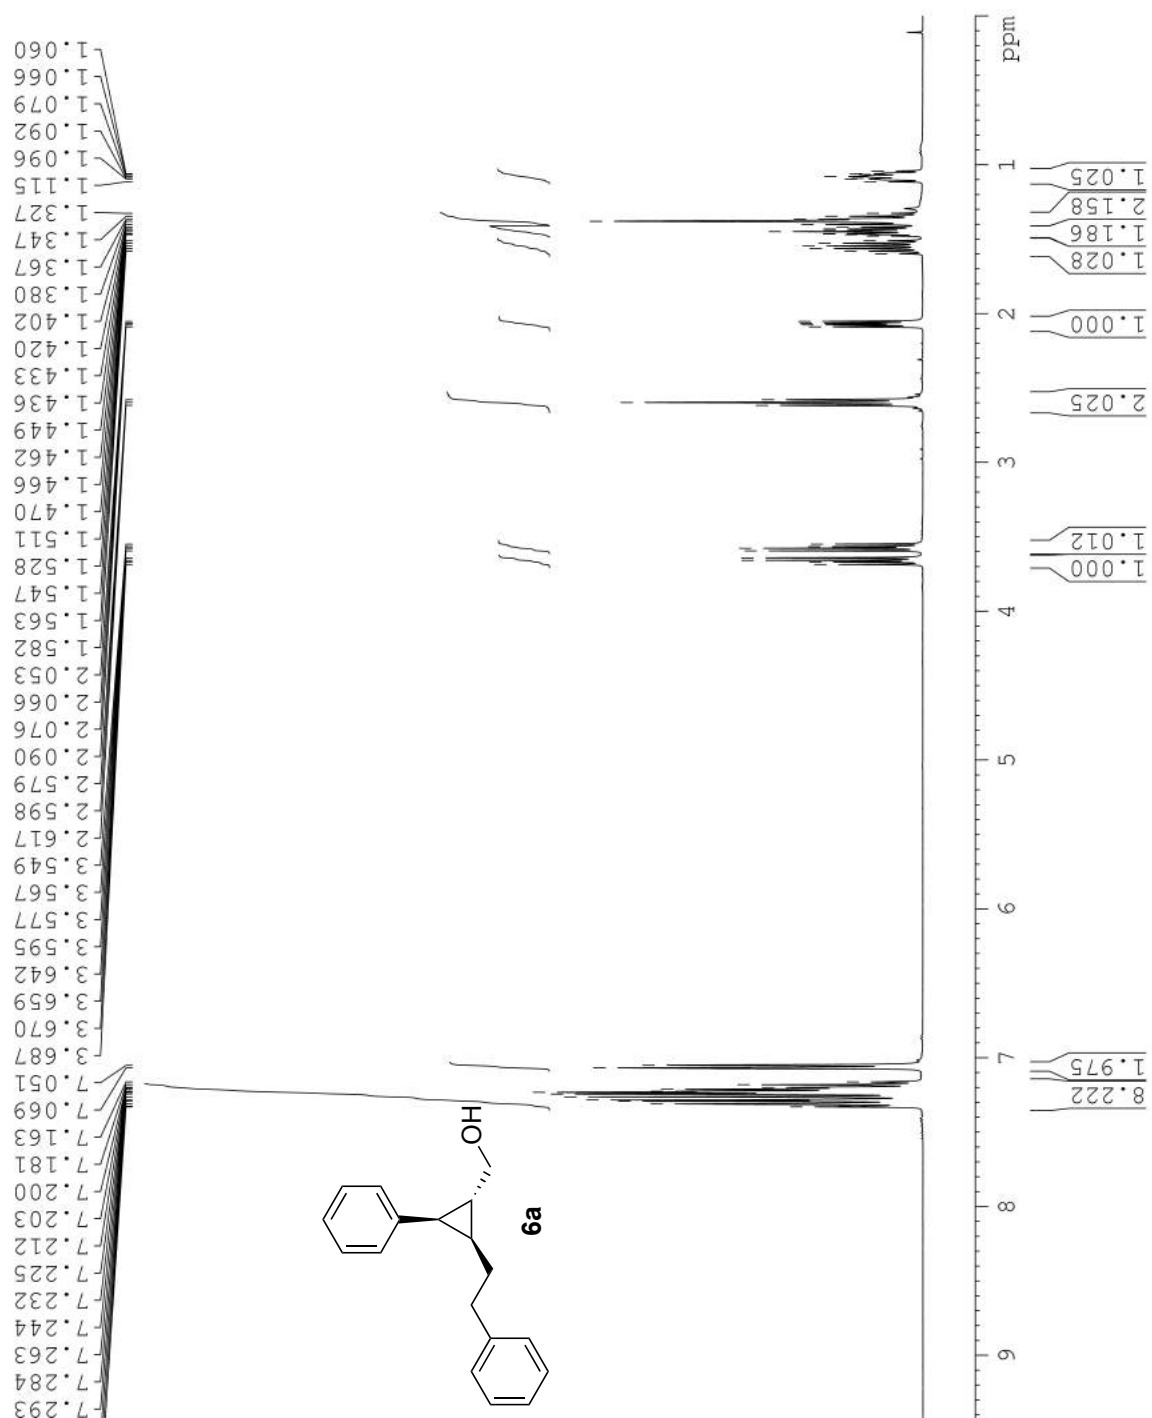

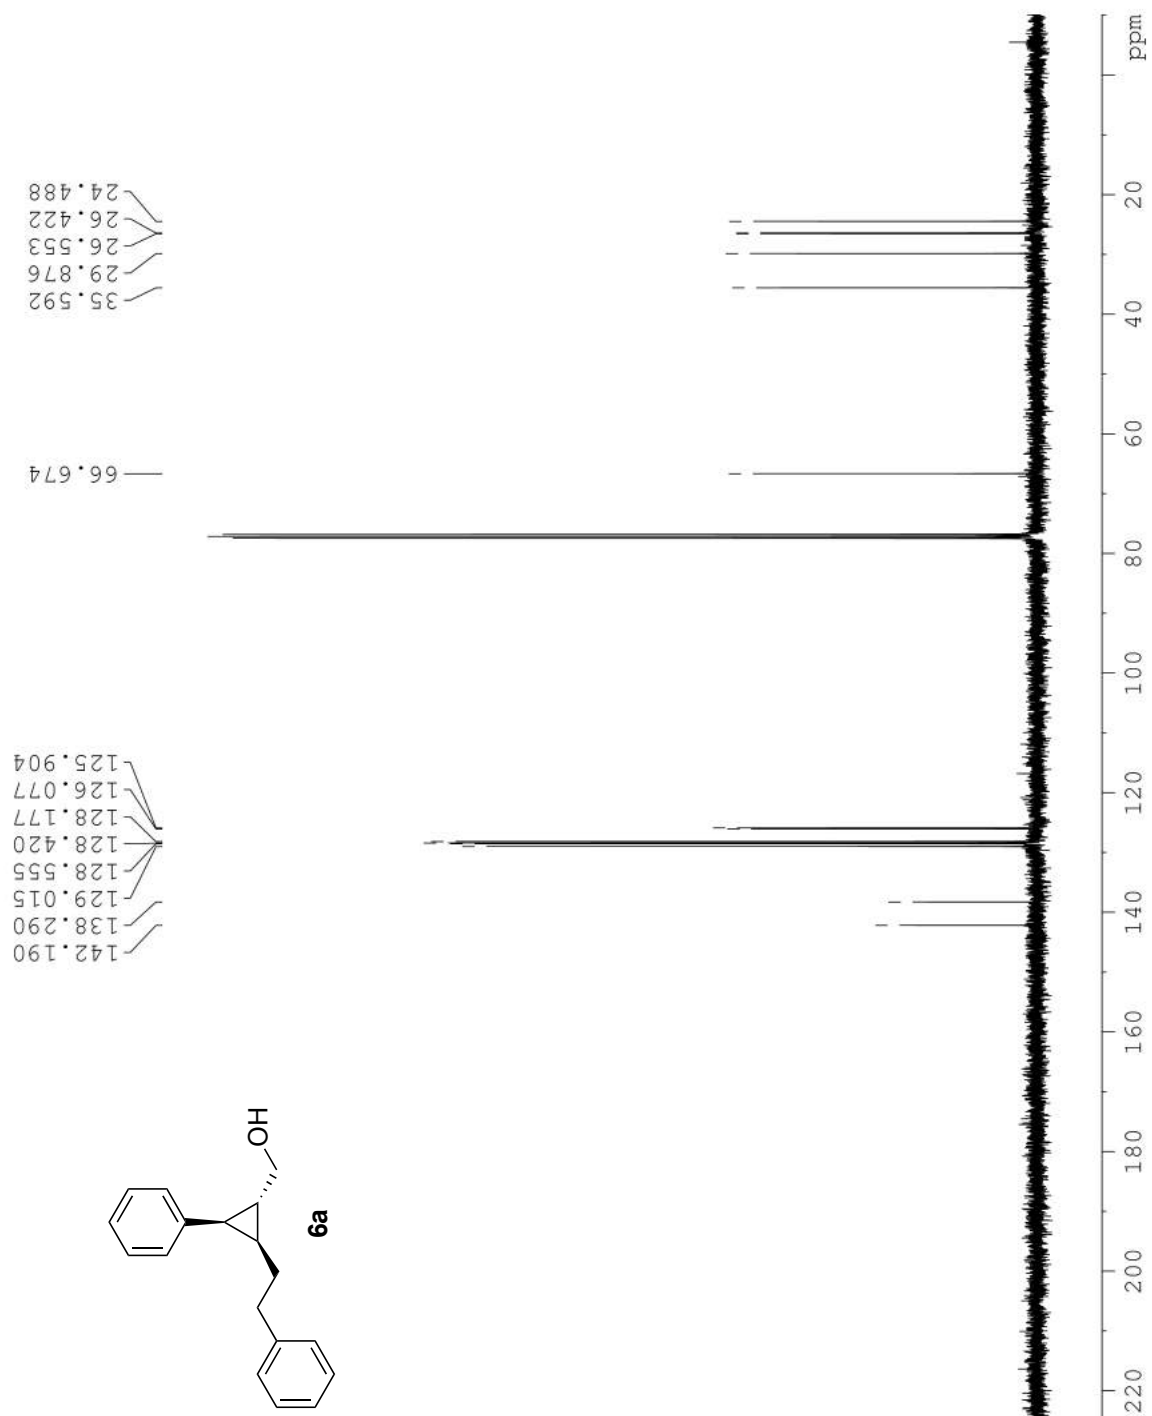

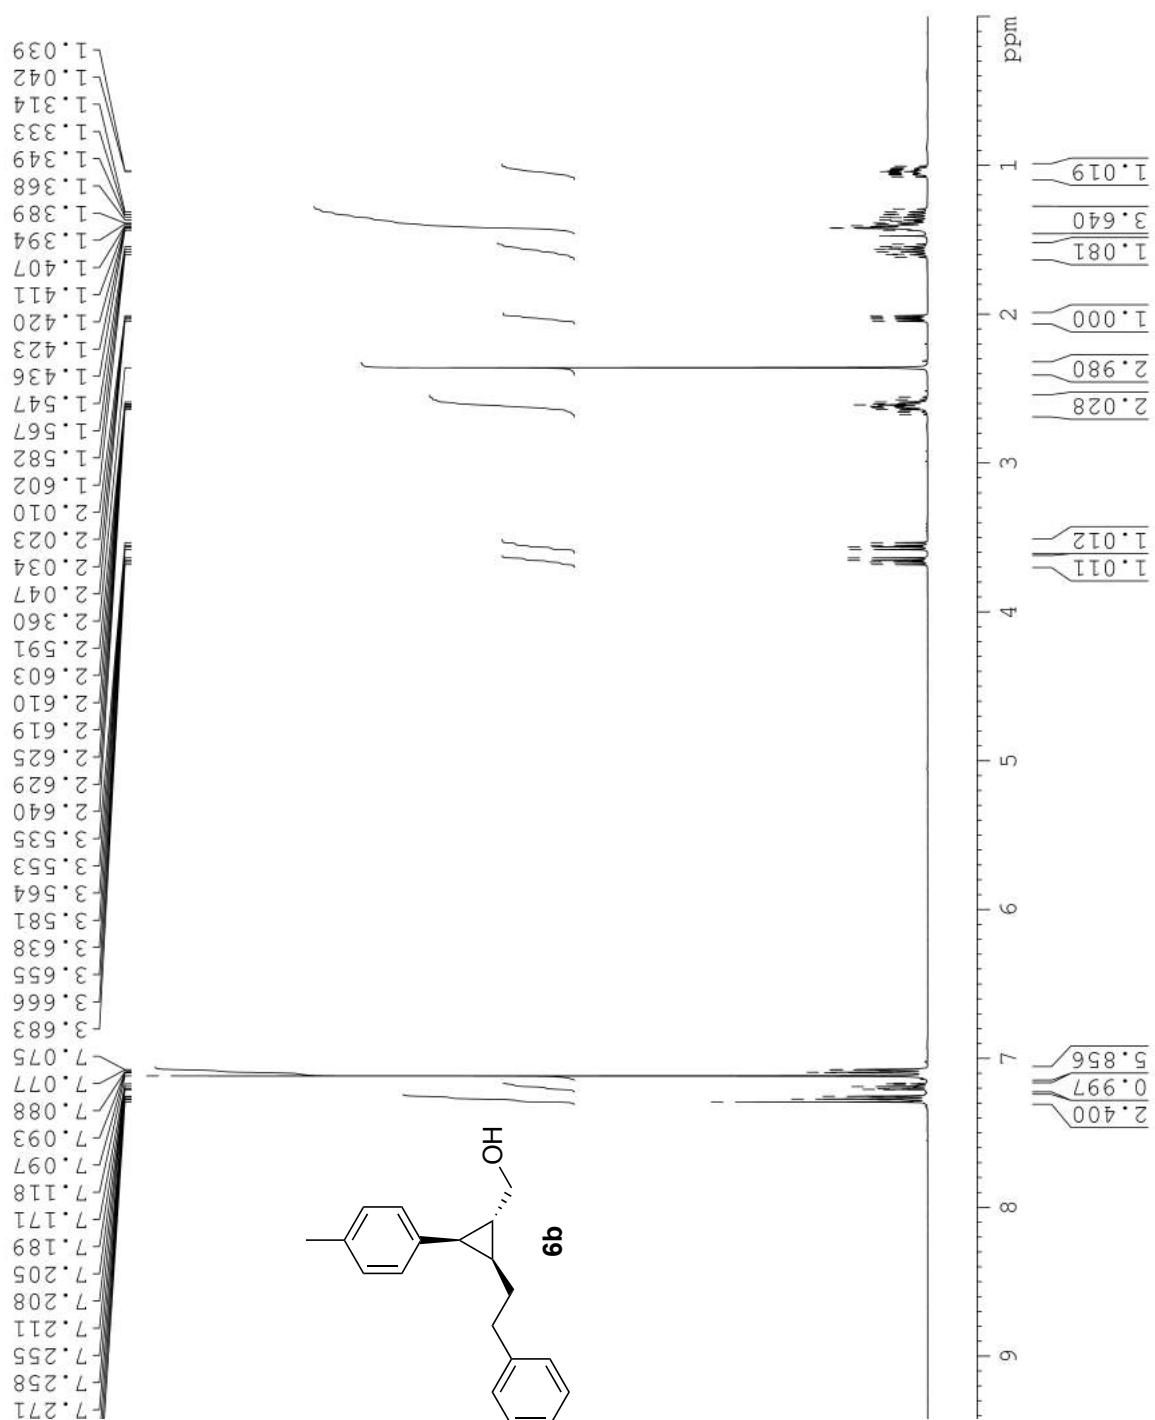



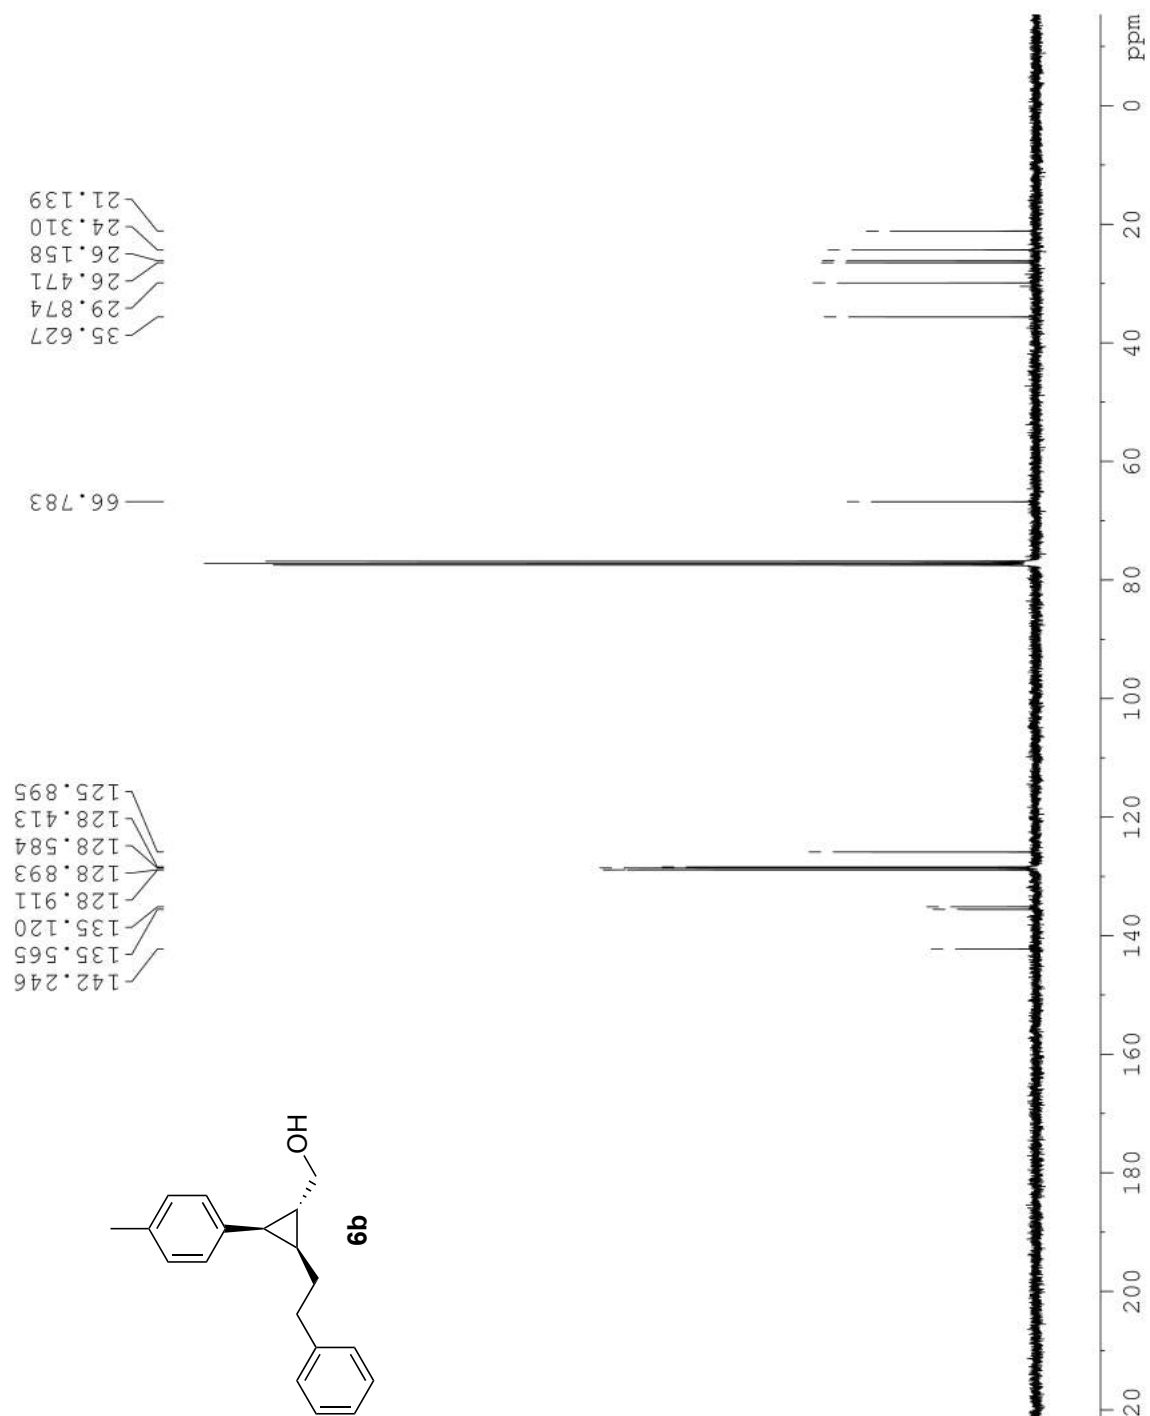

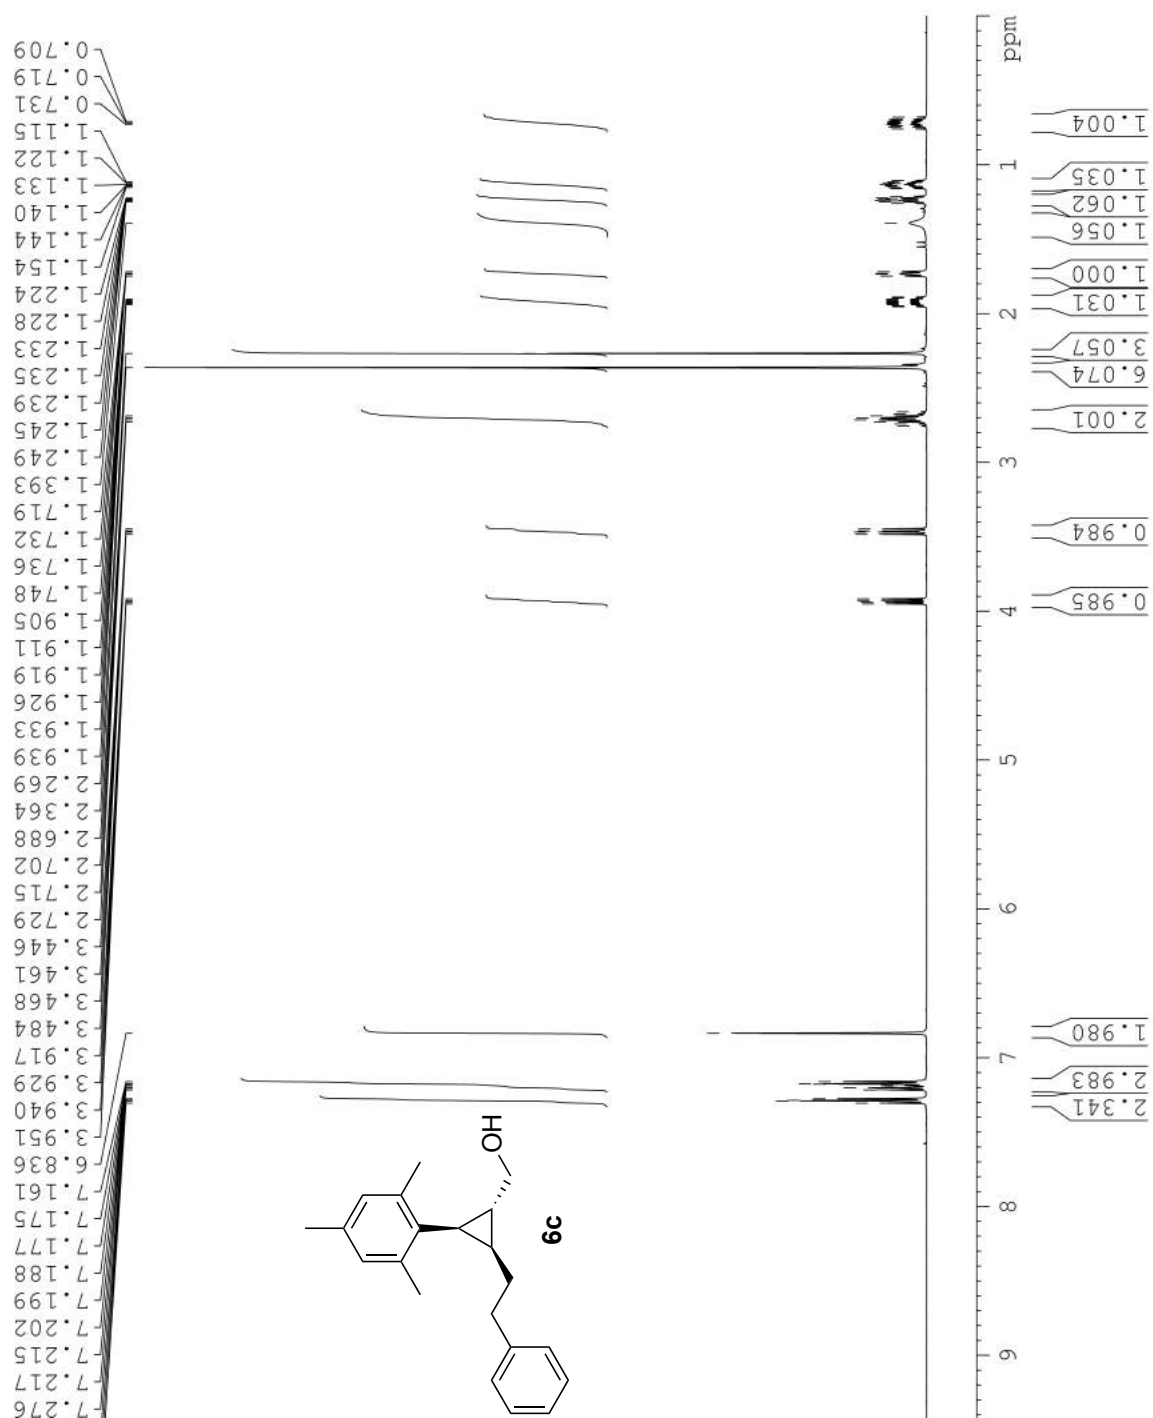

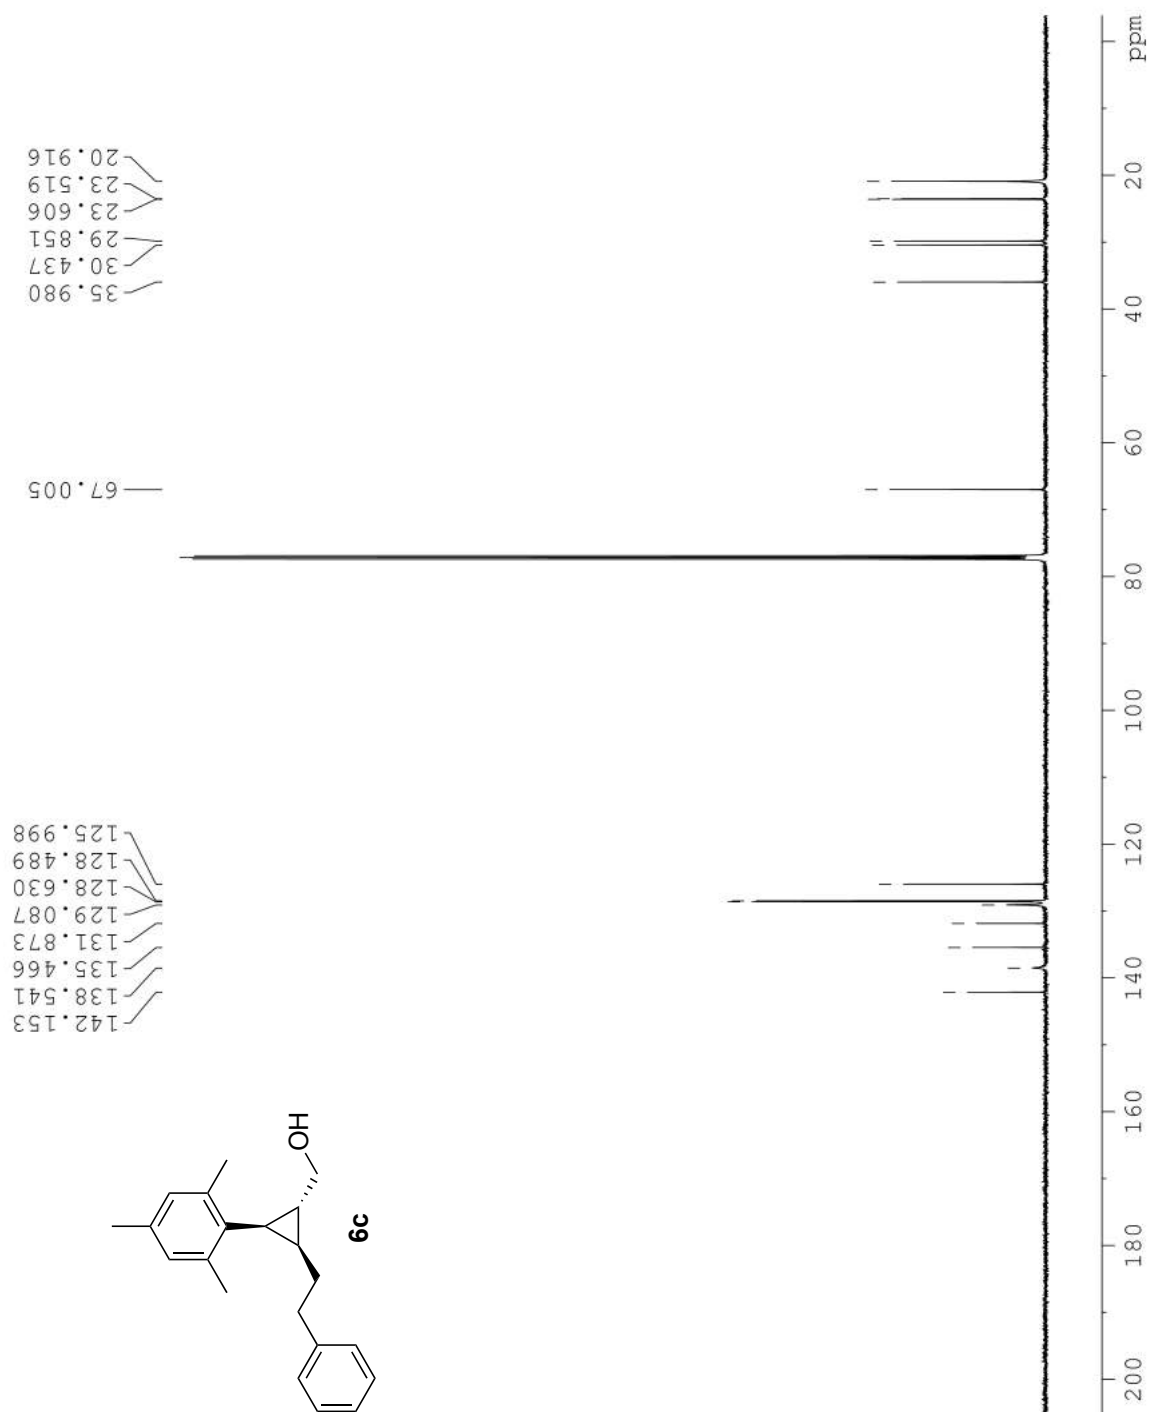

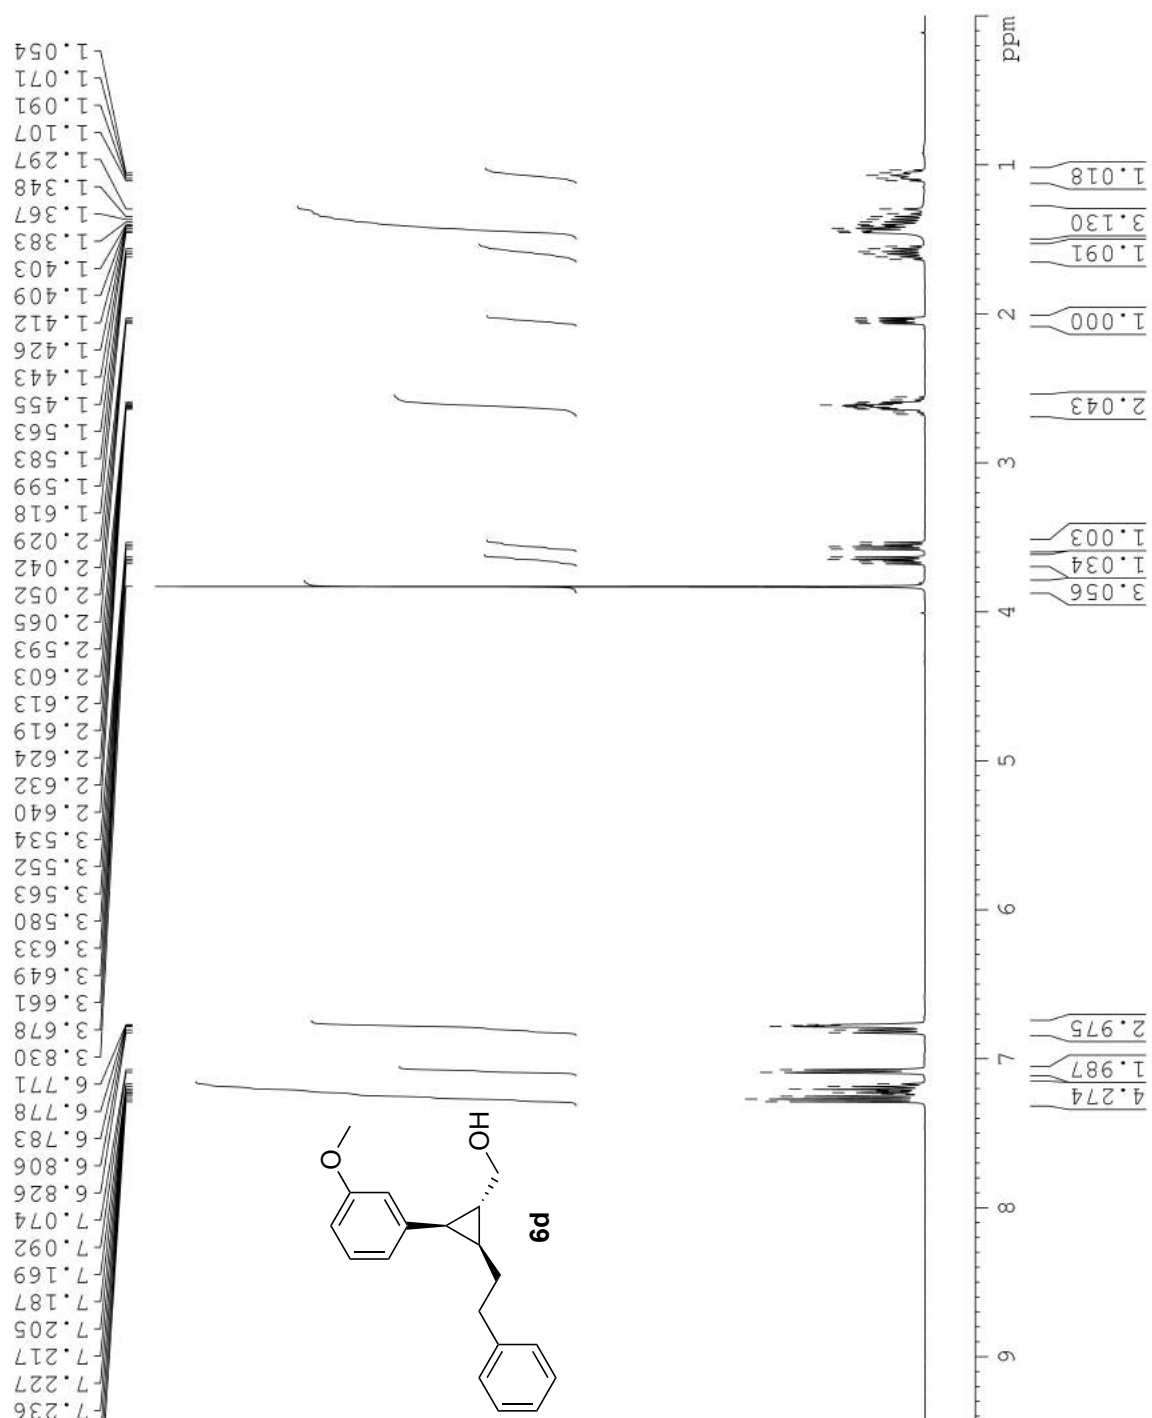

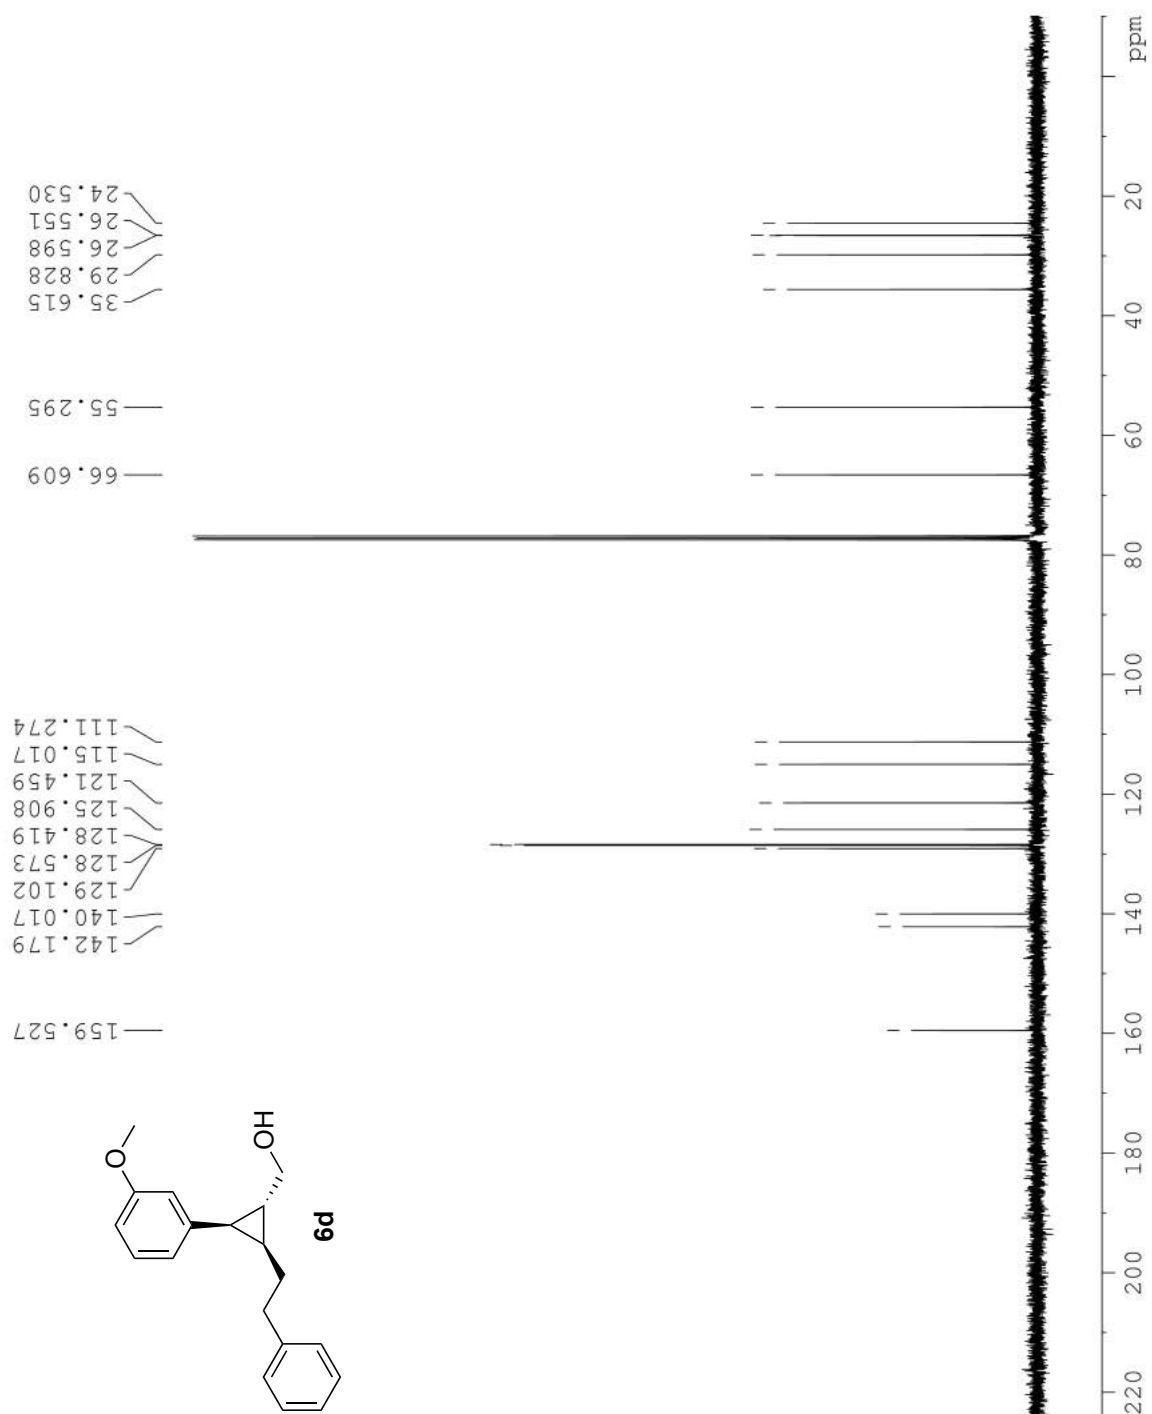

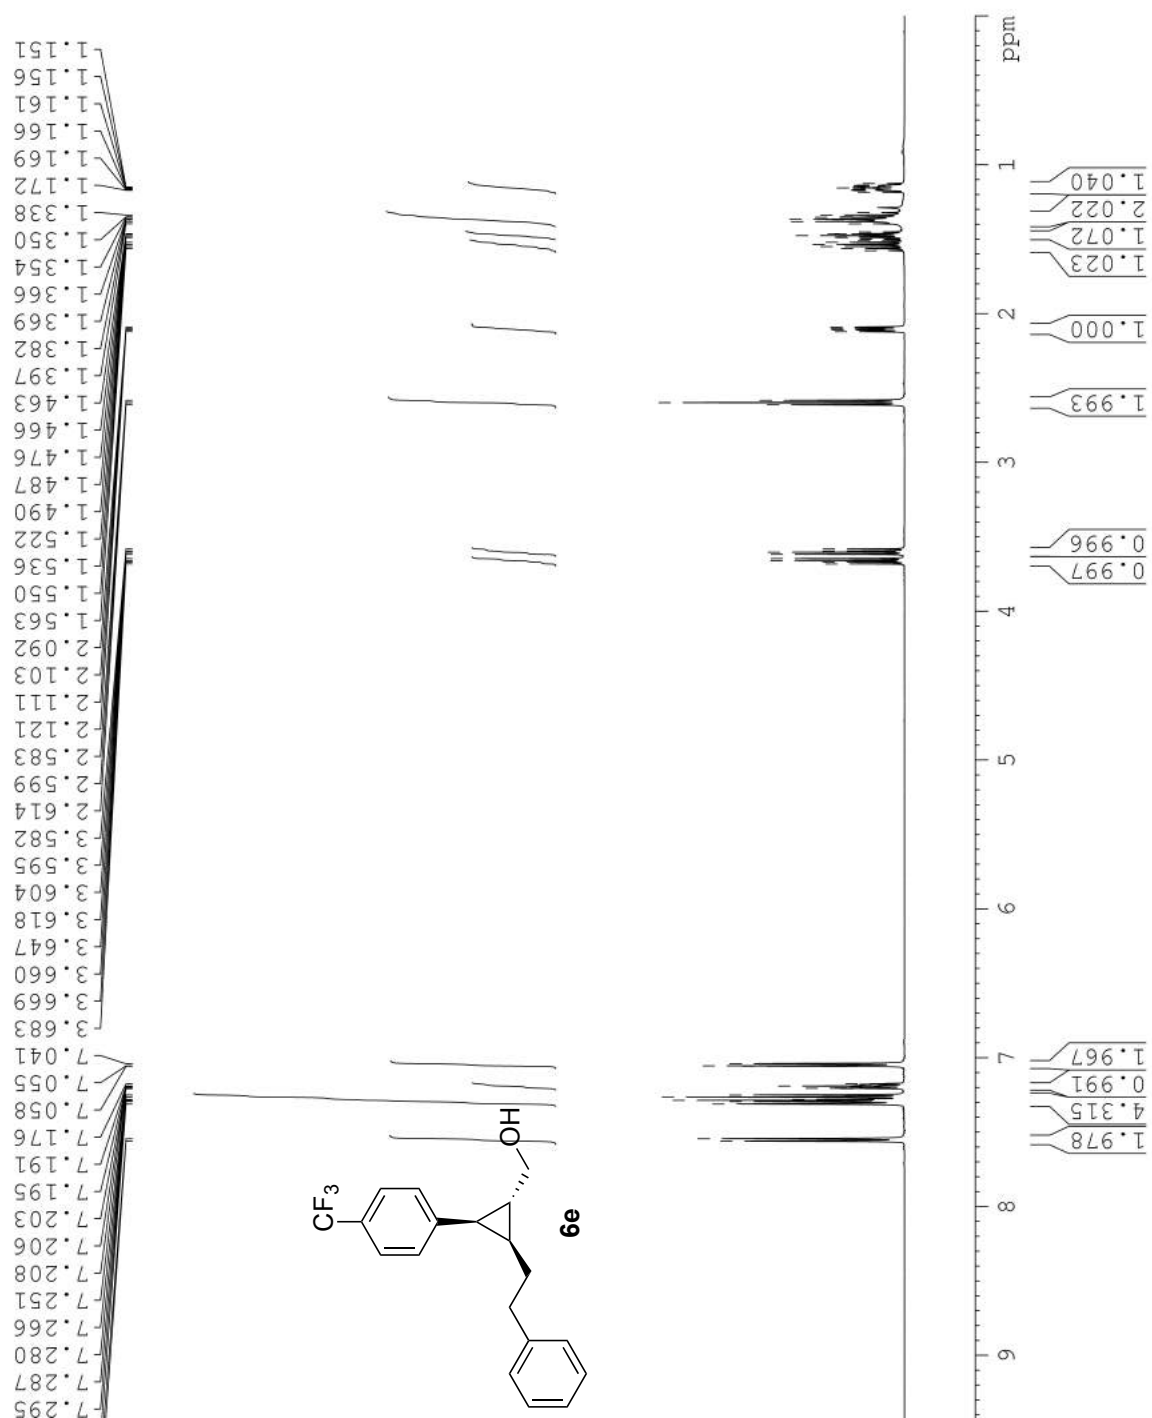

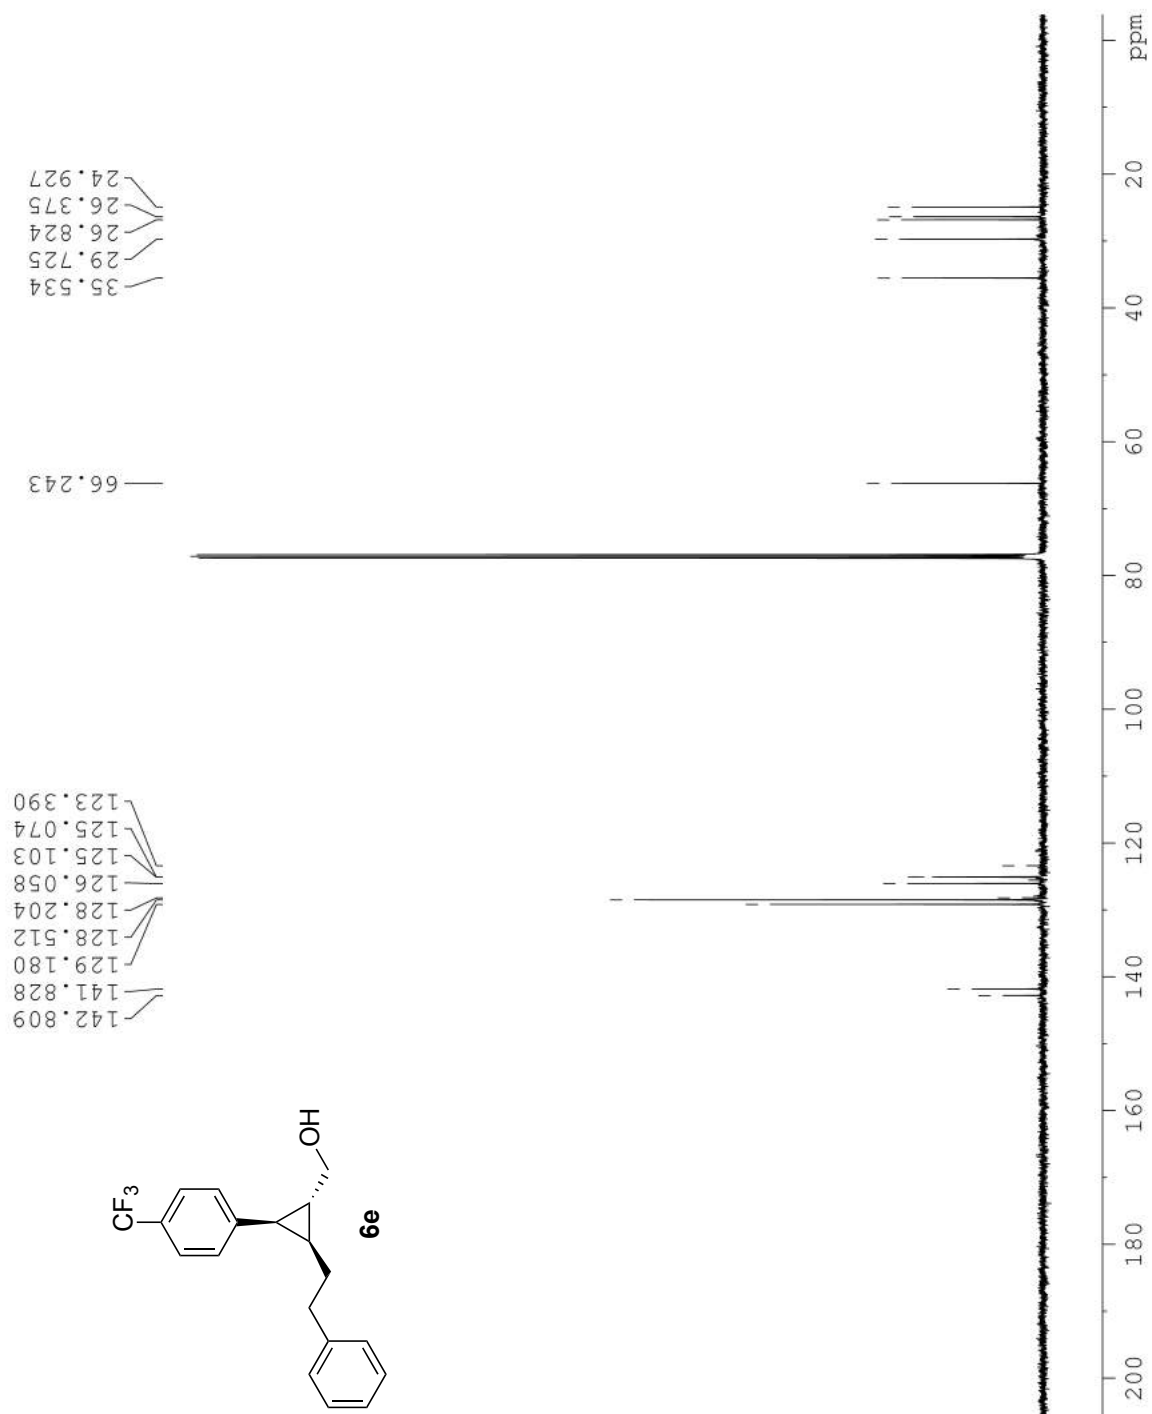

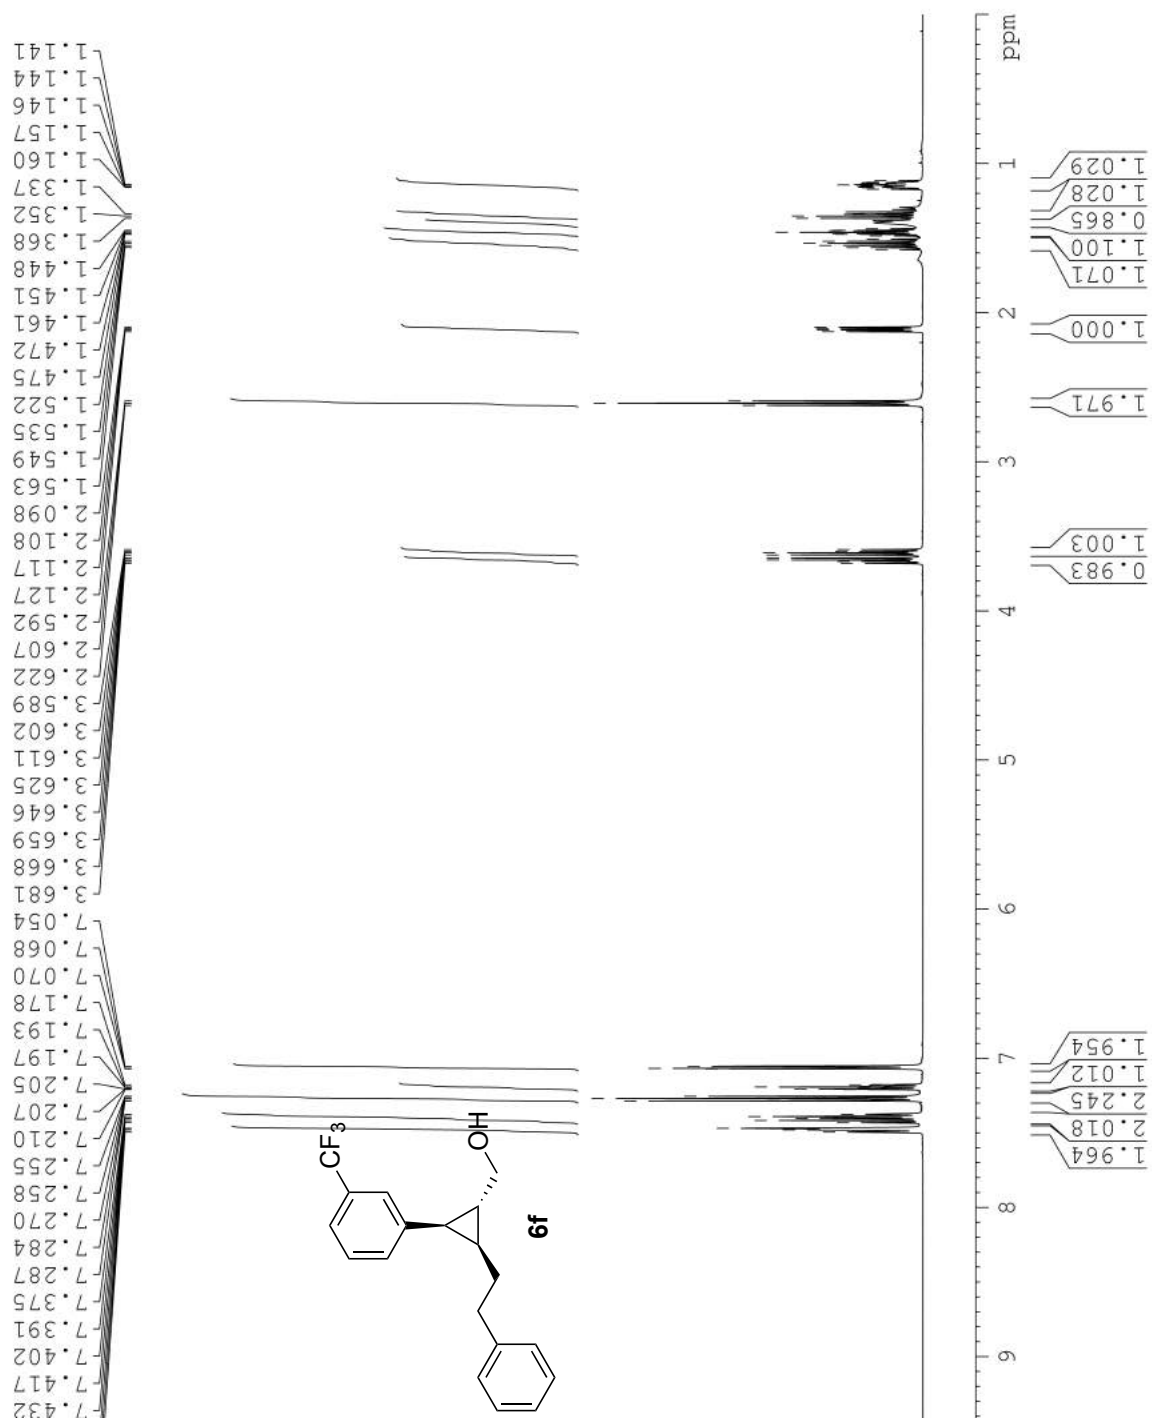



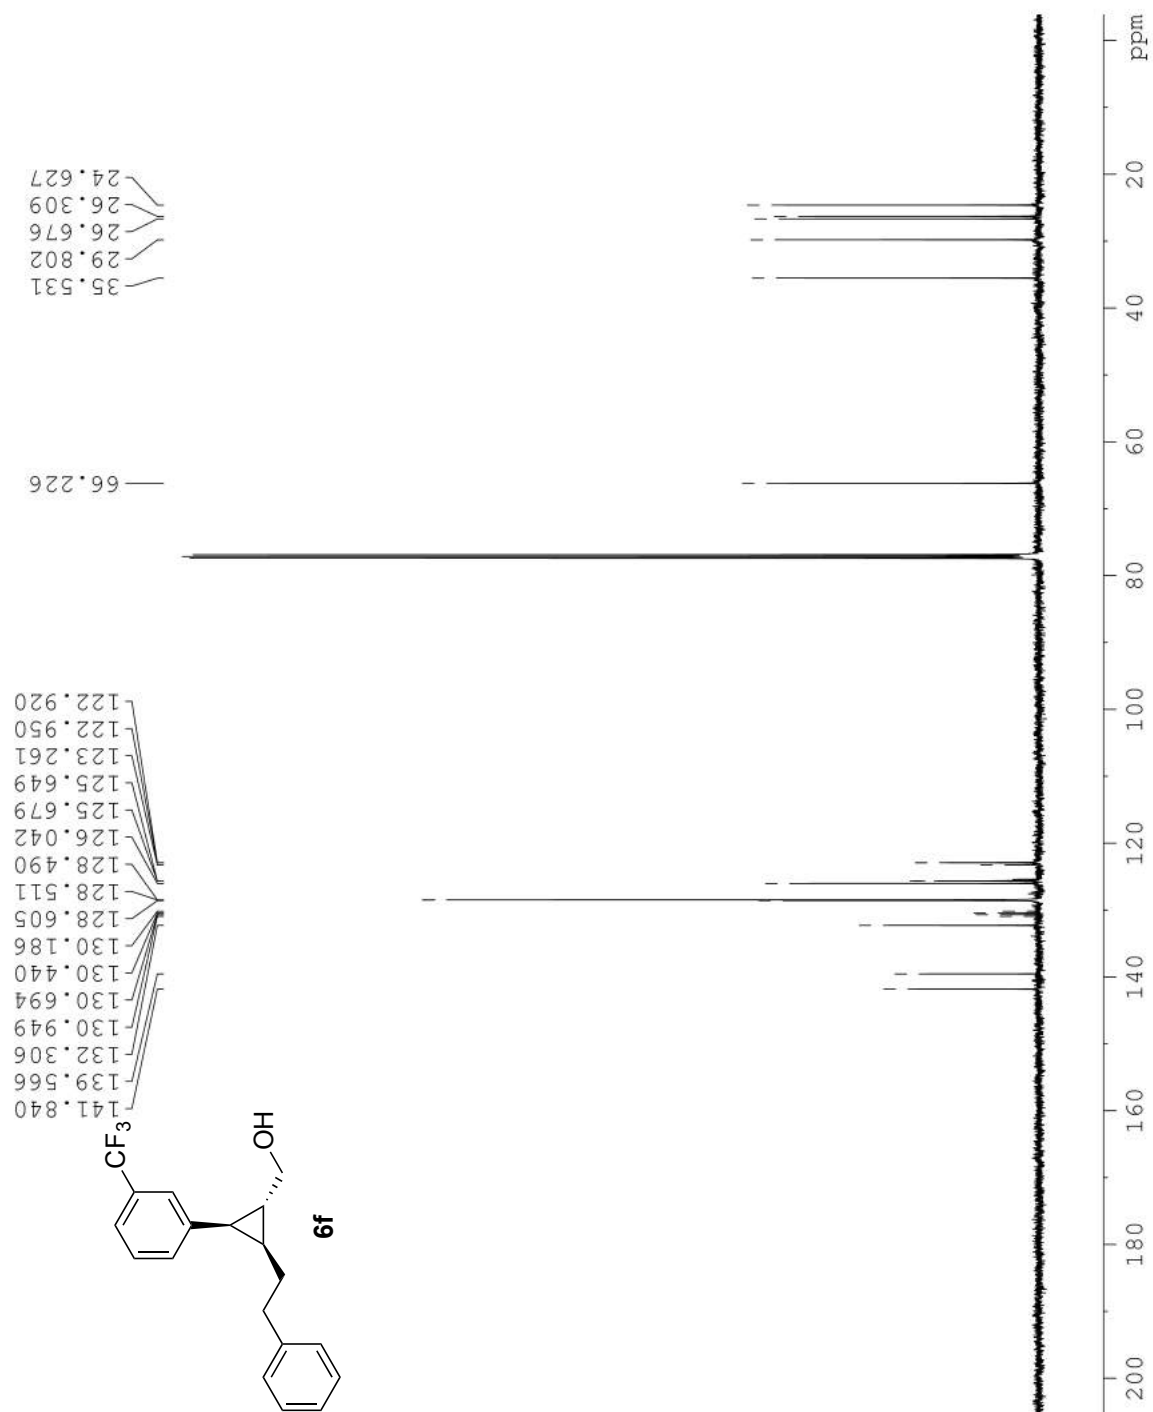

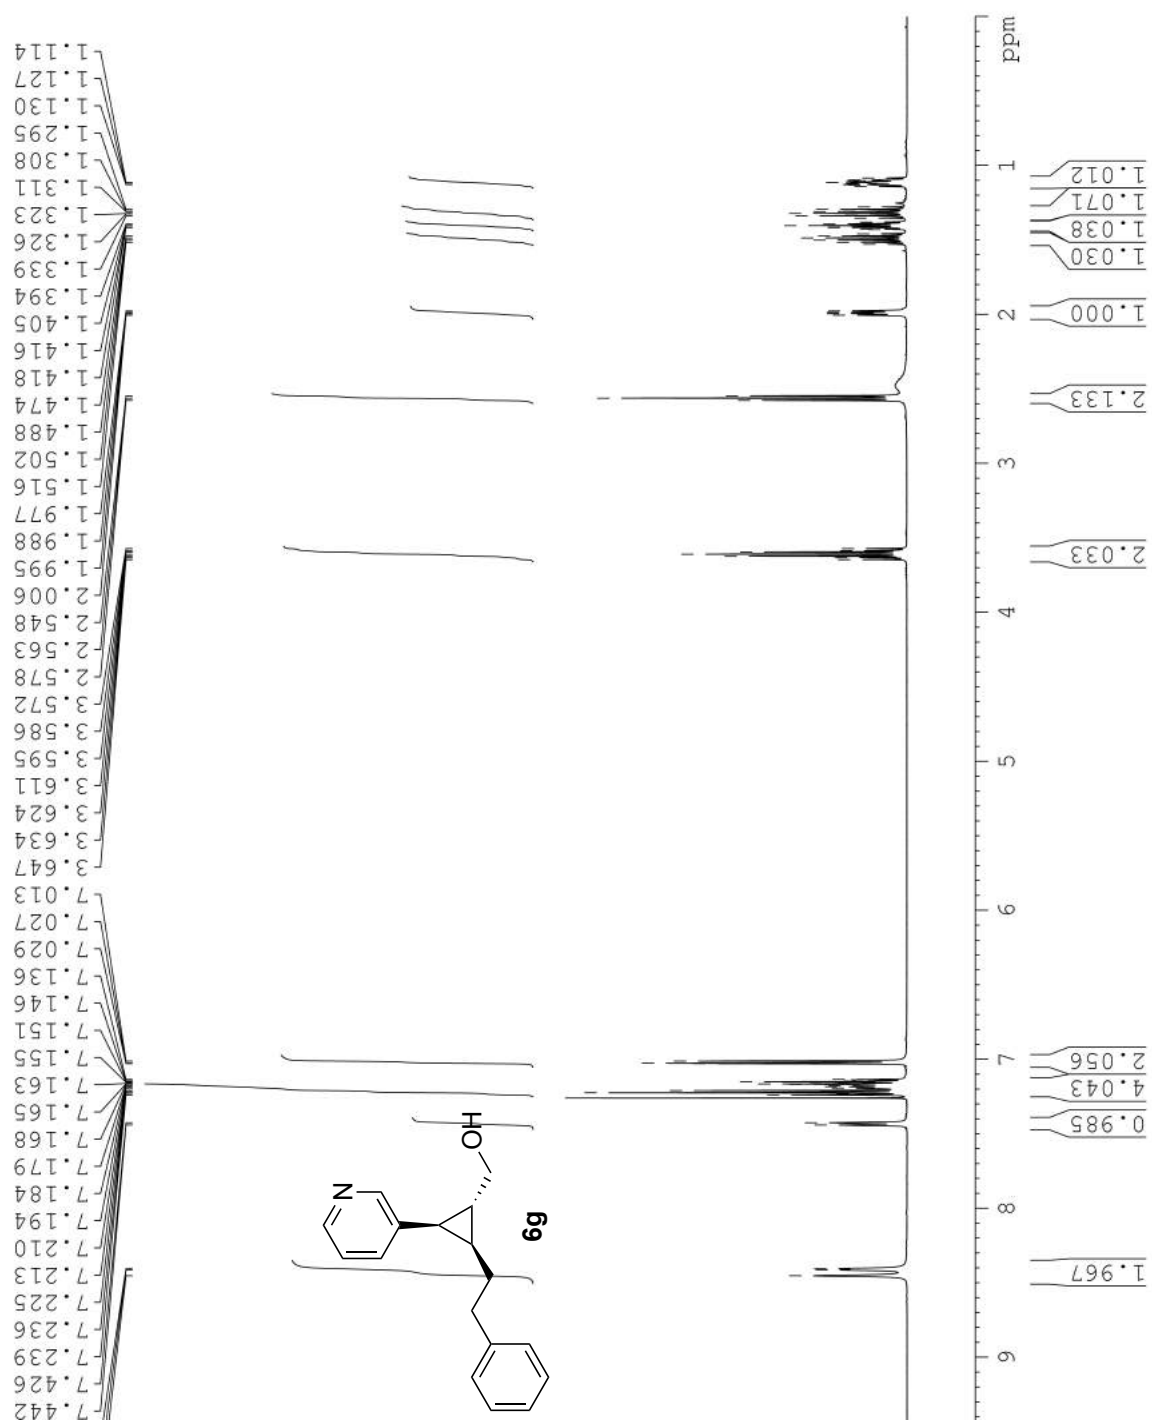

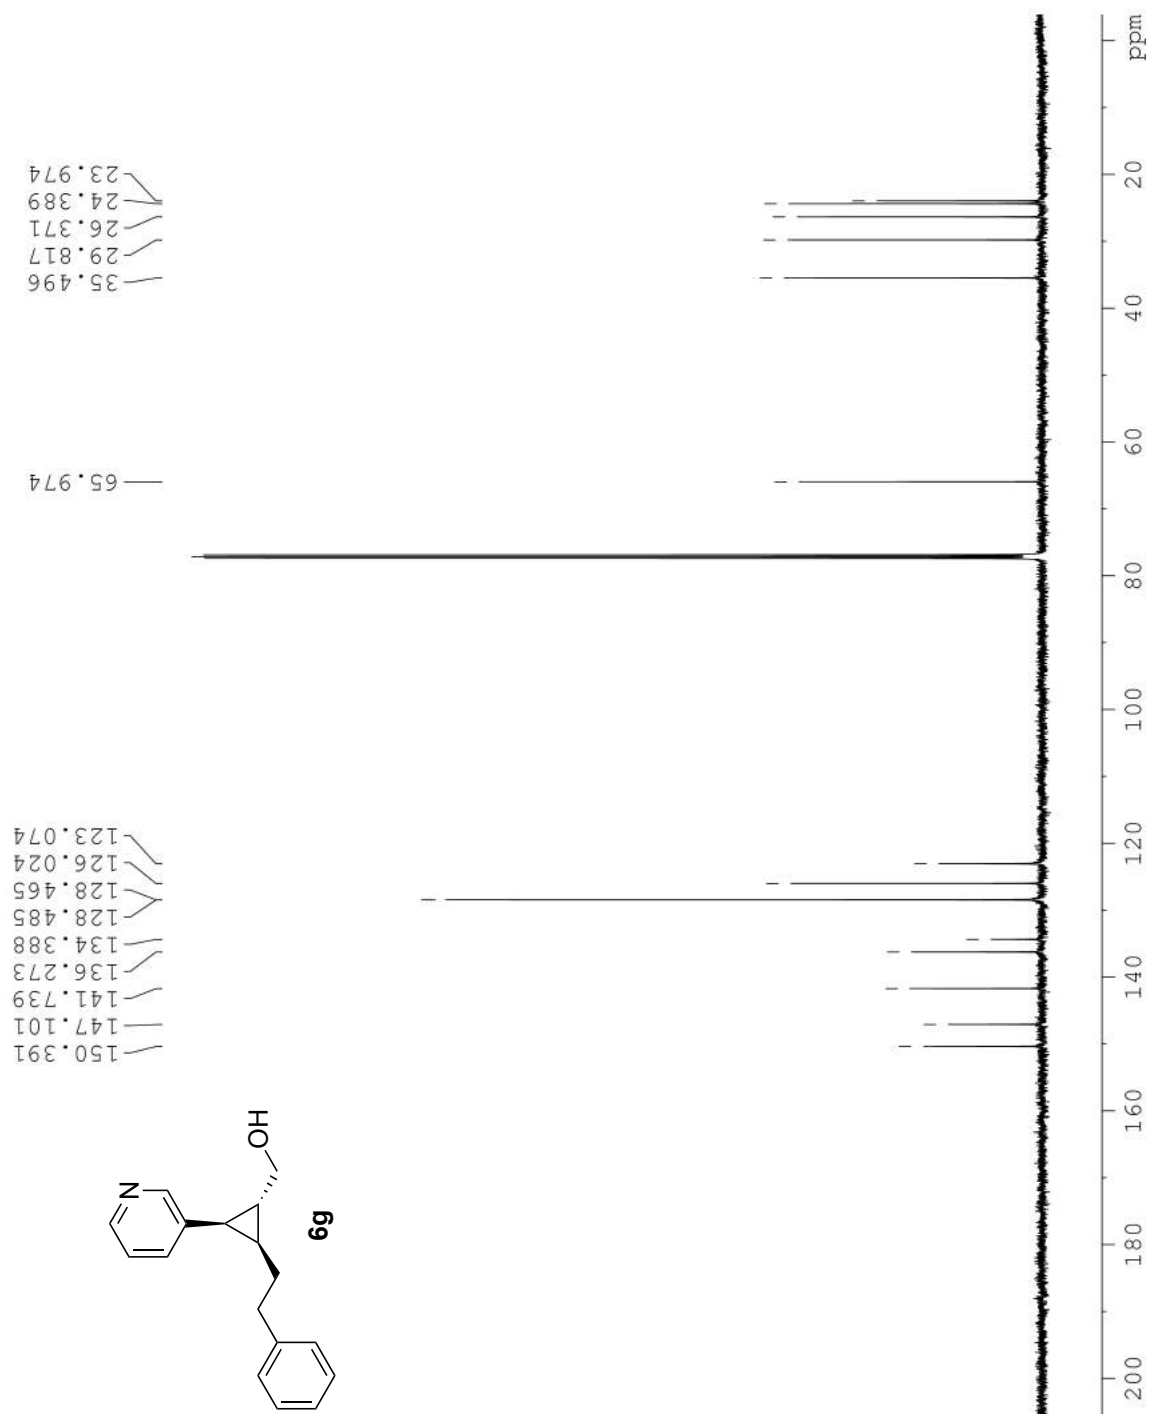

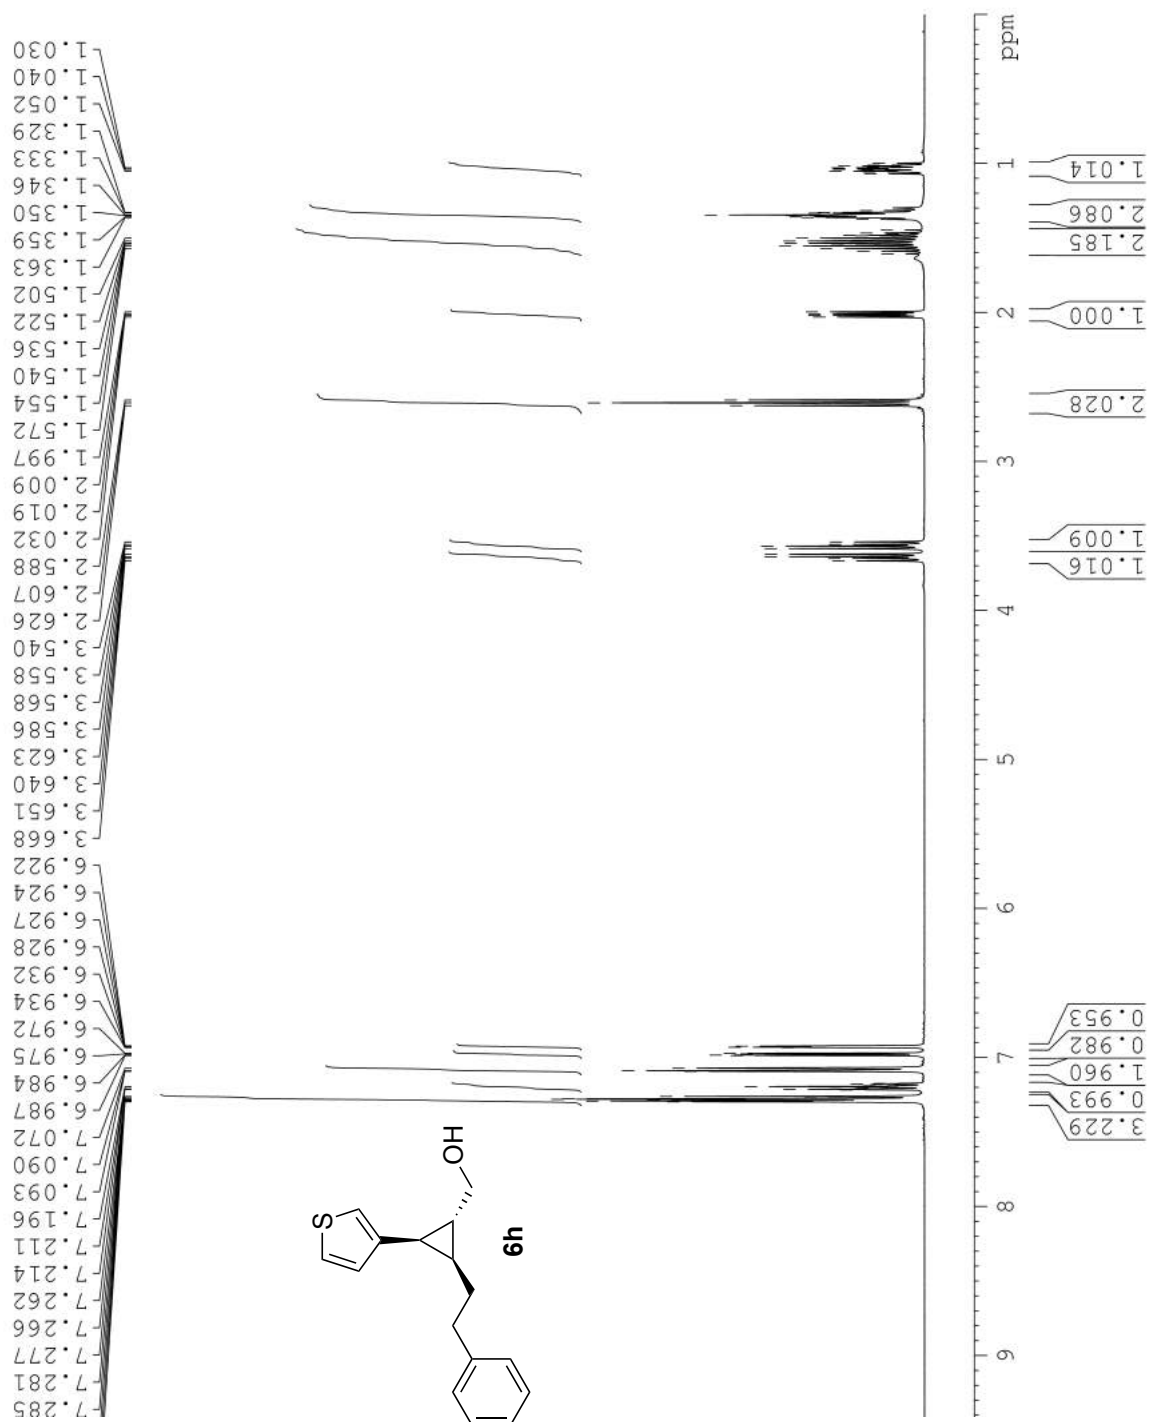

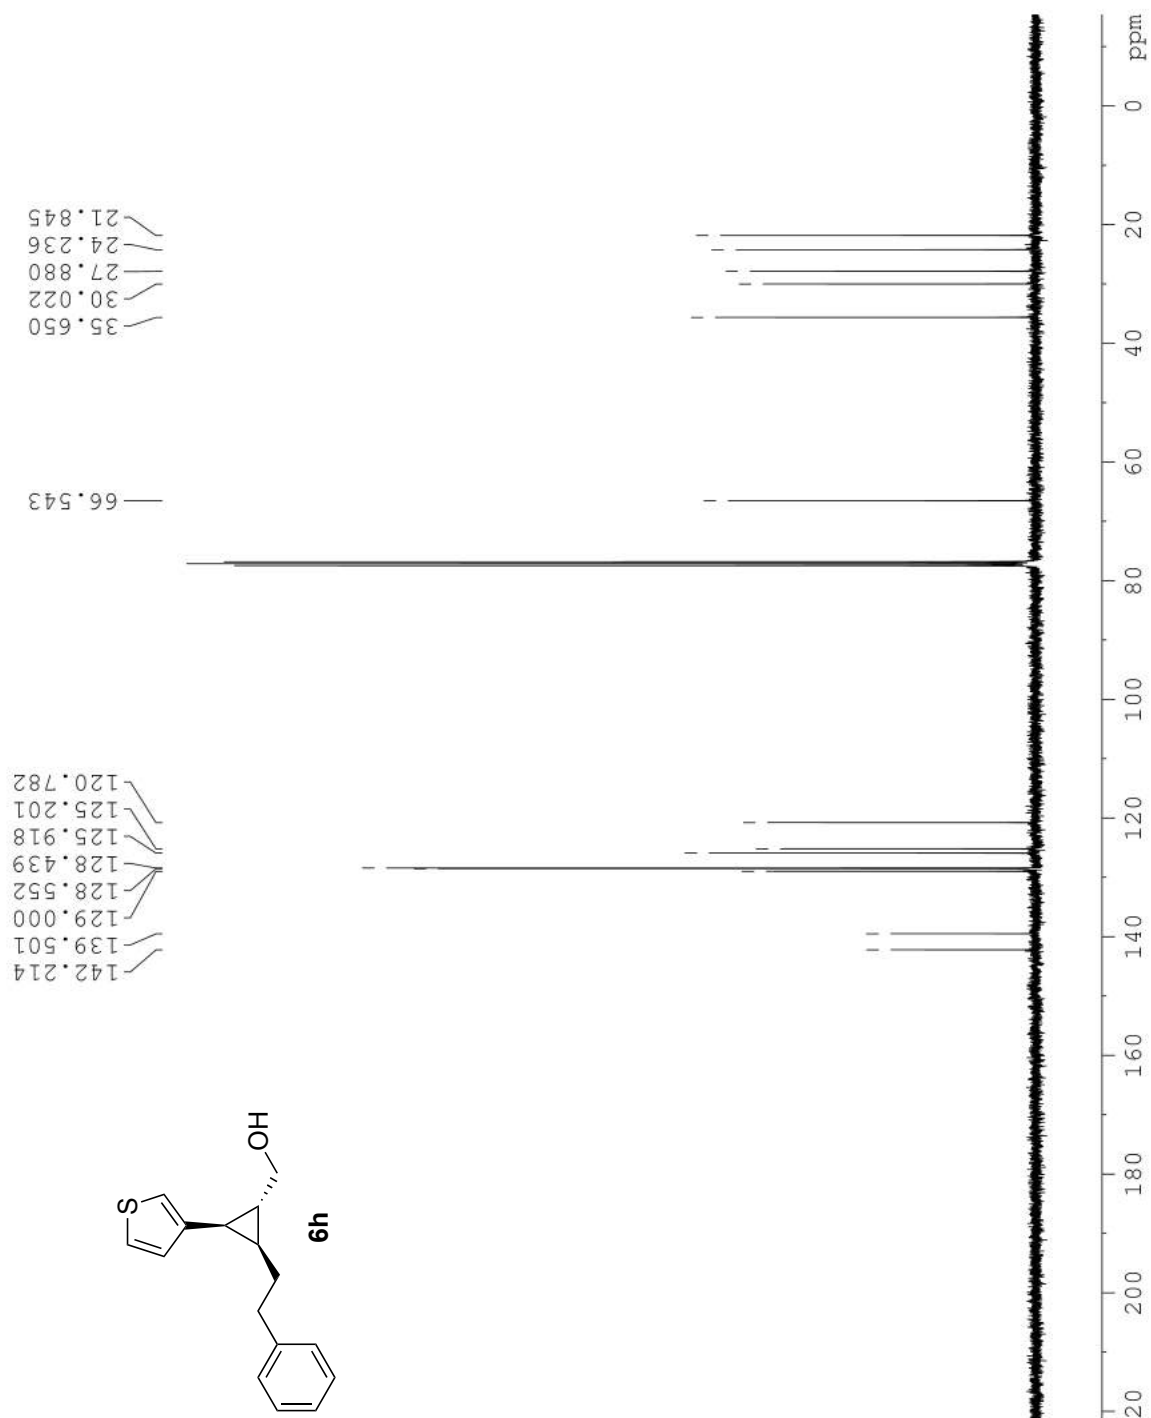

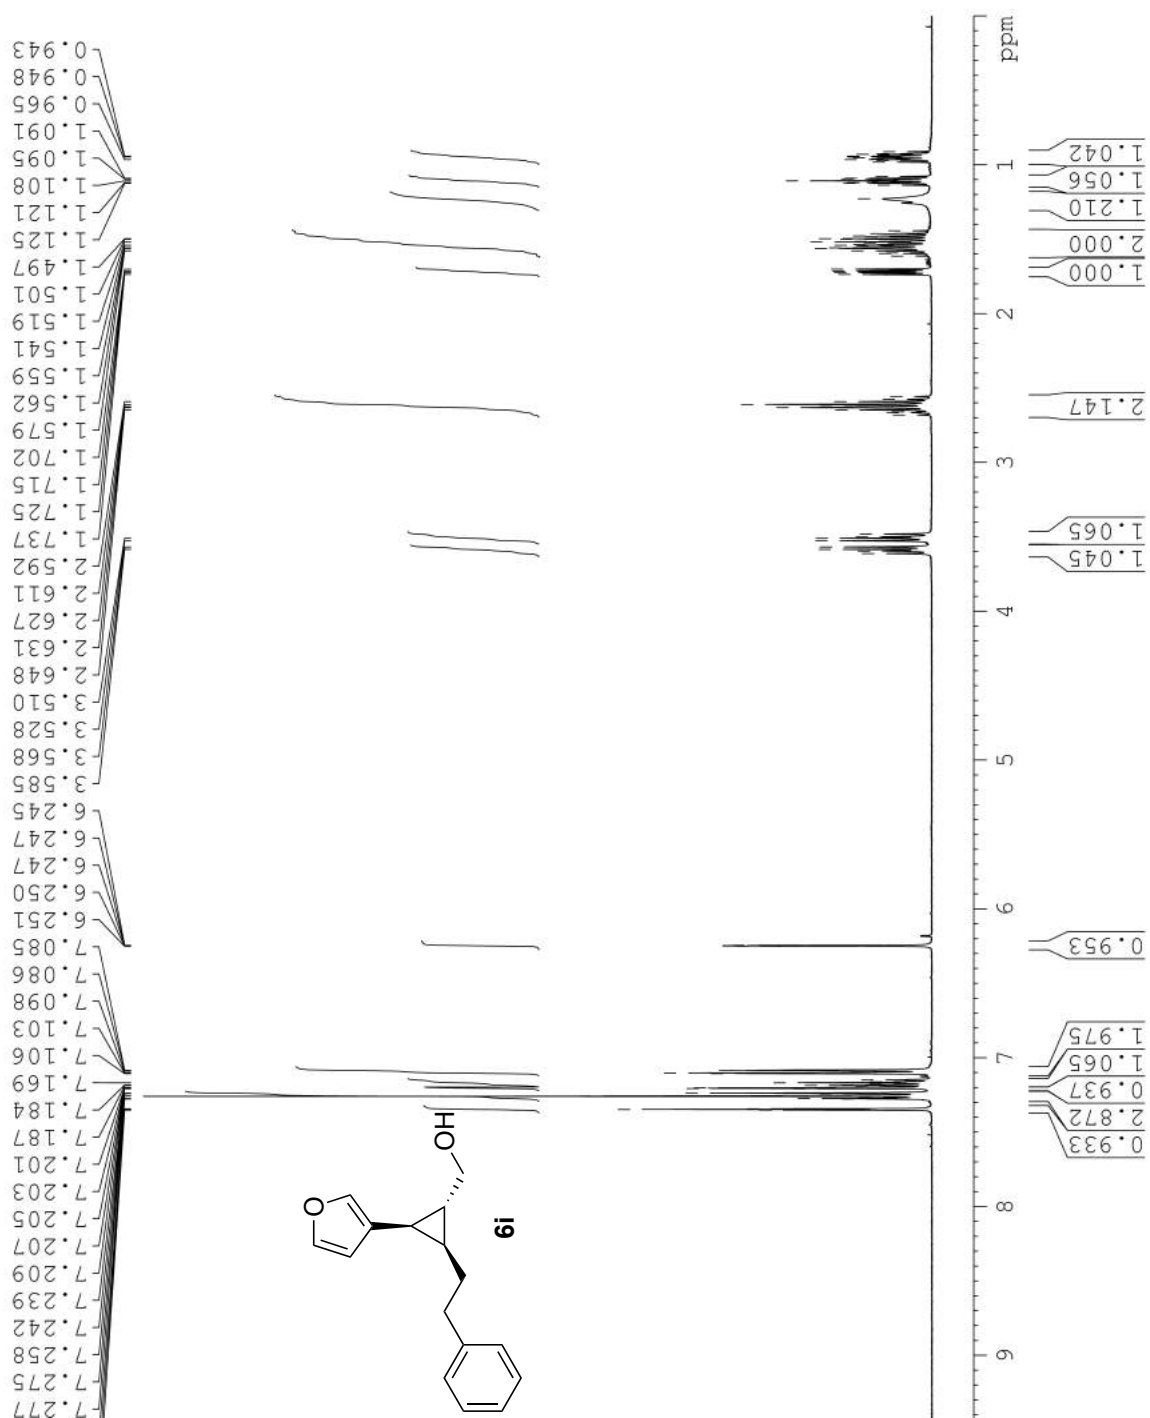

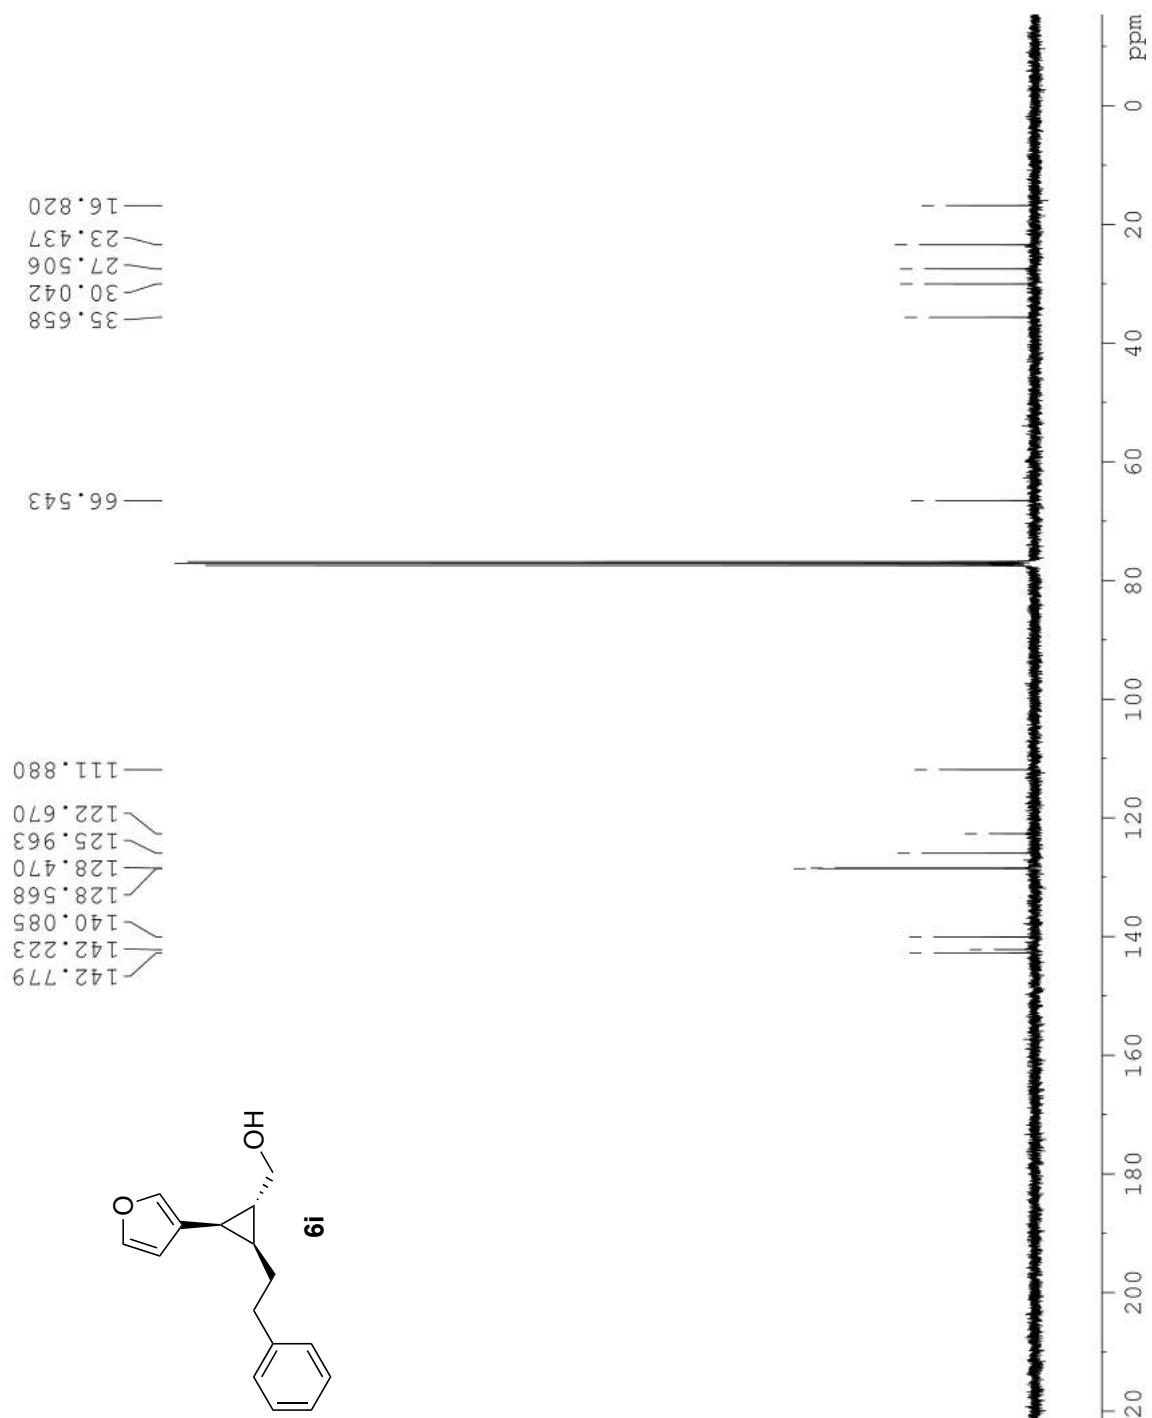

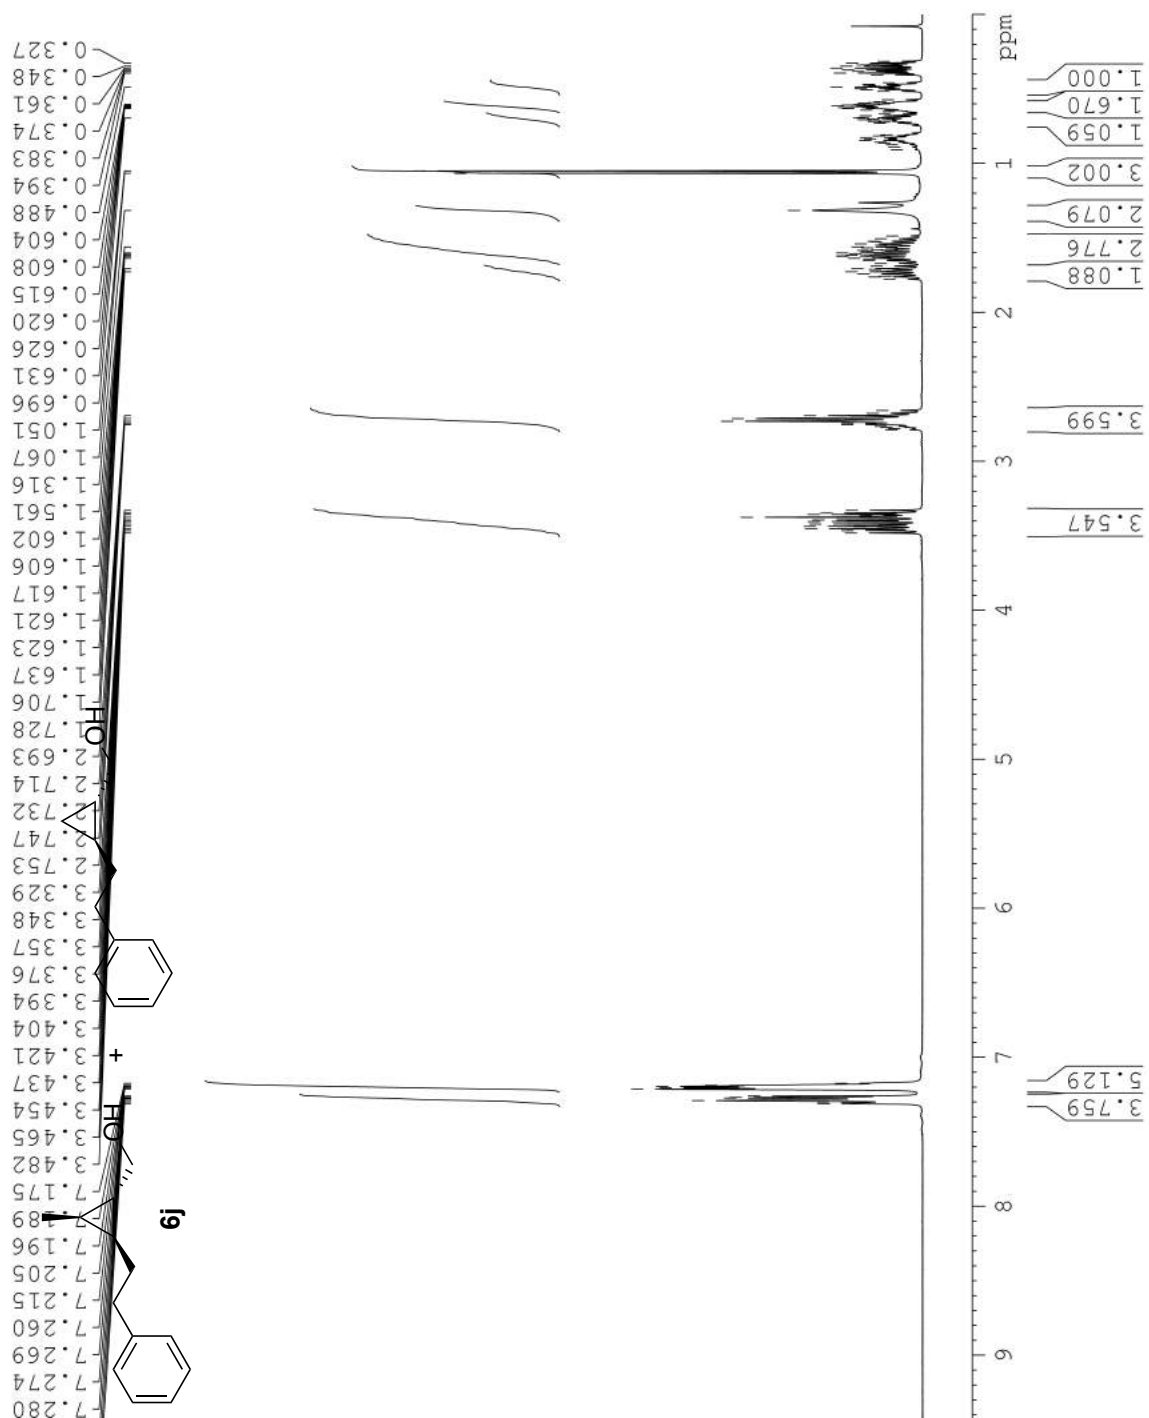



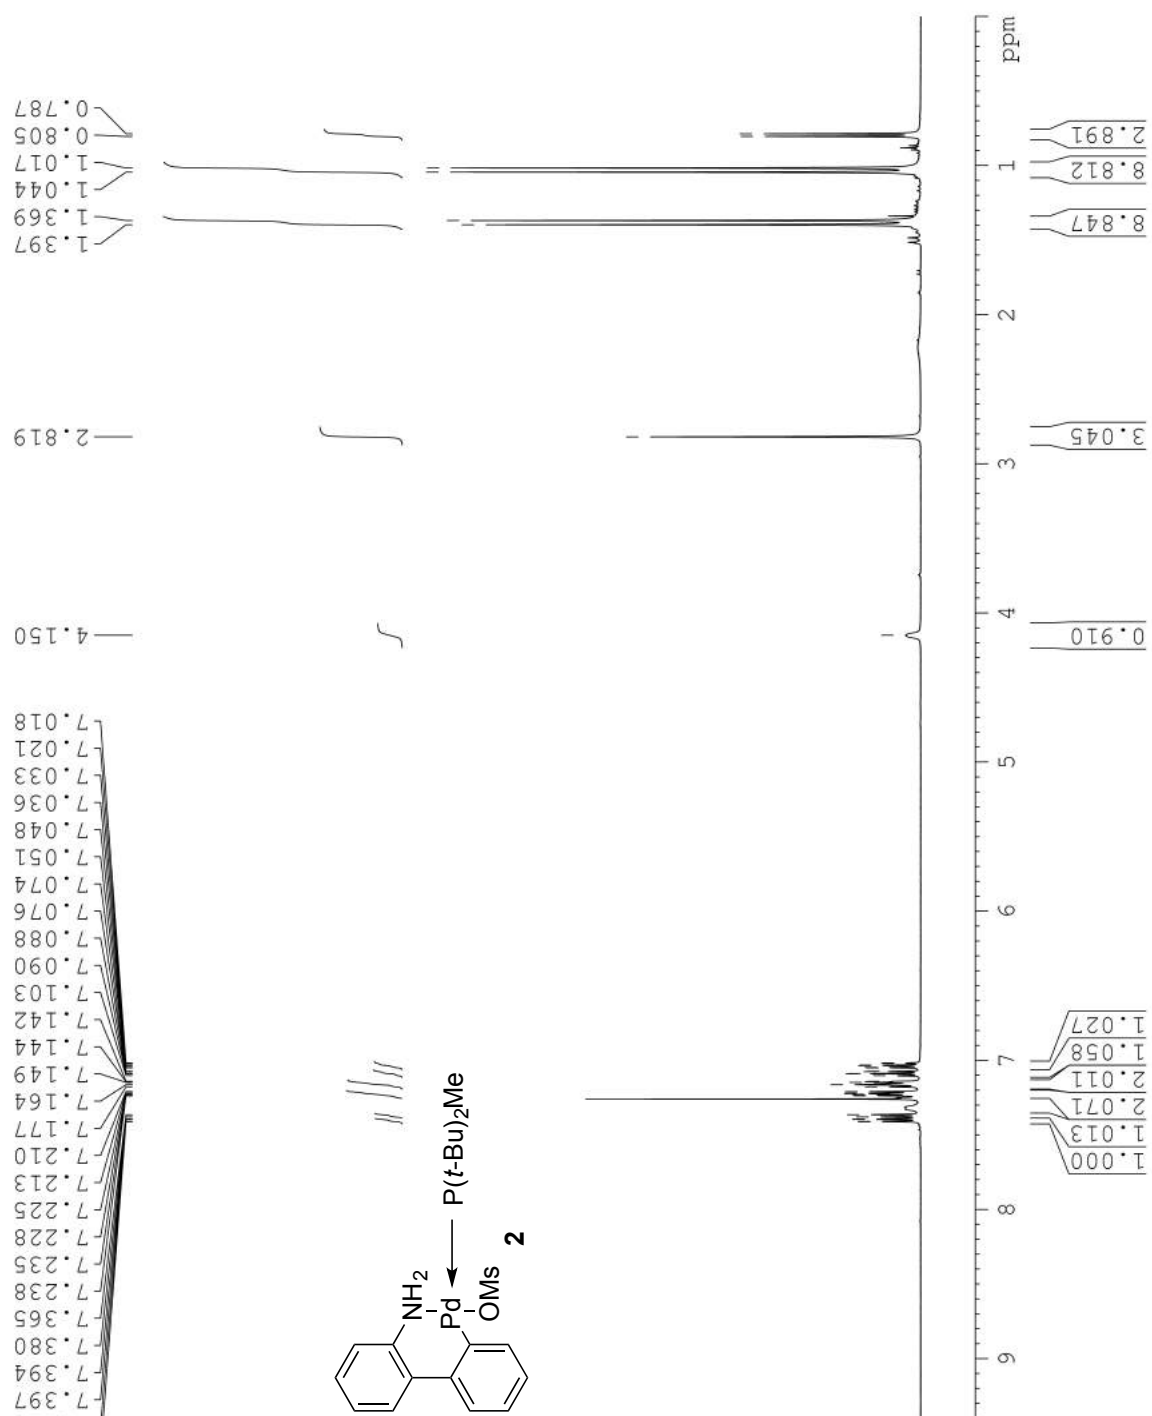

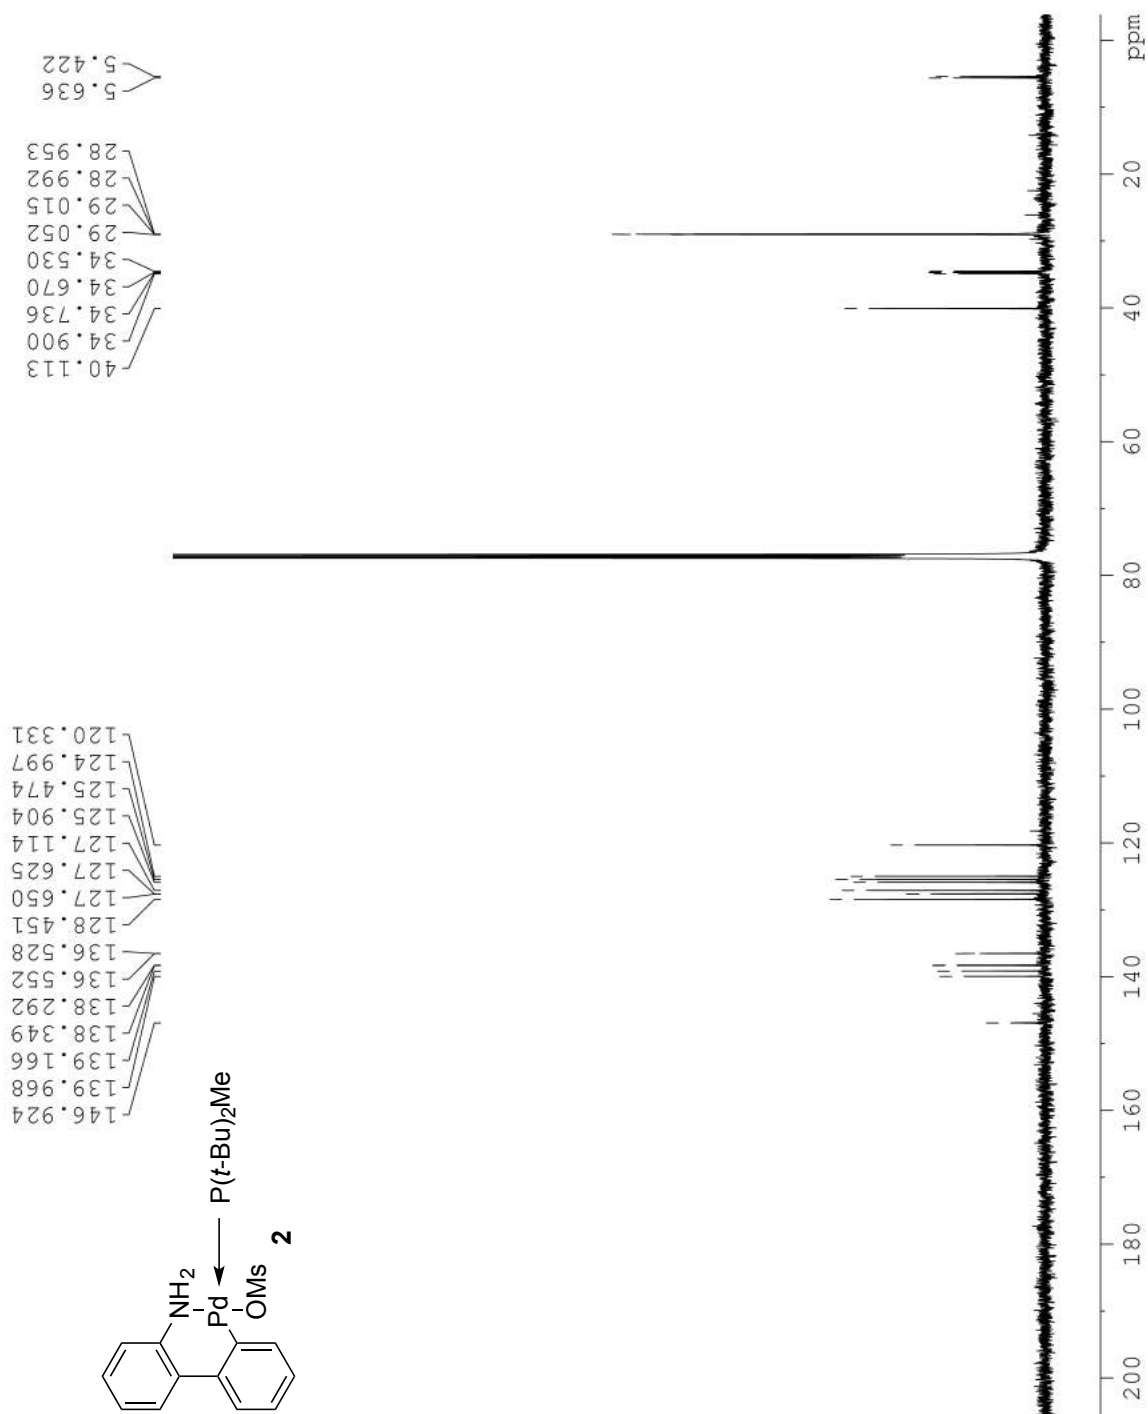

Supplement: c7cc04348a1.pdf [file c7cc04348a1.pdf]
